# Supplementary material for: Cultivating climate-smart crop systems: a systematic map of agronomic interventions in a Mediterranean-type climate
Source: Frontiers journal article supplement (doi:10.3389/fagro.2025.1632146), 2025-09-12
Supplement: Table_1.xlsx [file Table_1.xlsx]

## Sheet: Key
Code	Definition
study.source	Describes if the article comes from the systematic search or elsewhere
article.ID	Number identifier
citation	First author and year published
full.citation	Full citation of the article
title	Title of the article
year.of.publication	Year of article publication
journal	Journal of publication
publication.URL	Link to the article online
correspondance.contact	Corresponding contact as stated in the article
location	Location of the field study
location.country	Country where the location of the field study took place
latitude	GPS coordinate of the field study
longitude	GPS coordinate of the field study
primary.crop.of.focus	Includes the main cash crop of the cropping system studied
category.of.management.focus	Agronomic internvention(s) studied
study.objective	The study objective as stated by the article
study.type	Field study, pot study or metanalysis
trial.time.period	The time period the field study took place
trial.duration	The time duration the field study took place
treatments	The treatments included in the field study
framing.on.climate.change.mitigation/adaptation	Identifies if an article includes reference to climate change in the abstract, introduction or discussion
framing.climate.change.mit	Identifies if the article is specifically framed to be relevant to climate mitigation
framing.climate.change.adapt	Identifies if the article is specifically frmaed to be relevant to climate adaptation
mitigation.aspect.studied	Identifies if the study considered a GHG and/or carbon sequestration
mitigation.finding	Describes a key finding of the study relevant to climate mitigation
adaptation.finding	Describes a key finding of the study relevant to climate adaptation
economic.finding	Describes a key finding of the study relevant to economics
yield.finding	Describes a key finding of the study relevant to yield
additional.notes	Additional notes
Interventions	Identifies the agronomic intervention that is considered in the study

## Sheet: Database
study.source	article.ID	citation	full.citation	title	year.of.publication	journal	publication.URL	correspondance.contact	location	location.country	latitude	longitude	primary.crop.of.focus	category.of.management.focus	study.objective	study.type	trial.time.period	trial.duration	treatments	framing.on.climate.change.mitigation/adaptation	framing.climate.change.mit	framing.climate.change.adapt	mitigation.aspect.studied	mitigation.finding	adaptation.finding	economic.finding	yield.finding	additional.notes	Interventions
																													agroforestry	biochar.application	biostimulant	chemical.fertiliser.management	cover.crops	crop.rotation	crop.variety.selection	cultivar.selection/selective.breeding	harvesting.frequency	harvesting.time	hedgerow.application	hydraulic.arrangment	inorganic.amendment	intercropping	irrigation.management	livestock.integration	nitrogen.inhibitor	organic.fertiliser.management	planting.density	planting.technology	soil.cover: residue management, mulch
search	1	Abalos 2017	Abalos, D., Sanz-Cobena, A., Andreu, G., & Vallejo, A. (2017). Rainfall amount and distribution regulate DMPP effects on nitrous oxide emissions under semiarid Mediterranean conditions. 238, 45.	Rainfall amount and distribution regulate DMPP effects on nitrous oxide emissions under semiarid Mediterranean conditions	2017	Agriculture, Ecosystems & Environment	http://dx.doi.org/10.1016/j.agee.2016.02.003	diego.abalos@upm.es	Madrid	Spain	40.5333	-3.2833	Barley	chemical fertilizer management nitrogen inhibitor	to explore the potential of fertilizer application timing and a nitrification inhibitor (3,4dimethyl pyrazole phosphate; DMPP) to achieve low N2O, for a rainfed barley (Hordeum vulgare L. cv Pedrezuela) crop	Field trial	2011 to 2014	3 years	split fertilizer application at planting and at tillering with (1) or without DMPP (2); the same split fertilizations but applying DMPP only at tillering (3); and single fertilizer application al tillering with (4) or without DMPP (5)	Y	Y	N	N2O	DMPP application had lower N2O in year 1 (dry conditions) (72% decrease) In year 2 (wet conditions) DMPP was not as effective A single dose of fertiliser at tillering reduced N2O compared to fertilising twice (planting and tillering) and DMPP application DMPP and single fertiliser application at tillering reduced N2O in the third year (erratic rainfall distribution)	N	N	No change in yield with application of DMPP A single dose of fertilser at tillering may result in yield reductions in years of good rain compared to fertilisation at planting and tillering.					Y													Y
search	2	Acuna Rodriguez 2022	Acuña-Rodríguez, I. S., Ballesteros, G., Atala, C., Gundel, P. E., & Molina-Montenegro, M. A. (2022). Hardening Blueberry Plants to Face Drought and Cold Events by the Application of Fungal Endophytes. Agronomy-Basel, 12(5), 14, Article 1000. https://doi.org/10.3390/agronomy12051000	Hardening Blueberry Plants to Face Drought and Cold Events by the Application of Fungal Endophytes	2022	Agronomy	https:// doi.org/10.3390/agronomy12051000	marco.molina@utalca.cl	Talca	Chile	-35.4264	-71.6554	Blueberry	Resilience to Cold and Water stress symbiotic amendment	to evaluate the effects of inoculating two fungal endophytes isolated from Antarctic plants on the tolerance responses of V. corymbosum to events of cold-shock stress under different scenarios of water availability.	Pot trial	2017	1 season	With Antarctic root fungal endophytes and without	Y	N	Y	N/A	N/A	Inoculated plants ha improved survivability and fruit quality in cold and waater stressed environment	N/A	See adaptation finding
Search	3	Aguilera 2013a	Aguilera, E., Lassaletta, L., Gattinger, A., & Gimeno, B. S. (2013). Managing soil carbon for climate change mitigation and adaptation in Mediterranean cropping systems: A meta-analysis. Agriculture Ecosystems & Environment, 168, 25-36. https://doi.org/10.1016/j.agee.2013.02.003	Managing soil carbon for climate change mitigation and adaptation in Mediterranean cropping systems: A meta-analysis	2013	Agriculture, Ecosystems and Environment	http://dx.doi.org/10.1016/j.agee.2013.02.003	emagufer@upo.es	N/A	Global (Mediterranean)	40.4	16.8	croplands, including arable crops, orchards and horticulture, but excluding permanent grassland and forests	"Recommended management practices"	a meta-anlaysis comparing a wide range of recommended management practices (solid organic amendments, land treatment, cover crops, slurry applications, conservation tillage, combined practices and organic management) with conventional management.	Meta-analysis	N/A	N/A	Conventional farming compared to: organic management organic amendments land treatment (includes municiple solid waste and sewage sludge) cover crops slurry no tillage reduced tillage combined management practices unfertilised	Y	Y	N	SOC	Very high SOC increases are achieved by the application of external organic inputs to the soil (land treatment, organic amendments), suggesting a high potential for C storage in the soil. SOC is also increased by internal organic inputs and the reduction in soil disturbance (cover crops, reduced tillage, no tillage). The combination of organic inputs and reduced disturbance (combined management p…	N/A	N/A	N/A						Y													Y
search	4	Aguilera 2013b	Aguilera, E., Lassaletta, L., Sanz-Cobena, A., Garnier, J., & Vallejo, A. (2013).The potential of organic fertilizers and water management to reduce N2O emissions in Mediterranean climate cropping systems. A review. 164, 52. https://www.scopus.com/inward/record.uri?eid=2-s2.0-84869866611&doi=10.1016%2fj.agee.2012.09.006&partnerID=40&md5=ddfc00c1fd10ad831313906c3f8821d8	The potential of organic fertilizers and water management to reduce N2O emissions in Mediterranean climate cropping systems. A review	2013	Agriculture, Ecosystems and Environment	http://dx.doi.org/10.1016/j.agee.2012.09.006	emagufer@upo.es	Various	Global areas with Mediterranean-like climate	40.4	16.8	cereals, horticulture, woody crops	water management organic and chemical fertiliser	to review the current scientific knowledge, including an analysis of the effect of fertilizer type and water management on direct N2O emissions	Meta-analysis	2005 to 2011	(studies with data collected over >1 year	Organic vs synthetic fertilisers and water management, including rainfed, high-water systems, and low water systems	Y	Y	N	N2O	The most promising practices for reducing N2O through organic fertilization include: (i) minimizing water applications; (ii) minimizing bare soil; (iii) improving waste management; and (iv) tightening N cycling through N immobilization. The mitigation potential may be limited by: (i) residual effect; (ii) the longterm effects of fertilizers on SOM; (iii) lower yield-scaled performance; and (iv) t…	N/A	N/A	N/A					Y											Y			Y
search	5	Aguirre 2021	Aguirre, J.L.; Martín, M.T.; González, S.; Peinado, M. Effects and Economic Sustainability of Biochar Application on Corn Production in a Mediterranean Climate. Molecules 2021, 26, 3313.	Effects and Economic Sustainability of Biochar Application on Corn Production in a Mediterranean Climate	2021	Molecules	https://doi.org/10.3390/molecules26113313	juanl.aguirre@uah.es	Madrid	Spain	51.4787 40.4813	-0.29576 -3.3586	Maize	Biochar	to assess the effects of two types of biochar on corn production	Field trial	2020 to 2021	1 year	two types of biochar applied to maize crops with irrigation, no fertilizer B1 was fully pyrolyzed with 55.90% organic carbon, and B2 was medium pyrolyzed with 23.50% organic carbon.	N	N	Y	N/A	N/A	Biochar enhanced nutrient retention, including magnesium	It is estimated that it would take approximately 4 years to amortize the investment, with an estimated price of €190 per ton of biochar and also considering a 50% reduction of the fertilization costs and a 25% reduction of the irrigation costs with the maintenance of corn production over the years. If the CO2 emission is reduced by 2.06 tons using one ton of biochar and sold to the emissions mark…	The results of this study demonstrated that the application of biochar B1 increased corn production by 63.4–84% based on the dry grain weight in the first year. However, biochar B2, which was partially pyrolyzed, did not significantly affect corn production.			Y
search	6	Almagro 2023	Almagro, M., Díaz-Pereira, E., Boix-Fayos, C., Zornoza, R., Sánchez-Navarro, V., Re, P., Fernández, C., & Martínez-Mena, M. (2023). The combination of crop diversification and no tillage enhances key soil quality parameters related to soil functioning without compromising crop yields in a low-input rainfed almond orchard under semiarid Mediterranean conditions. Agriculture Ecosystems & Environmen…	The combination of crop diversification and no tillage enhances key soil quality parameters related to soil functioning without compromising crop yields in a low-input rainfed almond orchard under semiarid Mediterranean conditions	2023	Agriculture, Ecosystems and Environment	https://doi.org/10.1016/j.agee.2022.108320	mbonmati@cebas.csic.es (M. Almagro), mmena@cebas.csic.es (M. Martínez-Mena)	Los Ramos	Spain	37.9586111	-0.9380555	Almond	Intercropping Tillage management	to assess the impacts of inter-cropping under rainfed semiarid conditions on: 1) the main crop yield and the land equivalent ratio as indicators of the agroecosystem productivity and sustainability; 2) a suite of soil physical properties related to ecosystem services such as water regulation and soil retention (bulk density, aggregate stability and available water for plants); and 3) a set of soi…	Field trial	2019 to 2021	three years	almond monocrop with chisel ploughing, almond inter-cropped with caper, and almond intercropped with winter thyme;	Y	Y	Y	SOC	the topsoil organic carbon content only enhanced in the almond inter-cropped with winter thyme	soil aggregate stability and water availability for plants were significantly improved in the topsoil of both crop diversifications while the soil bulk density remained very similar in all crop management treatments	N/A	Crop diversification did not significantly affect the main crop yields over the 3-year study period															Y
search	7	Alvaro-Fuentes 2008	Àlvaro-Fuentes, J., López, M. V., Arrúe, J. L., & Cantero-Martínez, C. (2008). - Management effects on soil carbon dioxide fluxes under semiarid Mediterranean conditions. - 72(- 1), - 200. - https://www.scopus.com/inward/record.uri?eid=2-s2.0-38349103075&doi=10.2136%2fsssaj2006.0310&partnerID=40&md5=eeedb12d9b9e49aa8aadc04f550a1fc7	Management effects on soil carbon dioxide fluxes under semiarid Mediterranean conditions	2008	Soil Science Society of America Journal	https://doi.org/10.2136/sssaj2006.0310	jalvaro.fuentes@gmail.com	Selvanera, Agramunt, Penaflor	Spain	41.8333 41.8000 41.7333	1.2833 1.1167 -0.7667	Barley and wheat	Tillage management	to determine the effects of tillage and cropping systems on C inputs and soil CO2 fl uxes under semiarid Mediterranean conditions.	Field trial	2002 to 2005	3 seasons	Agramunt: barley-wheat rotatioin under conventional till, subsoil tillage, reduced tillage, no till Selvanera: wheat barley-wheat-rapeseed rotation under conventional till, subsoil till, reduced till and no till Penaflor: continuous barley croppiing, barley-fallow rotation under conventional till, reduced till and no tilll	Y	Y	N	CO2	Although differences among tillage treatments were weak, CO2 fl uxes under NT were always lower. Intensifi cation of cropping systems led to an increase in C input. A move from CT to NT together with cropping intensifi cation is suitable to increase C inputs and to reduce soil CO2 fl uxes in semiarid Mediterranean agroecosystems	N/A	N/A	N/A
search	8	Andres 2022	Andrés, P., Doblas-Miranda, E., Silva-Sánchez, A., Mattana, S., & Font, F. (2022). Physical, Chemical, and Biological Indicators of Soil Quality in Mediterranean Vineyards under Contrasting Farming Schemes. Agronomy-Basel, 12(11), 19, Article 2643. https://doi.org/10.3390/agronomy12112643	Physical, Chemical, and Biological Indicators of Soil Quality in Mediterranean Vineyards under Contrasting Farming Schemes	2022	Agronomy	https://doi.org/10.3390/agronomy12112643	p.andres@creaf.uab.cat	Girona Province	Spain	42.31850 42.31917 42.31708	3.07839 3.07828 3.07681	Grape	Low and high input management	(a) to provide indicators of soil carbon stocks and soil biodiversity that are appropriate to evaluate farming schemes in Mediterranean vineyards, and (b) to compare vineyards managed under intensive and sustainable schemes based on these indicators	Field trial	2019	1 sampling period	management strategies: intensive management (INT), regenerative management (REG), and minimum impact management (MIN)	Y	Y	Y	SOC	Regenerative and Minimpact vineyard had significantly more SOC	vineyards managed under regenerative and minimum impact strategies for 5 and 12 years, respectively, after a long history of intensive farming, contain significantly more organic carbon and support significantly more soil invertebrates than a comparable vineyard that is managed intensively. Regenerative viticulture particularly benefits functional groups of the soil food web that are key players …	N/A	N/A					Y														Y			Y
search	9	Angeletti 2021	Angeletti C, Monaci E, Giannetta B, Polverigiani S, Vischetti C. 2021. Soil organic matter content and chemical composition under two rotation management systems in a Mediterranean climate. Pedosphere. 31(6): 903–911	Soil organic matter content and chemical composition under two rotation management systems in a Mediterranean climate	2021	Pedosphere	https://doi.org/10.1016/S1002-0160(21)60032-2	c.vischetti@staff.univpm.it	Ancona	Italy	43.5678	13.4264	Alfalfa and Cereal	Organic management tillage management	to study the impact of cropping sequences impact soil organic matter	Field trial	2011 to 2013	13 growing seasons	Two different crop rotations over 13 years: low intensity tillage alfalfa system, that grew afalfa, wheat, broad bean and high intensity cereal system of barley, sunflower, broad bean and bare fallow. During the experiment wheat was grown, followed by chickpea.	Y	Y	N	SOC	The repeated cultivation of alfalfa in the “alfalfa-based” system resulted in higher amounts of organic C accumulated in the soil, compared to the conventional cereal-sunflowerlegume “cereal-based” crop rotation	N/A	N/A	N/A																			Y
search	10	Annicchiarico 2013	Annicchiarico, P., Pecetti, L., Abdelguerfi, A., Bouzerzour, H., Kallida, R., Porqueddu, C., Simoes, N. M., & Volaire, F. (2013). Optimal forage grass germplasm for drought-prone Mediterranean environments. Field Crops Research, 148, 9-14. https://doi.org/10.1016/j.fcr.2013.03.024	Optimal forage grass germplasm for drought-prone Mediterranean environments	2013	Field Crops Research	http://dx.doi.org/10.1016/j.fcr.2013.03.024	paolo.annicchiarico@entecra.it	Elvas Montpellier Sassari Alger Setif Merchouch	Portugal France Italy Algeria Morocco	38.8666667 43.6 40.7666667 36.75 36.1833333 33.55	-7.15 3.8833333 8.4666667 3.05 5.4 -6.6833333	(perennial forage) cocksfoot and tall fescue	Crop selection	to support breeders in choosing target species and plant types, and agronomists in setting site-specific forage recommendations for the western Mediterranean basin	Field trial	2004 to 2006	3 seasons	Cultivars grown in each site: Kasbah and Jana of cocksfoot, and Flecha and Centurion of tall fescue	Y	N	Y	N/A	N/A	tall fescue displayed higher dry matter yield and a slight trend towards greater persistence than cocksfoot	N/A	See adaptation								Y
search	11	Antichi 2019	Antichi, D., Sbrana, M., Martelloni, L., Abou Chehade, L., Fontanelli, M., Raffaelli, M., Mazzoncini, M., Peruzzi, A., & Frasconi, C. (2019). Agronomic Performances of Organic Field Vegetables Managed with Conservation Agriculture Techniques: A Study from Central Italy. Agronomy-Basel, 9(12), 27, Article 810. https://doi.org/10.3390/agronomy9120810	Agronomic Performances of Organic Field Vegetables Managed with Conservation Agriculture Techniques: A Study from Central Italy	2019	Agronomy	https://doi.org/10.3390/agronomy9120810	daniele.antichi@unipi.it	Pisa	Italy	43.6667	10.3167	Savoy cabbage (Brassica oleracea var. sabauda L. cv. Famosa F1, Bejo), spring lettuce (Lactuca sativa L. cv. Justine, Clause), fennel (Foeniculum vulgare Mill. Cv. Montebianco F1, Olter), and summer lettuce (L. sativa L. cv. Ballerina RZ, Rijk Zwaan)	Tillage Management Organic fertiliser	to assess the agronomic performance of organic vegetable production with conservation agriculture management included	Field trial	2014 to 2017	3 years	three cropping systems compared were a control, represented by an integrated farming system (INT) based on conventional tillage practices (i.e., spading, rotary cultivation, and hoeing), mechanical and chemical weed control, chemical pesticide, and mineral fertilizer (ammonium nitrate, superphosphate, and potassium sulphate) use; a standard organic cropping system (ORG), built upon the same tilla…	N	N	Y	N/A	plots without N fertilisation generated lower N2O emissions during the initial alfalfa cropping phase. These lower emissions, combined with higher total dry matter values, resulted in the lowest scaled emissions in treatments without N fertilisation. Compared to maize and wheat, alfalfa has the lowest emissions per ton product.	The organic and conservation system did not achieve the yield or nutrient availabiity compared to organic farms and integrated farming systems.		organic conservative system tested in our experiment (ORG+) revealed to be ineffective in terms of crop yield and N uptake for the four vegetable crops.																			Y
search	12	Badagliacca 2018	Badagliacca, G., Benítez, E., Amato, G., Badalucco, L., Giambalvo, D., Laudicina, V. A., & Ruisi, P. (2018). - Long-term no-tillage application increases soil organic carbon, nitrous oxide emissions and faba bean (Vicia faba L.) yields under rain-fed Mediterranean conditions. - 639, - 359. - https://www.scopus.com/inward/record.uri?eid=2-s2.0-85047267942&doi=10.1016%2fj.scitotenv.2018.05.157&part…	Long-term no-tillage application increases soil organic carbon, nitrous oxide emissions and faba bean (Vicia faba L.) yields under rain-fed Mediterranean conditions	2018	Science of the Total Environment	https://doi.org/10.1016/j.scitotenv.2018.05.157	vitoarmando.laudicina@unipa.it	Pietranera	Italy	37.5	13.5167	Wheat	Tillage management and Crop rotations	to evaluate the impact of long-term NT and, CT, in affecting the grain and biomass yield of faba beans and the emissions of N2O and NH3 from a Vertisol under typical Mediterranean conditions	Field trial	2013 to 2015	2 seasons	Soil tillage: conventional, reduced and no till crop rotation: wheat-faba bean	Y	Y	N	N2O	increase of the N2O emissions from soil in NT (approximately +50% compared to CT, on average); significant differences have been observed even when N2O emissions have been scaled to yield (+29%)	N/A	N/A	higher faba bean grain yield in NT than that in CT in 2013–2014, which is consistent with the long-term average data (i.e., the 1992–2013 period), and no difference between the two tillage systems in 2014–2015							Y
search	13	Badagliacca 2022	Badagliacca, G., Lo Presti, E., Ferrarini, A., Fornasier, F., Laudicina, V. A., Monti, M., & Preiti, G. (2022). Early Effects of No-Till Use on Durum Wheat (<i>Triticum durum Desf.</i>): Productivity and Soil Functioning Vary between Two Contrasting Mediterranean Soils. Agronomy-Basel, 12(12), 23, Article 3136. https://doi.org/10.3390/agronomy12123136	Early Effects of No-Till Use on Durum Wheat (Triticum durum Desf.): Productivity and Soil Functioning Vary between Two Contrasting Mediterranean Soils	2022	Agronomy	https://doi.org/10.3390/ agronomy12123136	emilio.lopresti@unirc.it	S. Marco Argentano and Reggio Calabria	Italy	39.6333333 38.1666667	16.2166667 15.75	Durum Wheat	Tillage management	to evaluate the early effect of NT use, compared to the conventional mouldboard ploughing (CT), on two different soils, a clay-loam (GAL) and a sandy-clay-loam soil (SMA)	Field trial	2019 to 2020	1 season	Conventional tillage and No-tillage	Y	N	Y	N/A	N/A	NT showed lower wheat total biomass (−29%) and grain yields (−17%) than CT with a more pronounced decrease in GAL than in SMA. Yield differences were accompanied by modifications in nutrient, microbial community and soil enzyme activity dynamics which highlighted higher stress in GAL, than in SMA soil, attributable to lower crop residues decomposition and substrate availability	N/A	See adaptation
search	14	Bastida 2017	Bastida, F., Torres, I. F., Romero-Trigueros, C., Baldrian, P., Vetrovsky, T., Bayona, J. M., Alarcón, J. J., Hernández, T., García, C., & Nicolás, E. (2017). Combined effects of reduced irrigation and water quality on the soil microbial community of a citrus orchard under semi-arid conditions. Soil Biology & Biochemistry, 104, 226-237. https://doi.org/10.1016/j.soilbio.2016.10.024	Combined effects of reduced irrigation and water quality on the soil microbial community of a citrus orchard under semi-arid conditions	2017	Soil Biology and Chemistry	http://dx.doi.org/10.1016/j.soilbio.2016.10.024	fbastida@cebas.csic.es	Campot_x0003_ejar-Murcia	Spain	38.12167	-1.22083	Grapefruit	Irrigation organic fertiliser	to evaluate the longterm impacts of irrigation systems differing on the quantity and quality of water, and their interactions, on the biomass (phospholipid fatty acid analysis), diversity and composition (16S rRNA gene profiling), and enzyme activities of the soil microbial community of an orchard cultivated with grapefruit trees in South-East Spain	Field trial	2015	Unknown	4 treatments: conventional water used for irrigation 100% reclaimed water from a wastewater treatment plant 100% conentional water, reduced to 50% during second stage of fruit growth (55 to 65 days) reclaimed water, reduced to 50% during second stage of fruit growth (55 to 65 days)	N	N	Y	N/A	N/A	Amount of water is key. If water is limited, it is better to use reclaimed water than reduced water of better quality. the increased organic decomposable compounds of reclaimed water did not counter balance the negative impact of water limitations	N/A	N/A																Y			Y
search	15	Benlhabib 2014	Benlhabib, O., Yazar, A., Qadir, M., Lourenço, E., & Jacobsen, S. E. (2014). How Can We Improve Mediterranean Cropping Systems? Journal of Agronomy and Crop Science, 200(5), 325-332. https://doi.org/10.1111/jac.12066	How Can We Improve Mediterranean Cropping Systems?	2014	Journal of Agronomy and Crop Science	https://doi.org/10.1111/jac.12066	o.benlhabib@gmail.com	Bouchane and Mnabha (Morocco) Irshaf and Qawekly (Syria) Cukurova (Turkey)	Morocco Syria Turkey	36.8	35.2833333	Durm wheat	Crop rotation	to analyse typical Mediterranean cropping systems in dry areas that considered various sustainable cropping techniques	Field trial	2008 to 2012	4 seasons	The farms had varied management. Each followed similar crop rotations including continutous wheat, wheat-legume, wheat-legume-wheat-quinoa	Y	N	Y	N/A	N/A	1 Rotations that include legumes and quinoa can improve soil fertility and productivity, optimize fertilizer use of organic manure, optimize use of equipment and reduce climate change and market risks. 2 The cultivation of climate proof varieties and crops shows potential for harsh environments, being water-use efficient and drought resistant. 3 Practising reduced tillage to limit evaporation and…	N/A	See adaptation							Y
search	16	Bosco 2019	Bosco, S., Volpi, I., Antichi, D., Ragaglini, G., & Frasconi, C. (2019). Greenhouse Gas Emissions from Soil Cultivated with Vegetables in Crop Rotation under Integrated, Organic and Organic Conservation Management in a Mediterranean Environment. Agronomy-Basel, 9(8), 25, Article 446. https://doi.org/10.3390/agronomy9080446	Greenhouse Gas Emissions from Soil Cultivated with Vegetables in Crop Rotation under Integrated, Organic and Organic Conservation Management in a Mediterranean Environment	2019	Agronomy	https://doi.org/10.1016/S1002-0160(21)60032-210.3390/agronomy9080446	s.bosco@santannapisa.it	Pisa	Italy	43.6667	10.3167	Crop rotation of Savoy cabbage (Brassica oleracea var. sabauda L. cv. Famosa), spring lettuce (Lactuca sativa L. cv. Justine), fennel (Foeniculum vulgare Mill. cv. Montebianco) and summer lettuce (L. sativa cv. Ballerina).	Tillage management organic practices	to assess the greenhouse gas emissions of a combination of organic and conservation approaches to produce vegetables.	Field trial	2014 to 2016	2 years	three different management systems: integrated farming with conventional tillage practices, chemical pesticide uses and mineral fertilization (INT); organic farming with conventional tillage practices, organic fertilizers, green manure and physical (mechanical with roller crimper and thermal with flaming) weed control (ORG); organic farming combined with conservation practices including no-tillag…	Y	Y	N	N2O, CH4, CO2	Both cumulative and daily N2O emissions were mainly lower in organic conservation system (ORG+) than in integrated farming system (INT) and organic system (ORG). All the cropping systems acted as a sink of CH4, with no significant differences among treatments. The ORG and ORG+ systems accounted for higher cumulative and daily CO2 emissions than INT, maybe due to the stimulating effect on soil res…	N/A	N/A	N/A																			Y
search	17	Calone 2021	Calone, R.; Bregaglio, S.; Sanoubar, R.; Noli, E.; Lambertini, C.; Barbanti, L. Physiological Adaptation to Water Salinity in Six Wild Halophytes Suitable for Mediterranean Agriculture. Plants 2021, 10, 309	Physiological Adaptation to Water Salinity in Six Wild Halophytes Suitable for Mediterranean Agriculture	2021	Plants	https://doi.org/ 10.3390/plants10020309	roberta.calone3@unibo.it	Bologna	Italy	44.51385933019608,	11.407461013277118	Artemisia absinthium L., Artemisia vulgaris L., Atriplex halimus L., Chenopodium album L., Salsola komarovii Iljin, and Sanguisorba minor halophytes with potential to higher salt tolerance and potential agriculture value (as vegetable, source of medicinal and nutraveutical	Alternative crops (salt tolerance)	to increase the knowledge on how these salt-tolerant born species cope with salinity at the ecophysiological level and which saline conditions they prefer, can tolerate or are vulnerable to	Pot trial	2017	1 season	Pot experiments, watered with differenet sainity levels.	N	N	Y	N/A	N/A	A. halimus and C. album are the best adapted species to salinity, followed by the group of S. komarovii and A. vulgaris, whereas S. minor and A. absinthium emerged as the least capable to adapt to increasing salinity levels	N/A	N/A	*exception made for pot trial because of study on resilience							Y
search	18	Cammerino 2025	Cammerino, A. R. B., Ingaramo, M., Rizzi, V., Gioiosa, M., & Monteleone, M. (2025). Glasswort as a Strategic Crop in Coastal Wetlands: Intercropping Results with Swiss Chard. Agronomy-Basel, 15(1), 24, Article 158. https://doi.org/10.3390/agronomy15010158	Glasswort as a Strategic Crop in Coastal Wetlands: Intercropping Results with Swiss Chard	2025	Agronomy	https://doi.org/10.3390/ agronomy15010158	annarita.cammerino@unifg.it	Siponto	Italy	41.70833	15.81972	glass wort	Intercropping Irrigation type organic fertiliser	to evaluate the productivity of Salicornia europaea L. subsp. ramosisima as a halophyte plant under field conditions and high soil salinity. Salicornia europaea L. subsp. ramosisima [53] (glasswort) was grown together with Beta vulgaris L. subsp. cicla (Swiss chard)	Field trial	2023 to 2024	2 seasons	Monocropping of swiss chard and glass wort and intercropping of swiss chard with glass wort irrigation treatments: drip irrigation and alternative irrigation ("Konkom" fertilisation treatment: unfertilised, fluid organic plant extract from vermicompost, fluid organic fertiliser from sugar beet molassis processing	Y	N	Y	N/A	N/A	Glasswort is economically promising as a valuable crop with low cultivation costs and interesting applications in the food industry. By intercropping glasswort with other crops,	N/A	Glasswort showed high productivity in high water salinity compared to swiss chard. Swiss chard perfomed better when intercropped with drip irrigation in high salt conditions. Glasswort was more productive in a monocrop.															Y	Y			Y
search	19	Campesi 2023	Campesi, G., Deligios, P. A., Ledda, L., Madau, F., Piluzza, G., Re, G. A., Sanna, F., & Sulas, L. (2023). - Starter irrigation in sulla as a promising practice to climate change adaptation of Mediterranean rainfed forage systems. - 37(- 2), - 169. - https://www.scopus.com/inward/record.uri?eid=2-s2.0-85160852892&doi=10.31545%2fintagr%2f162340&partnerID=40&md5=4e627df42793556dd0e4d46179068b00	Starter irrigation in sulla as a promising practice to climate change adaptation of Mediterranean rainfed forage systems	2023	International Agrophysics	https://doi.org/10.31545/intagr/162340	p.a.deligios@staff.univpm.it leonardo.sulas@cnr.it	Sardinia	Italy	40.6508	8.61806	Sulla coronaria (L.) Medik syn. Hedysarum coronarium L.	irrigation management (Drought tolerance)	to investigate the feasibility of starter irrigation (the land was moistened to restart vegetative regeneration in a timely manner) and to evaluate the productive, environmental and economic implications of cultivating sulla	Field trial	2020 to 2022	2 seasons	The treatments were “starter irrigation” (STI; repeated irrigation events to stimulate and to assure the vegetative regeneration of sulla plants in the autumn, scheduled to take place irrespective of seasonal drought events) as compared to “rainfed” (RAI; subjected to natural precipitation events)	Y	Y	Y	N2O	Less fertiliser is needed saving N2O emissions	Starter irrigation is a viable proposition which should be implemented in typical rainfed sulla cropping as a promising practice for contributing to more regular forage availability and as an effective adaptation strategy against the adverse effects of climate change	Profitability would increase (881 euro /ha), suggesting the economic case is there.	N/A	The study discusses "CO2" but they only account for emissions linked to fertiliser use.															Y
search	20	Campi 2020	Campi, P., Gaeta, L., Mastrorilli, M., & Losciale, P. (2020). Innovative Soil Management and Micro-Climate Modulation for Saving Water in Peach Orchards. Frontiers in Plant Science, 11, 13, Article 1052. https://doi.org/10.3389/fpls.2020.01052	Innovative Soil Management and Micro-Climate Modulation for Saving Water in Peach Orchards	2020	Frontiers in Plant Science	https://doi.org/10.3389/fpls.2020.01052	Liliana Gaeta liliana.gaeta@crea.gov.it Marcello Mastrorilli marcello.mastrorilli@crea.gov.it	Cerignola	Italy	41.33333	15.93333	Peach	Deficit irrigation	to verify the hypothesis that canopy and soil cover acting together can alleviate soil water stress when irrigation is supplied with limited volumes	Field trial	2017 and 2018	2 seasons	Two shade cover types: 10% solar reduction hail nets and 30% solar rediction shading net two soil covers in the rows: Tilled soil and mulching with biodegradable film that waas reflective on top and black surface facing the soil two irrigation regimes: full irrigation (100% of water lost by evapotranspiration restored) and 50% irrigation (50% of evapotranspiration restored) / 75% irrigation in th…	Y	N	Y	N/A	N/A	Compared to the control treatment (hail net coverage, soil tillage, and full irrigation), the innovative management (DI + shading hail net + mulching) reduced seasonal volumes of irrigation water (−25%) and increased both final yield (+36%) and WPI (+53%)	N/A	See adaptation																Y
search	21	Carbonell-Bojollo 2015	Carbonell-Bojollo, R., González-Sánchez, E. J., de Torres, M. R. R., Ordóñez-Fernández, R., Domínguez-Gimenez, J., & Basch, G. (2015). Soil organic carbon fractions under conventional and no-till management in a long-term study in southern Spain. Soil Research, 53(2), 113-124. https://doi.org/10.1071/sr13369	Soil organic carbon fractions under conventional and no-till management in a long-term study in southern Spain	2015	Soil Research	http://dx.doi.org/10.1071/SR13369	rosam.carbonell@juntadeandalucia.es	Seville	Spain	41.2858	-7.74128	peas, wheat, sunflower rotation	Tillage management	to compare the viability of no-till farming (NT) with conventional (traditional) tillage (TT) for improving SOC levels	Field trial	2006 to 2009	3 seasons	Conventional tillage treatment using a disc plough and a cultivator No till treatment: residue is left, tine drill is used	N	Y	N	SOC, CO2	CO2 was lower and SOC content was greater in soils under No-till largest differences were for SOC and Particulate OC content, where NT soil showed increases of >10% over TT soil. No-till releases less CO2	N/A	N/A	N/A
search	22	Carranza-Gallego 2018	Carranza-Gallego, G., Guzmán, G. I., Garcia-Ruíz, R., de Molina, M. G., & Aguilera, E. (2019). Addressing the Role of Landraces in the Sustainability of Mediterranean Agroecosystems. Sustainability, 11(21), 16, Article 6029. https://doi.org/10.3390/su11216029	Modern Wheat Varieties as a Driver of the Degradation of Spanish Rainfed Mediterranean Agroecosystems throughout the 20th Century	2018	Sustainability	https://doi.org/10.3390/su10103724	gcargal@upo.es	Sierra de Yeguas Ronda	Spain	37.12389 36.73722	-4.86861 -5.16472	Wheat	Cultivar selection	to assess if old varieties of wheat growth through traditional organic agriculture is better or worse than modern varieties of wheat in their performance to contribute to the agroecosystem considering Harvest Index and net primary productivity	Field trial	2013 to 2016	3 seasons	The same 6 old varieties and modern varieties of wheat were grown in two different organic farms. Sierra de Yeguas had a wheat, faba bean rotation with organic fertiliser inputs Ronda had a wheat, fallow, fallow rotation with no fertilisation	Y	N	Y	N/A	N/A	Biomass production is higher in old varieites cmpared to modern varieties without decreasing yield. Old varieties can increase the sustainability of rainfed Mediterranean agroecosystems at present through the improvement of soil quality, the reduction of herbicides use, and the recovery of biodiversity	N/A	No significant difference in yield	Mitigation is mentioned, but not measured. Higher SOC is assumed.								Y
search	23	Carranza-Gallego 2019	Carranza-Gallego, G., Guzmán, G. I., Soto, D., Aguilera, E., Villa, I., Infante-Amate, J., Herrera, A., & de Molina, M. G. (2018). Modern Wheat Varieties as a Driver of the Degradation of Spanish Rainfed Mediterranean Agroecosystems throughout the 20th Century. Sustainability, 10(10), 23, Article 3724. https://doi.org/10.3390/su10103724	Addressing the Role of Landraces in the Sustainability of Mediterranean Agroecosystems	2019	Sustainability	https://doi.org/10.3390/su11216029	gcargal@upo.es	Sierra de Yeguas La Zubia	Spain	37.12389 37.11861	4.86861 3.58389	wheat	crop selection	to evaluate landraces and modern cultvars under organic and conventional management in 2 separate field experiments during three growing seasons	Field trial	2013 to 2016	3 seasons	6 landraces and 6 modern cultivars grown under organic and conventional management	Y	N	Y	N/A	N/A	Landraces fromthis studyhave proved to be more competitive against weeds, even against a relevant pest of cereal fields such as Lolium, allowing for a reduction in the need for herbicide spraying in conventional agriculture and broadening the weed control options of organic farming. In addition, the higher straw biomass production can contribute to CC mitigation, along with soil quality improveme…	NA	See adaptation								Y
search	24	Cayuela 2017	Cayuela, M. L., Aguilera, E., Sanz-Cobena, A., Adams, D. C., Abalos, D., Barton, L., Ryals, R., Silver, W. L., Alfaro, M. A., Pappa, V. A., Smith, P., Garnier, J., Billen, G., Bouwman, L., Bondeau, A., & Lassaletta, L. (2017). Direct nitrous oxide emissions in Mediterranean climate cropping systems: Emission factors based on a meta-analysis of available measurement data. Agriculture Ecosystems & …	Direct nitrous oxide emissions in Mediterranean climate cropping systems: Emission factors based on a meta-analysis of available measurement data	2017	Agriculture, Ecosystems and Environment	http://dx.doi.org/10.1016/j.agee.2016.10.006	mlcayuela@cebas.csic.es, marialuz.cayuela@gmail.com, marialuz.cayuela@yahoo.es (M.L. Cayuela)	Global	Spain, Italy, Israel, Portugal, Greece, Australia, USA, Chile	Not stated		various	irrigation organic fertiliser management chemical fertiliser management	to improve our understanding of soil N2O emissions from Mediterranean cropping systems by (i) summarizing available field data of soil N2O emissions; (ii) proposing a more robust and reliable regional EF;(iii) identifying controlling factors of N2O EFs (soil type, climate variability, irrigation and N fertilizer management) as a basis for developing soil N2O mitigation strategies for regions with…	Meta-analysis	N/A	N/A	N/A	Y	Y	N	N2O	Rainfed crops have a lower EF than irrigated crops Drip irrigation had a lower EF than sprinkler methods winter cereals had lower Efs than intensive crops, like maize Higher N fertiliser had higher emissions, but the type of fertiliser was not significant.	N/A	N/A	N/A					Y											Y			Y
search	25	Celik 2019	Çelik, I., Günal, H., Acar, M., Acir, N., Barut, Z. B., & Budak, M. (2019). Strategic tillage may sustain the benefits of long-term no-till in a Vertisol under Mediterranean climate. Soil & Tillage Research, 185, 17-28. https://doi.org/10.1016/j.still.2018.08.015	Strategic tillage may sustain the benefits of long-term no-till in a Vertisol under Mediterranean climate	2019	Soil and Tillage Research	https://doi.org/10.1016/j.still.2018.08.015	icelik@cu.edu.tr (İ. Çelik)	Adana	Turkiye	37.01500	35.35750	wheat	Tillage management	to evaluate the overall effects of strategic tillage on sustainability of long-term no till management by analyzing the alteration of functional soils physical properties	Field trial	2015	1 year	Conventional tillage, reduced tillage and no tillage of a corn/soya, winter wheat rotation (soya and maize were rotated in alternate years. A once off, strategic tillage of no till was conducted in 2015	N	N	Y	N/A	N/A	Implementation of ST into conservational practices under Mediterranean climate could be a viable management option to overcome some of the disadvantages of long-term conservation tillage and thereby to improve physical soil conditions for crop growth, air and water movement	N/A	Reduced till and no till systems had higher wheat yield compared to conventional tillage and strategic tillage systems.
search	26	Cerasola 2022	Cerasola, V. A., Perlotti, L., Pennisi, G., Orsini, F., & Gianquinto, G. (2022). Potential Use of Superabsorbent Polymer on Drought-Stressed Processing Tomato (<i>Solanum lycopersicum</i> L.) in a Mediterranean Climate. Horticulturae, 8(8), 13, Article 718. https://doi.org/10.3390/horticulturae8080718	Potential Use of Superabsorbent Polymer on Drought-Stressed Processing Tomato (Solanum lycopersicum L.) in a Mediterranean Climate	2022	Horticulturae	https://doi.org/10.3390/horticulturae8080718	giuseppina.pennisi@unibo.it	Rivarolo Mantovano	Italy	45.0781	10.4678	Tomato	superabsorbent polymer (drought stress)	to assess the effects of a commercial superabsorbent polymer on the yield and quality of processing tomatoes in a Mediterranean climate under different degrees of drought stress	Field trial	2021	1 season	irrigation treatments include a restoring of 100%, 75%, and 50% of crop evapotranspiration With and without superabsorbent polymer	Y	N	Y	N/A	N/A	The present study clearly showed that SAP application to soil allowed for reducing the amount of irrigation water up to 25% of the crop requirements in processing tomato production in northern Italy	N/A	Yield was higher in times of water stress
search	27	Chaghazardi 2016	Chaghazardi, H. R., Jahansouz, M. R., Ahmadi, A., & Gorji, M. (2016). Effects of tillage management on productivity of wheat and chickpea under cold, rainfed conditions in western Iran. Soil & Tillage Research, 162, 26-33. https://doi.org/10.1016/j.still.2016.04.010	Effects of tillage management on productivity of wheat and chickpea under cold, rainfed conditions in western Iran	2016	Soil and Tillage Research	http://dx.doi.org/10.1016/j.still.2016.04.010	jahansuz@ut.ac.ir (M.R. Jahansouz)	Sonqor Kulliye	Iran	34.11667	47.60000	Wheat, chickpea	Tillage management	to study the effect of different tillage systems on productivity of wheat and chickpea, some morphological traits, economic value and some soil properties under cold rainfed conditions	Field trial	2012 to 2014	3 seasons	no till, reduced till and conventional till on wheat-chickpea rotations	N	N	Y	N/A	N/A	the yield performance of wheat and chickpea and the other measured characteristics were affected positively by the reduced tillage system and so using this system could help producers in rainfed areas to increase the water content and to decrease production cost in the chickpea and wheat production.	Reduced tillage had better economic results than no tilllage and conventional tillage	The highest yield of chickpea and wheat was in the reduced tillage system and the lowest yield in the no-till system.
search	28	Chelli-Chaaboundi 2021	Chelli-Chaabouni, A., Trad, M., Mkadmi, M., Ouerghui, I., Mlayah, O., & Jemaii, H. (2021). Pistachio performance in the southern Mediterranean: towards optimal use of genetic resources to increase productivity of rainfed agriculture. Euro-Mediterranean Journal for Environmental Integration, 6(1), 10, Article 24. https://doi.org/10.1007/s41207-020-00230-7	Pistachio performance in the southern Mediterranean: towards optimal use of genetic resources to increase productivity of rainfed agriculture	2021	Euro-Mediterranean Journal of Environmental Integration	https://doi.org/10.1007/s41207-020-00230-7	Azza Chelli‑Chaabouni azza.chelli@gmail.com; azza.chelli@iresa.agrinet.tn	Mornag	Tunisia	36.61667	10.28333	Pistachio	crop selection	to assess 8 Tunisian and Iranian pistachio varieties for optimal performance for yield efficiency	Field trial	2015 to 2017	3 years	Landrace (?) variety	Y	N	Y	N/A	N/A	higher yield efficiency of the “El Guettar”, “LG2” and “Mateur” local accessions attests to their greater adaptation to rainfed conditions. It is possible other cultivars would perform better with a low amount of supplemental irrigation during critical stages of developmnet	N/A	See adaptation								Y
search	29	Chiartas 2022	Chiartas, J. L., Jackson, L. E., Long, R. F., Margenot, A. J., & O'Geen, A. T. (2022). Hedgerows on Crop Field Edges Increase Soil Carbon to a Depth of 1 meter. Sustainability, 14(19), 17, Article 12901. https://doi.org/10.3390/su141912901	Hedgerows on Crop Field Edges Increase Soil Carbon to a Depth of 1 meter	2022	Sustainability	https://doi.org/10.3390/su141912901	jlchiartas@ucdavis.edu	Yolo County	USA	38.5714	-121.7397	Various (dominant rotation: tomato, alfalfa hay, sunflower, safflower, wine grapes, almonds ad rice)	Hedgerow	to assess the impact of hedgerows (established for 10+ years) on SOC to a depth of 1 m, by sampling all farm sites in a 100 km2 region that met criteria for hedgerow age, height, composition, and proximity to the edge of a cultivated field	Field trial	Not stated	N/A	Hedge rows were sampled in varying soil types: Yolo silt loan, Brentwood clay loam, Capay clay, Corning loam	Y	Y	N	SOC	Whole-profile (0–100 cm) SOC (kg m−2) stocks across all sites differed by management and soil type (p < 0.001) (Figure 3). Whole-profile SOC stocks were, on average, 36% greater in hedgerows. The presence of hedgerows had the strongest effect on SOC in the surface at 0–10 cm and at 50–100 cm, with the perennial cover and root systems of the hedgerows explaining much of the variation in SOC. At 20…	N/A	N/A	N/A												Y
search	30	Chrysargyris 2020	Chrysargyris, A., Xylia, P., Litskas, V., Stavrinides, M., Heyman, L., Demeestere, K., Höfte, M., & Tzortzakis, N. (2020). Assessing the Impact of Drought Stress and Soil Cultivation in Chardonnay and Xynisteri Grape Cultivars. Agronomy-Basel, 10(5), 22, Article 670. https://doi.org/10.3390/agronomy10050670	Assessing the Impact of Drought Stress and Soil Cultivation in Chardonnay and Xynisteri Grape Cultivars	2020	Agronomy	https://doi.org/10.3390/agronomy10050670	nikolaos.tzortzakis@cut.ac.cy	Limassol	Cyprus	34.81667	32.78333	Grape	tillage management	to explore the effects of tillage versus no tillage and irrigation versus no irrigation on vine growth, yield and grape quality attributes for Xynisteri and Chardonnay cultivars	Field trial	not stated	1 season	Chardonnay and Zynisteri cultivars are grown with the following variables: tillage and no tillage irrigation and no irrigation	Y	N	Y	N/A	N/A	Xynisteri cultivar performs well under no irrigation and reduced tillage and could be a good option for viticulture in Cyprus, under climate change	N/A	Xynisteri had increased yield with irrigation and non-irrigation with tillage, Chardonnay had increased yield under irrigation and tilled
search	31	Cialli 2024	Cialli, S., Trivellini, A., Carmassi, G., Incrocci, L., & Mensuali, A. (2024). Enhancing Agrobiodiversity: Designing an In Vitro Screening Protocol for <i>Solanum lycopersicum</i> L. and <i>Solanum pimpinellifolium</i> L. to Explore Responses to Salinity Stress. Horticulturae, 10(4), 14, Article 322. https://doi.org/10.3390/horticulturae10040322	Enhancing Agrobiodiversity: Designing an In Vitro Screening Protocol for Solanum lycopersicum L. and Solanum pimpinellifolium L. to Explore Responses to Salinity Stress	2024	Horticulturae	https:// doi.org/10.3390/horticulturae10040322	susanna.cialli@santannapisa.it	not stated	not stated	not stated	not stated	Tomato	cultivar	to assess the response of wild accessions of S. pimpinellifolium for potential use in enhancing the genetic traits of tomatoes	In vitro screening	not stated	one experiment	three Solanum lycopersicum cultivars and two S. pimpinellifolium accessions salt water concentrations: 0, 10, 20, 25, 30, 40, 50, 60, 70, 75, 100 %	Y	N	Y	N/A	N/A	S. pimpinellifolium exhibits greater resistance to salinity compared to S. lycopersicum, and the mechanisms employed to survive salt stress may differ between the two species	N/A	N/A									Y
search	32	Colecchia 2015	Colecchia, S. A., De Vita, P., & Rinaldi, M. (2015). Effects of Tillage Systems in Durum Wheat under Rainfed Mediterranean Conditions. Cereal Research Communications, 43(4), 704-716. https://doi.org/10.1556/0806.43.2015.015	Effects of Tillage Systems in Durum Wheat under Rainfed Mediterranean Conditions	2015	Cereal Research Communications	https://doi.org/10.1556/0806.43.2015.015	michele.rinaldi@entecra.it	Foggia	Italy	41.45	15.6	durum wheat	Tillage management	to assess the effect of conservation agriculture systems, compared to conventional tillage, on durum wheat productivity and quality under rainfed conditions	Field trial	2007 to 2009	2 years	Conventional tillage, no tillage, minimum tillage	N	N	Y	N/A	N/A	n wet years and during the first years of conversion from conventional to conservative agriculture, NT and MT are less productive than CT	N/A	Minimum till resulted in the best quality wheat production
search	33	Dachraoui 2021	Dachraoui, M; Sombrero, A (2021). Soil organic carbon accumulation and carbon dioxide emissions during a 6-year study in irrigated continuous maize under two tillage systems in semiarid Mediterranean conditions. Spanish Journal of Agricultural Research, Volume 19, Issue 1, e1102	Soil organic carbon accumulation and carbon dioxide emissions during a 6-year study in irrigated continuous maize under two tillage systems in semiarid Mediterranean conditions	2021	Spanish Journal of Agricultural Research	https://doi.org/10.5424/sjar/2021191-16260	dachraoui.maroua@gmail.com	Valladolid	Spain	41.7064	-4.6933	maize	Tillage management	to evaluate the effects of conventional tillage (CT) and no tillage (NT) systems on the soil organic carbon (SOC) changes, CO2 emissions and their relation with soil temperature and grain yield in a monoculture of irrigated maize during six years	Field trial	2011 to 2017	5 years	Conventional tillage: mouldboard plough and sowing with a conventional drill No till: chemical weed control and a no-till seed drill	Y	Y	N	SOC, CO2	SOC stock was 36% greater under NT (18.3 Mg C ha-1) than under CT (13.5 Mg C ha-1 ) with a rate of 1.61 and 1.13 Mg ha-1 yr-1 respectively at 0-10 cm depth. In the lower layers, SOC values were 7 and 3% higher in NT plots than in CT plots at 10-20 and 20-30 cm depths. CO2 emissions were lower in the No till crops	N/A	N/A	Yield increased in the No till crops
search	34	De santis 2024	De Santis, M. A., Giuzio, L., Tozzi, D., Soccio, M., & Flagella, Z. (2024). Impact of No Tillage and Low Emission N Fertilization on Durum Wheat Sustainability, Profitability and Quality. Agronomy-Basel, 14(12), 17, Article 2794. https://doi.org/10.3390/agronomy14122794	Impact of No Tillage and Low Emission N Fertilization on Durum Wheat Sustainability, Profitability and Quality	2024	Agronomy	https://doi.org/10.3390/ agronomy14122794	michele.desantis@unifg.it (M.A.D.S.); zina.flagella@unifg.it (Z.F.)	Foggia	Italy	41.2896666	15.4446389	durum wheat	tillage management chemical fertiliser organic fertiliser nitrogen inhibitor	to evaluate the hypothesis that the combination of no-tillage and low-emission nitrogen fertilizers might improve the sustainability of durum wheat production in the context of climate-smart agriculture	Field trial	2021 to 2022	2 crop season	two different genotypes, Marco Aurelio (high protein content) and Saragolla (higher adaptability), subjected to no tillage (NT) vs. conventional tillage (CT) and to two fertilization strategies (standard vs. low emission plus an unfertilized control)	Y	N	Y	N/A	N/A	NT was associated with an improvement in yield (+15%) and quality, i.e., micronutrients (Fe, Zn) and antioxidant capacity (+15%), in the drier crop year	Low emission fertilization, also carried out using controlled release fertilizers, did not compromise yield and quality but led to an advantage in terms of sustainability and economic profitability with respect to the standard fertilization	See adaptation	Mitigation is assumed, not measured.				Y													Y	Y
search	35	Deng 2018	Deng, J., Li, C., Burger, M., Horwath, W. R., Smart, D., Six, J., et al. (2018). Assessing short-term impacts of management practices on N2O emissions from diverse Mediterranean agricultural ecosystems using a biogeochemical model. Journal of Geophysical Research: Biogeosciences, 123, 1557–1571.	Assessing Short-Term Impacts of Management Practices on N2O Emissions From Diverse Mediterranean Agricultural Ecosystems Using a Biogeochemical Model	2018	Journal of Geophysical Research: Biogeosciences	https:// doi.org/10.1029/2017JG004260	jia.deng@unh.edu	California	USA	38.5833 38.5833 38.4333 38.4333 36.6667 38.4333 38.4333 39.0500 39.0500 38.9667 38.9667	-121.8333 -121.8333 -121.8667 -121.8667 -121.6000 -121.8667 -121.8667 -121.9833 -121.9833 -122.0833 -122.0833	alfalfa, winter wheat, lettuce, grape vine, and almond tree	Tillage management	to test DeNitrification-DeComposition (DNDC), against N2O measurements from five cropping systems (alfalfa, wheat, lettuce, vineyards, and almond orchards) representing diverse environmental conditions and FMPs.	Field trial	2009 to 2011	2 years	various considering tillage, fertiliser, irrigation, cover crop	Y	Y	N	N2O	Compared to conventional tillage, reduced or no tillage slightly reduced the N2O emission and the efficiency of reduction varied across the tested cropping systems (Figure 7). The annual total N2O emissions were decreased by 12%, 8%, 13%, and 2%, respectively, for the wheat, lettuce, vineyard, and almond orchard Compared to the baseline, a decrease of N application by 20% would lower the annual N…	N/A	N/A	N/A	The study included a field trial to compare against the model. Only field trial outputs are included here.
search	36	Devkota 2022	Devkota, M., Devkota, K. P., & Kumar, S. (2022). Conservation agriculture improves agronomic, economic, and soil fertility indicators for a clay soil in a rainfed Mediterranean climate in Morocco. Agricultural Systems, 201, 14, Article 103470. https://doi.org/10.1016/j.agsy.2022.103470	Conservation agriculture improves agronomic, economic, and soil fertility indicators for a clay soil in a rainfed Mediterranean climate in Morocco	2022	Agricultural Systems	https://doi.org/10.1016/j.agsy.2022.103470	m.devkota@cgiar.org (M. Devkota)	Merchouch	Morocco	33.6113889	-6.7125	barley (Hordeum vulgare L), chickpea (Cicer arietinum L.), lentil (Lens culinaris, Medik.), and wheat (Triticum aestivum L.)	tillage management	to evaluate agronomic, economic, and soil fertility indicators under CA and conventional tillage (CT) using field experimentation (medium-term) and simulation modeling (long-term) for a clay soil of a rainfed Mediterranean environment	Field trial	2015 to 2019	5 years	Conservation agriculture and conventional till practices of a cereal-legume rotation: wheat, chickpea, barley, lentil	Y	Y	Y	SOC	Conservation agriculture resulted in an increase of SOC by 7%	adoption of CA had higher systemlevel grain yield (by 20%) and straw yield (by 8%), improved soil fertility (SOC by 7%, P level by 6%, K level by 4%), higher PUE (by 13%), improved available soil moisture (by 14%), lower production cost (by 13%), and greater income (by 19%) and net return (by 41%) compared to the CT field	he increase in gross revenue under CA was due to reduced total production costs, mainly associated with tillage operation and higher grain and straw yields	See adaptation
search	37	Diacono 2016	Diacono, M., Fiore, A., Farina, R., Canali, S., Di Bene, C., Testani, E., & Montemurro, F. (2016). Combined agro-ecological strategies for adaptation of organic horticultural systems to climate change in Mediterranean environment. Italian Journal of Agronomy, 11(2), 85-91. https://doi.org/10.4081/ija.2016.730	Combined agro-ecological strategies for adaptation of organic horticultural systems to climate change in Mediterranean environment	2016	Italian Journal of Agronomy	https://doi.org/10.4081/ija.2016.730	mariangela.diacono@crea.gov.it	Metaponto	Italy	40.4	16.8	Cauliflower and tomato	Hydraulic arrangement, crop rotation, agroecological service crop, organic fertiliser	to assess the suitability (and the best combination) of agro-ecological techniques as potential resilience strategies in organic horticultural systems in a Mediterranean environment	Field trial	2014 to 2015	1 season	Cauliflower with medic living mulch: early sowing / concurrent sowing, anaerobic digestate fertiliser / composted municipal solid organic watste/ commercial humified organic fertiliser, unfertilised control tomato: service crop of vetch/barley/mixture were cultivated before tomato planting, then incorporated as green manure / mulched / fallow control, fertilised with anaerobic digestate / commerc…	Y	N	Y	N/A	N/A	outcomes suggest that organic vegetable cropping systems, designed following agro-ecological principles, are able to sustain yield of cash crops in rotation, in spite of changes in temperature and rainfall of the study site		See adaptation	preliminary study						Y						Y						Y
search	38	Diacono 2018	Diacono, M., Persiani, A., Alfano, V., Monteforte, A., & Montemurro, F. (2023). Fertilization Strategies on Fennel Crop in the Mediterranean Environment: Agronomic Performance, Costs and Sustainability Assessment. Agriculture-Basel, 13(5), 18, Article 1048. https://doi.org/10.3390/agriculture13051048	Agronomic performance and sustainability indicators in organic tomato combining different agro-ecological practices	2018	Nutrient Cycle Agroecosystems	https://doi.org/10.1007/s10705-018-9933-7	mariangela.diacono@crea.gov.it; francesco.montemurro@crea.gov.it	Metaponto	Italy	40.40000	16.80000	Tomato	Cover crops organic fertiliser	(1) to study the best synergistic combination of a set of agro-ecological techniques, as potential adaptation strategies for organic agro-ecosystems; (2) to evaluate the sustainability of the agro-ecological techniques by assessing system energetic performance.	Field trial	2013 to 2015	2 years	service crop of vetch/barley/mixture were cultivated before tomato planting, then incorporated as green manure / mulched / fallow control, fertilised with anaerobic digestate / commercial humified organic fertiliser / unfertilised control	Y	N	Y	N/A	N/A	the choice of cover crop species and their termination techniques and organic fertilization cannot be universally defined, especially with varying annual weather conditions, as occurred in this research, which substantially influenced cover crop and weed production. Our results also indicated that in the climate change context, the ridge-furrow system in association with cover crops can be consid…	N/A	in the first year, the combination of commercial organic fertilizer and vetch gave both the highest tomato marketable and total yield. In he second year, these decreased by more than 30%. Green manure cover crop produced twice as much as roller crimper cover crop on average.						Y													Y
search	39	Diacono 2023	Diacono, M., Persiani, A., Canali, S., & Montemurro, F. (2018). Agronomic performance and sustainability indicators in organic tomato combining different agro-ecological practices. Nutrient Cycling in Agroecosystems, 112(1), 101-117. https://doi.org/10.1007/s10705-018-9933-7	Fertilization Strategies on Fennel Crop in the Mediterranean Environment: Agronomic Performance, Costs and Sustainability Assessment	2023	Agriculture	https://doi.org/10.3390/ agriculture13051048	alessandro.persiani@crea.gov.it (A.P.); vincenzo.alfano@crea.gov.it (V.A.)	Metaponto	Italy	40.40	16.80	Fennel	chemical fertiliser management organic fertiliser management	to compare, under Mediterranean conditions, two different organic fertilizers applied at 100% and 50% doses, with mineral fertilization and an unfertilized control	Field trial	2020 to 2021	2 seasons	a. 100% compost of municipal solid waste (MSW) b.50% of compost of MSW, 50% urea c. 100% compost of MSW inoculated with slected bacterium d. 50% compost of MSW inoculated with 50% urea e. 50% mineral fertiliser with 50% urea f. non fertilised control	Y	N	Y	N/A	N/A	The treatments with the compost of MSW inculated ahd the best yield and lower costs	the higher amount of fertilizer needed in the organic treatments, with respect to the mineral ones, increased both the total cost of the fertilizer distributed (up to exceeding the cost of the mineral fertilization in T1) and the cost of distribution	See adaptation					Y														Y
search	40	Eshel 2015	Eshel, G., Egozi, R., Goldwasser, Y., Kashti, Y., Fine, P., Hayut, E., Kazukro, H., Rubin, B., Dar, Z., Keisar, O., & DiSegni, D. M. (2015). Benefits of growing potatoes under cover crops in a Mediterranean climate. Agriculture Ecosystems & Environment, 211, 1-9. https://doi.org/10.1016/j.agee.2015.05.002	Benefits of growing potatoes under cover crops in a Mediterranean climate	2015	Agriculture, Ecosystems and Environment	http://dx.doi.org/10.1016/j.agee.2015.05.002	eshelgil@gmail.com, eshelg@moag.gov.il (G. Eshel)	Mishmeret	Israel	32.22556	34.88944	potato	cover crop	to: (i) assess whether CC can make a positive contribution to soil and water conservation in the Mediterranean region, and (ii) enhance our agrotechnological capacity to allow sowing and growing (and perhaps also harvesting) of potatoes while the soil is under a CC, without reducing profitability	Field trial	2011 to 2014	3 seasons	(varied by year) year 3: Bare soil ridges were the control, cover crop with no pretreatment, covercrop mowed, covercrop rolled with a roller and crimper	N	N	Y	N/A	N/A	potato production under cover crops (oats) generates no yield reduction or nutrient deficiencies, reduces soil erosion by 95% and reduces runoff by more than 60%. Incorporation of CC in potato-growing practices also results in suppression of weeds (both species and biomass)	1.3% savings in variable costs of production by adopting cover crops	No yield reduction from cover crops						Y
search	41	Espejo-Perez 2013	Espejo-Pérez, A. J., Rodríguez-Lizana, A., Ordóñez, R., & Giráldez, J. V. (2013). Soil Loss and Runoff Reduction in Olive-Tree Dry-Farming with Cover Crops. Soil Science Society of America Journal, 77(6), 2140-2148. https://doi.org/10.2136/sssaj2013.06.0250	Soil Loss and Runoff Reduction in Olive-Tree Dry-Farming with Cover Crops	2013	Soil Water Management and Conservation	https://doi.org/10.2136/sssaj2013.06.0250	g82espea@uco.es	Andelusia	Spain	38.05199 38.03383 38.23497 38.33464 37.83145 37.95153 37.58444 37.58436	-4.81861 -4.76831 -5.30200 -4.71700 -3.95803 -5.58606 -6.65028 -6.65086	Olive	Cover crop	to evaluate the reduction in the intensity of soil loss and runoff in those plots, comparing cover crops (CC) with conventional tillage (CT)	Field trial	2003 to 2005	2 years	Cover crop and conventional tillage	N	N	Y	N/A	N/A	he cover crop diminished soil losses in all the experimental plots with an average of 76%. Water loss was also reduced, although to a lesser extent, in six of the eight fields, with an average of 22%. Additionally, the results showed the great influence of the cover percentage in the decrease in soil loss and in the concentration of sediments in the runoff.	N/A	See adaptation						Y
search	42	Fagnano 2012	Fagnano, M., Fiorentino, N., D'Egidio, M. G., Quaranta, F., Ritieni, A., Ferracane, R., & Raimondi, G. (2012). Durum Wheat in Conventional and Organic Farming: Yield Amount and Pasta Quality in Southern Italy. Scientific World Journal, 9, Article 973058. https://doi.org/10.1100/2012/973058	Durum Wheat in Conventional and Organic Farming: Yield Amount and Pasta Quality in Southern Italy	2012	The Scientific World Journal	https://doi.org/10.1100/2012/973058	fagnano@unina.it	Naples	Italy	40.6166667	14.9666667	durum wheat	cultivar chermical fertiliser organic fertiliser	to assess the influence of cultivars and cropping system on agronomic, milling, technological, sensory, and sanitary quality of durum wheat and pasta has been evaluated within a local farm-to-table food chain	Field trial	2019 to 2010	1 year	5 cultivars, conventional agriculture with chemical fertiliser compared to organic agriculture system	N	N	Y	N/A	N/A	Saragolla showed the highest yield and a high pasta quality in all the experimental conditions, thus proving to be a cultivar very adaptable to the lower N availability occurred under organic farming. Yield and quality was better in conventional agriculture than organic trials overall.	N/A	See adaptation					Y				Y										Y
search	43	Falcon-Pineiro 2024	Falcón-Piñeiro, A., Zaguirre-Martínez, J., Ibáñez-Hernández, A. C., Guillamón, E., Santander, K., Barrero-Domínguez, B., López-Feria, S., Garrido, D., & Baños, A. (2024). Evaluation of the Biostimulant Activity and Verticillium Wilt Protection of an Onion Extract in Olive Crops (<i>Olea europaea</i>). Plants-Basel, 13(17), 20, Article 2499. https://doi.org/10.3390/plants13172499	Evaluation of the Biostimulant Activity and Verticillium Wilt Protection of an Onion Extract in Olive Crops (Olea europaea)	2024	Plants	https://doi.org/10.3390/plants13172499	abarjona@dmcrc.com	Cordoba and Jaen	Spain	37.51819 38.05669	-3.44229 -1.97449	olive	Biostimulant activity and antifungal	to assess the dual biostimulant and antifungal activity of an onion extract formulation rich in organosulfur compounds	Field trial and pot trial	2021 to 2022	14 months	Treatmnet and contorl	N	N	Y	N/A	N/A	onion extract effectively reduces oxidative stress and pathogen colonization, while enhancing plant development and fruit fat content. This supports the use of the onion extract formulation as a promising, sustainable alternative to chemical treatments for improving olive crop resilience	N/A	N/A	Only the orchard trial information was included here. A camber trial and a trial of young trees was also conducted.			Y
search	44	Farina 2018	Farina, R., Testani, E., Campanelli, G., Leteo, F., Napoli, R., Canali, S., & Tittarelli, F. (2018). Potential carbon sequestration in a Mediterranean organic vegetable cropping system. A model approach for evaluating the effects of compost and Agro-ecological Service Crops (ASCs). Agricultural Systems, 162, 239-248. https://doi.org/10.1016/j.agsy.2018.02.002	Potential carbon sequestration in a Mediterranean organic vegetable cropping system. A model approach for evaluating the effects of compost and Agro-ecological Service Crops (ASCs)	2018	Agricultural Systems	https://doi.org/10.1016/j.agsy.2018.02.002	roberta.farina@crea.gov.it (R. Farina)	Monsampolo del Tronto	Italy	42.8833	13.8000	tomato, melon, fennel, lettuce, cauliflower, bean	cover crops organic fertiliser	to determine the effect of compost application, of different ASCs termination and incorporation techniques and their interactions on soil C dynamic in an organic vegetable system	Field trial	2012 to 2014	2 seasons	i) the alternative termination of the cover crop (barley) with roller crimper technique compared to green manure and ii) the application of compost (not applied before) in different doses.he barley managements were: green manure (GMB); flattened (FB) by the use of a roller crimper; no barley (NB) as control. The compost (Cp) doses were: 0, 15 and 30 MgC ha−1	N	Y	N	SOC	All treatments increased SOC. No significant difference found in different types of termination of cover crop nor interaction with compost and cover crops	N/A	N/A	N/A						Y													Y
search	45	Fernandez Ortega 2024	Fernández-Ortega, J., Fanlo, R., & Cantero-Martínez, C. (2024). Greenhouse gas emissions during alfalfa cultivation: How do soil management and crop fertilisation of preceding maize impact emissions? Field Crops Research, 318, 12, Article 109602. https://doi.org/10.1016/j.fcr.2024.109602	Greenhouse gas emissions during alfalfa cultivation: How do soil management and crop fertilisation of preceding maize impact emissions?	2024	Field Crops Research	https://doi.org/10.1016/j.fcr.2024.109602	jesus.fernandez@udl.cat	Agramunt	Spain	41.8000	1.1167	Alfalfa	Tillage Management chemical fertiliser	to (i) quantify emissions of N2O, CO2 and CH4 in an alfalfa crop following a maize cropping scenario; (ii) to determine which tillage system generates the lowest GHG emissions, and; (iii) to determine how N fertilisation from a preceding intensive maize crop affects GHG emissions during alfalfa cropping period	Field trial	2019 to 2021	3 years	Conventional tillage and no tillage, 0, 200 and 400 kg N per ha mineral N (applied to preceding maize crops) alfalfa was grown on all plots, preceded by maize	Y	Y	N	N2O, CH4, CO2	Diversifing continous maize cropping with alfalfa results in reduced GHG emissions.	N/A	N/A	N/A																			Y
search	46	Fernandez-Aparicio 2011	Fernández-Aparicio, M., Shtaya, M. J. Y., Emeran, A. A., Allagui, M. B., Kharrat, M., & Rubiales, D. (2011). Effects of crop mixtures on chocolate spot development on faba bean grown in mediterranean climates. Crop Protection, 30(8), 1015-1023. https://doi.org/10.1016/j.cropro.2011.03.016	Effects of crop mixtures on chocolate spot development on faba bean grown in mediterranean climates	2011	Crop Production	https://doi.org/10.1016/j.cropro.2011.03.016	diego.rubiales@ias.csic.es (D. Rubiales)	Cordoba Beja Khadoorie Kafr El-Sheik	Spain Tunisia Egypt Palestinian territories	37.85 36.73 32.30 30.78	-4.80 9.22 35.02 30.98	faba bean	crop selection	to discern the effects ofspecies mixtures in the development ofB. fabae in faba bean in different environments across the Mediterranean area, identifying optimal species mixtures with the highest suppressive potentials and to investigate some candidate mechanisms of suppression	Field trial	2005 to 2007	2 seasons	monocrop, intercrop with cereal, intercrop with legume	N	N	Y	N/A	N/A	ntercrops with cereals can be an effective strategy for control of chocolate spot in faba bean, especially with barley and oat.	N/A	N/A								Y
search	47	Fernandez-Crespo 2022	Fernández-Crespo, E., Liu-Xu, L., Albert-Sidro, C., Scalschi, L., Llorens, E., González-Hernández, A. I., Crespo, O., Gonzalez-Bosch, C., Camañes, G., García-Agustín, P., & Vicedo, B. (2022). Exploiting Tomato Genotypes to Understand Heat Stress Tolerance. Plants-Basel, 11(22), 21, Article 3170. https://doi.org/10.3390/plants11223170	Exploiting Tomato Genotypes to Understand Heat Stress Tolerance	2022	Plants	https:// doi.org/10.3390/plants11223170	ecrespo@uji.es	not stated	Spain (not stated)	not stated	not stated	Tomato	heat tolerance (cultivar selection)	to characterize traditional tomato varieties (or tomato landraces) of different areas of the Mediterranean basin against heat stress	Pot trial	not stated	once off	four traditional tomato varieties from the Mediterranean basin and two commercial genotypes were selected to characterize their responses at high temperatures	Y	N	Y	N/A	N/A	classify the tomato genotypes as: heat-sensitive: TH-30, ADX2; intermediate: ISR-10 and Ailsa Craig; heat-tolerant: MM and MO-10.	N/A	N/A									Y
search	48	Fernandez-Getino 2014	Fernández-Getino, A. P., Santín-Montanyá, M. I., Zambrana, E., de Andrés, E. F., & Tenorio, J. L. (2015). The response of barley to rainfall and temperature in different tillage and crop rotation systems in semi-arid conditions. Annals of Applied Biology, 166(1), 143-153. https://doi.org/10.1111/aab.12172	The response of barley to rainfall and temperature in different tillage and crop rotation systems in semi-arid conditions	2014	Annals of Applied Biology	https://doi.org/10.1111/aab.12172	isantin@inia.es	Madrid	Spain	40.5333333	-3.3333333	Barley	tillage management crop rotation	to examine the medium-term impact on barley crops of climatic variability (rainfall and temperature), the response to different tillage systems (TS) and rotation system	Field trial	1994 to 2001	7 seasons	conventional tillage / minimum tillage / no tillage barley monoculture/ barley-fallow / barley-vetch	Y	N	Y	N/A	N/A	Tillage did not have an impact barley monoculture had worst yield water availability is key during critical growth stages	N/A	See adaptation							Y
search	49	Fernandez-Lobato 2021	Fernández-Lobato, L., García-Ruiz, R., Jurado, F., & Vera, D. (2021). Life cycle assessment, C footprint and carbon balance of virgin olive oils production from traditional and intensive olive groves in southern Spain. Journal of Environmental Management, 293, 14, Article 112951. https://doi.org/10.1016/j.jenvman.2021.112951	Life cycle assessment, C footprint and carbon balance of virgin olive oils production from traditional and intensive olive groves in southern Spain	2021	Journal of Environmental Management	https://doi.org/10.1016/j.jenvman.2021.112951	dvera@ujaen.es	Jaen	Spain	37.7790	-3.7794	olives	Farming intensification	to estimate the environmental impacts, carbon (C) footprint and carbon balance of producing virgin origin olive oil in Spain from four traditional rainfed, four irrigated, and three intensive olive farms, including the processing phase	Field trial	2021	3 seasons	traditional rainfed, traditional irrigation, intensive	Y	Y	N	SOC, CO2	Farming phase: 1.80 to 2.41 kg CO2 eq., 1.59–2.78 kg CO2 eq. and 2.28–3.26 kg CO2 eq. for traditional rainfed, traditional irrigated and intensive farming systems, C footprint (per kg olive oil) was significantly more negative for traditional rainfed	N/A	N/A	N/A	Only the farming phase was considered from a broader analysis scope that considered processing as well. the farming phase accounted for 76.3% of the EIs. Therefore, to reduce the impact of the virgin olive oils production, most of the efforts should be made especially in the farming phase. Only carbon balance was considered				Y											Y				Y
search	50	Fiorentini 2024	Fiorentini, M., Orsini, R., Zenobi, S., Francioni, M., Rivosecchi, C., Bianchini, M., di Tella, B., Dottavio, P., Ledda, L., Santilocchi, R., & Deligios, P. (2024). Soil tillage reduction as a climate change mitigation strategy in Mediterranean cereal-based cropping systems. Soil Use and Management, 40(2), 17, Article e13050. https://doi.org/10.1111/sum.13050	Soil tillage reduction as a climate change mitigation strategy in Mediterranean cereal-­based cropping systems	2024	Soil Use and Management	https://doi.org/10.1111/sum.13050	r.orsini@univpm.it	Agugliano	Italy	43.5333333	13.3666667	durum wheat	tillage management Organic fertilizer management	to investigate the most cost-­effective agricultural strategies that can prevent production losses and ensure global food security	Field trial	2018 to 2023	5 seasons	No till, conventional till nitrogen fertiliser levels: 0, 90, 180 kg/ha	Y	N	Y	N/A	N/A	The most important driver for durum wheat production was N fertilization. However, in the absence of N fertilization, no tillage showed a higher yield (+1.2 t ha−1) than conventional tillage due to the accumulation of organic matter in the soil. The highest fertilization rate (180 Kg N ha−1) resulted in the highest wheat yields regardless of soil management and thermo-pluviometric trends (5.78 t …	N/A	See adaptation																			Y
search	51	Flower 2012	Flower, K. C., Cordingley, N., Ward, P. R., & Weeks, C. (2012). Nitrogen, weed management and economics with cover crops in conservation agriculture in a Mediterranean climate. Field Crops Research, 132, 63-75. https://doi.org/10.1016/j.fcr.2011.09.011	Nitrogen, weed management and economics with cover crops in conservation agriculture in a Mediterranean climate	2012	Field Crops Research	https://doi.org/10.1016/j.fcr.2011.09.011	ken.flower@UWA.edu.au	Mingenew Cundredin	Australia	115.28333 117.23333	-28.93333 -31.63333	wheat and barley	cover crops (for weed control)	to test the hypotheses that (i) oat cover crops with a high biomass will immobilise less soil nitrogen than harvested cereals, and (ii) the inclusion of oat cover crops in a cereal rotation can significantly improve weed control in a conservation agriculture system	Field trial	2007 to 2010	4 seasons	maximum carbon input: residue retention, cereal rotation (for example, wheat, barley, oat), no tillage maximum profit: low residue retention, cereal, cereal, legume tillage allowed	N	N	Y	N/A	N/A	managed pasture, with herbicide control of weed seed set, appears to be a better option than oat cover crops because of the relatively low cost and increased soil water storage. The present results show the effectiveness of oat cover crops and grass pasture in controlling weeds, even in continuous cereal rotations. Two consecutive years of cover crop would be required for good annual ryegrass con…	Including oats as a cover crop reduced gros margin in the short term due to the high seed cost.	N/A						Y
search	52	Flower 2017	Flower, K. C., Ward, P. R., Cordingley, N., Micin, S. F., & Craig, N. (2017). Rainfall, rotations and residue level affect no-tillage wheat yield and gross margin in a Mediterranean-type environment. Field Crops Research, 208, 1-10. https://doi.org/10.1016/j.fcr.2017.03.012	Rainfall, rotations and residue level affect no-tillage wheat yield and gross margin in a Mediterranean-type environment	2017	Field Crops Research	http://dx.doi.org/10.1016/j.fcr.2017.03.012	ken.flower@uwa.edu.au`	Cunderdin	Australia	-31.63333	117.23333	wheat	crop rotation residue retention	to understand the effects of rotation and residue retention on rainfed wheat establishment, yield and gross margin under a no-tillage system	Field trial	2007 to 2015	9 years	Wheat monoculture cereal rotation diverse rotation	N	N	Y	N/A	N/A	diverse rotation showing higher grain protein concentration in most years and improved wheat yield over time	Monoculture wheat and cereal rotation had the highest cumulative 9-year average gross margins	diverse rotation showing higher grain protein concentration in most years and improved wheat yield over time							Y															Y
search	53	Forte 2017	Forte, A., Fagnano, M., & Fierro, A. (2017). Potential role of compost and green manure amendment to mitigate soil GHGs emissions in Mediterranean drip irrigated maize production systems. Journal of Environmental Management, 192, 68-78. https://doi.org/10.1016/j.jenvman.2017.01.037	Potential role of compost and green manure amendment to mitigate soil GHGs emissions in Mediterranean drip irrigated maize production systems	2017	Journal of Environmental Management	http://dx.doi.org/10.1016/j.jenvman.2017.01.037	anforte@unina.it	Battipaglia	Italy	40.6167	14.9667	maize	organic fertilisation	to assess the pattern of soil CO2 and N2O fluxes in response to the replacement of a typical bare fallowemaize cycle under urea fertilization (130 kg N ha-1 y-1) (CONV) with: (i) bare fallow-maize cycles under two doses of compost (COM1 and COM2, 130 and 260 kg N ha-1 y-1, respectively) and (ii) a vetch-maize cycle, with vetch incorporation as green manure (130 kg N ha-1 y-1) (GMAN)	Field trial	2007 to 2009	1 year	Conventional system: fallow-maize system with urea fertiliser Compost treatments: Fallow-maize system with less (130 kg N per ha per year) and more (260 kg N per ha per year) compost Green manure treatment: vetch-maize system where the vetch is incorporated as green manure	Y	Y	N	N2O, CO2	green manure had the lowest GWP considering CO2 and N2O (-27%) compared to fallow-maize fertilised by urea compost treatments had slightly higher GWP than the fallow-maize fertilised by urea	N/A	N/A	Maize crop yields, in the year of GHGs monitoring (2008) conventional system: 15.5 Mg d.m. per ha Green manure treatment had comparable yield: 12.5 Mg d.m. per ha Compost treatments had reduced yield lower compost addition: 6.9 Mg d.m. per ha, higher compost addition 9.3 Mg d.m. per ha																			Y
search	54	Forte 2019	Forte, A., & Fierro, A. (2019). Denitrification Rate and Its Potential to Predict Biogenic N<sub>2</sub>O Field Emissions in a Mediterranean Maize-Cropped Soil in Southern Italy. Land, 8(6), 25, Article 97. https://doi.org/10.3390/land8060097	Denitrification Rate and Its Potential to Predict Biogenic N2O Field Emissions in a Mediterranean Maize-Cropped Soil in Southern Italy	2019	Land	https://doi.org/10.1016/S1002-0160(21)60032-210.3390/land8060097	anforte@unina.it	Campania	Italy	40.5238	14.9574	maize	organic fertiliser management	to investigate the pattern of the denitrification rate and the soil field N2O fluxes in an irrigated fine-textured maize-cropped soil in Campania Region (Southern Italy)	Field trial	2005 and 2006	2 seasons	standard, high and low late fertilisation (post-emergence) management	Y	Y	N	N2O	Excess fertiliser in post emergence can result in incresed NO. Aa further optimization of the N fertilization reducing the conventional urea-N supply rates appears desirable, in order to achieve high crop productivity without exacerbating N2O emissions or the risk of nitrate leaching	N/A	N/A	N/A																			Y
search	55	Francioni 2022	Francioni, M., Palmieri, M., Fiorentini, M., Deligios, P. A., Monaci, E., Vischetti, C., Rossa, Ü., Trozzo, L., Bianchini, M., Rivosecchi, C., Ledda, L., Orsini, R., Santilocchi, R., & D'Ottavio, P. (2024). Scarcity of P-fertilisers: Humic-complexed phosphate as an adaptive solution for wheat and maize under rainfed conditions. European Journal of Agronomy, 156, 11, Article 127143. https://doi.or…	Management of a Mediterranean Forage/Cereal-Based Cropping System: An Ecosystem Service Multisectoral Analysis in the Perspective of Climate Change	2022	Atmosphere	https:// doi.org/10.3390/atmos13030487	.trozzo@univpm.it (L.T.); m.toderi@univpm.it (M.T.)	Marche Region	Italy	43.55000	13.41667	Wheat and Alfalfa	crop selection (perrenial forage legume vs cereal crop	to evaluate the synergies and tradeoffs between ecosystem services that are generated by two alternative management systems compared to the commonly adopted termination of perennial forage legumes (e.g., alfalfa) followed by a cereal crop (e.g., wheat)	Field trial	2017 to 2019	2 seasons	i) alfalfa termination followed by sowing of durum wheat (Triticum turgidum L. ssp. durum (Desf.) Husn.) for two cropping seasons (WW, control); (ii) alfalfa termination followed by single amendment with 60 Mg ha−1 biochar and then by sowing of durum wheat for two cropping seasons (WWB60); and (iii) extension of the 6-year-old alfalfa field for two additional cropping seasons (AEXT)	Y	Y	Y	N2O, CH4, CO2	Adding biochar before sowing wheat doubled the soil carbon without increasing the other GHGs	Extending the growth of alfalfa would be preferable to limit erogion and providing for regulating and provisioning services Terminating the alfalfa to grow wheat with biochar did not negatively impact supporting services.	N/A	Exension of alfalfa had the highest biomass								Y
search	56	Francioni 2024	Francioni, M., Trozzo, L., Baldoni, N., Toderi, M., Bianchini, M., Kishimoto-Mo, A. W., & D'Ottavio, P. (2022). Management of a Mediterranean Forage/Cereal-Based Cropping System: An Ecosystem Service Multisectoral Analysis in the Perspective of Climate Change. Atmosphere, 13(3), 17, Article 487. https://doi.org/10.3390/atmos13030487	Scarcity of P-fertilisers: Humic-complexed phosphate as an adaptive solution for wheat and maize under rainfed conditions	2024	European Journal of Agronomy	https://doi.org/10.1016/j.eja.2024.127143	m.fiorentini@staff.univpm.it	Aguguliano	Italy	43.54014	13.37506	wheat and maize	organic fertiliser management (phosphate)	to assess the response of a durum wheat–maize rotation to various rates of liquid organo-mineral P-complexes (humic-complexed phosphate; HCP) in comparison to granular triple superphosphate (TSP)	Field trial	2015 and 2016	2 seasons	No P-fertilisation Low P-fertilisation as HCP (4 kg for wheat, 5kg for maize per ha) Low P-fertilisation as TSP (4 kg for wheat, 5kg for maize per ha) high P-fertilisation as HCP (8 kg for wheat, 10kg for maize per ha) high P-fertilisation as TSP (8 kg for wheat, 10kg for maize per ha)	Y	N	Y	N/A	N/A	For wheat, HCP applied at a rate of 8 kg per ha of P resulted in a higher grain yield and protein content, increased P uptake and improved use and agronomic effciency. For maize, under favourable rainfall conditions, 5 or 10 kg per ha of HCP had similar outcomes, but in a dry year 10 kg HCP did not have higher yield compared to the control.	N/A	See adaptation																			Y
search	57	Garcia-Gutierrez 2023	García-Gutiérrez, S., Guardia, G., Montoya, M., Vallejo, A., Cardenas, L. M., & García-Marco, S. (2023). - Dry rainfed conditions are key drivers of the effect of conservation tillage and a nitrification inhibitor on N fate and N2O emissions: A field 15N tracing study. - 432. - https://www.scopus.com/inward/record.uri?eid=2-s2.0-85149866416&doi=10.1016%2fj.geoderma.2023.116424&partnerID=40&md5=96…	Dry rainfed conditions are key drivers of the effect of conservation tillage and a nitrification inhibitor on N fate and N2O emissions: A field 15N tracing study	2023	Geoderma	https://doi.org/10.1016/j.geoderma.2023.116424	sandra.garcia@upm.es (S. García-Guti´errez)	Madrid	Spain	40.4171	-3.4958	Barley	Tillage management chemical fertiliser management nitrogen inhibitor	to evaluate, using 15N tracing, how tillage management and the use of DMPSA with ammonium nitrate could affect N2O emissions as well as the fate of synthetic N	Field trial	2018 and 2019	1 season	no till, conventional till no fertiliser, calcium ammonium nitrate, calcium ammonium nitrate with nitrification inhibitor	Y	Y	N	N2O	Most N2O came from a wet event in the fallow season, irrespective of tillage and fertiliser type. opportunities to abate these rewetting incidences may be limited. The treatment without fertiliser had the lowest emissions during the growing season (before harvest) . Fertiliser with the nitrogen inhibitor had 60% less cumulative N2O than without the inhibitor before harvest.	N/A	N/A	N/A					Y													Y
search	58	Garcia-Tejero 2024	García-Tejero, I. F., Herencia-Galán, J. F., Rodríguez, B. C., Calderón-Pavón, A., Navarro, J. A., Rubio-Casal, A. E., & Zuazo, V. H. D. (2024). Integrating Deficit Irrigation Strategies and Soil-Management Systems in Almond Orchards for Resilient Agriculture. Agronomy-Basel, 14(10), 19, Article 2288. https://doi.org/10.3390/agronomy14102288	Integrating Deficit Irrigation Strategies and Soil-Management Systems in Almond Orchards for Resilient Agriculture	2024	Agronomy	https:// doi.org/10.3390/agronomy14102288	ivanf.garcia@juntadeandalucia.es	Seville	Spain	37.51105655065224	-5.9648789190497125	Almond	water stress (irrigation management) cover crop	to evaluate the effects of the application of RDI combined with CC on soil carbon storage, microbial and enzymatic activity, crop water status, and the yield of three almond cultivars	Field trial	2021 to 2023	3 seasons	Cultivar selection 100% irrigation requirements, 80% irrigation requirements Bare soil, cover crop (legume and cereal)	Y	N	Y	N/A	N/A	the cover crops in irrigated orchards improved soil functionality and provided the possibility of protecting the natural resources of water and soil in the context of climate change	N/A	Regarding the cv. Marta almonds, no effects were found in yield due to either the irrigation or the plant cover presence. This suggests the feasibility of combining the irrigation strategy (RDI) for this cultivar. Other cultivars studied were negatively affected by water stress						Y										Y
search	59	Gonzalez-Rosado 2021	González-Rosado, M., Parras-Alcántara, L., Aguilera-Huertas, J., & Lozano-García, B. (2021). Long-term evaluation of the initiative 4parts per thousand under different soil managements in Mediterranean olive groves. Science of the Total Environment, 758, 11, Article 143591. https://doi.org/10.1016/j.scitotenv.2020.143591	Long-term evaluation of the initiative 4‰ under different soil managements in Mediterranean olive groves	2021	Science of the Total Environment	https://doi.org/10.1016/j.scitotenv.2020.143591	beatriz.lozano@uco.es	Jaen	Spain	37.8486	-3.8653	Olive	Tillage management	to compare the long-term effect of management change (from conventional tillage to no tillage + herbacides) in olive groves with the long-termeffects of CTand to demonstrate ifwith this change the objectives of the 4‰ initiative could be achieved	Field trial	2004 to 2019	15 years	Conventional tillage No till + herbacides with bare soil	Y	Y	N	SOC	Neither conventional tillage nor no till + herbacides on bare soil increased soil carbon content	N/A	N/A	N/A
search	60	Guzetti 2020	Guzzetti, L., Fiorini, A., Panzeri, D., Tommasi, N., Grassi, F., Taskin, E., Misci, C., Puglisi, E., Tabaglio, V., Galimberti, A., & Labra, M. (2020). Sustainability Perspectives of <i>Vigna unguiculata</i> L. Walp. Cultivation under No Tillage and Water Stress Conditions. Plants-Basel, 9(1), 15, Article 48. https://doi.org/10.3390/plants9010048	Sustainability Perspectives of Vigna unguiculata L. Walp. Cultivation under No Tillage and Water Stress Conditions	2020	Plants	https://doi.org/10.3390/plants9010048	edoardo.puglisi@unicatt.it	Piacenza	Italy	45.005	9.70353	cowpea	Tillage management Cover crops Iriigation	to assess the impact of conservation agriculture management on the growth performance and the nutritional profile of cowpea	Field trial	2018	1 year	Cow pea was tested in an established rotation system trials of No till and Conventional tillage. The rotation was soybean, durum winter wheat, maize (three year). In the NT plots, cover crops were included in the winter off-season, incl a mix of rye, hairy vetch, crimson clover, italian rye grass and radish	N	Y	Y	SOC	soil carbon sequestration: total CO2 sequestration per year was estimated to be 0.32 Mg yr−1 soil C stock in the 0–30 cm soil layer was statistically affected by the tillage system and was 2.58 Mg ha−1 higher in NT than in CT soil (+5%). C and N concentrations in this soil layer were 59% and 27% higher under NT than under CT. No significant difference in soil C and N concentration was found in th…	Improved water saving capacity and improved soil health from increase in carbon content in NT treatments.	N/A	No significant difference in grain yield across variables. The straw biomass of cow pea was significantly more in the irrigated plots than the nonirrigated. CT non-irrigated had the lowest straw biomass CT-W and NT-W had the highest straw biomass with 6.94 and 6.63 Mg ha−1, respectively. CT-NW had the lowest straw biomass (4.22 Mg ha−1), while NT-NW did not show a significant difference compared …						Y										Y
search	61	Harrison 2024	Harrison, R. J., Nutt, B. J., Yates, R. J., Hackney, B. F., & Howieson, J. G. (2024). The de-domestication of <i>Ornithopus sativus</i> Brot. to develop cultivars with physical dormancy (hardseed). Grass and Forage Science, 79(3), 366-380. https://doi.org/10.1111/gfs.12675	The de-domestication of Ornithopus sativus Brot. to develop cultivars with physical dormancy (hardseed)	2024	Grass and Forage Science	https://doi.org/10.1111/gfs.12675	r.harrison@murdoch.edu.au	Perth	Australia	-32.21667	115.80000	Ornithopus sativus Brot. (French serradella)	Physical dormancy (cultivar selection)	to investigate the reintroduction of physical dormancy into O. sativus, viz	Field trial	Not stated	Not stated	Seeds were taken from South Africa (Emena cultivar and 97 ZAF5sat) and Australia (Cadiz cultivar)	Y	N	Y	N/A	N/A	Forage legume was de-domesticated to introduce physical dormancy, early maturation, hightened plant vigour, proficient nitrogen fixation, adaptation to acidic sandy soils, and the development of harvestable segmenting pods into new cultivars	N/A	N/A	Framed in the context of ley farming with self seeding legumes								Y
search	62	Hontoria 2018	Hontoria, C., Gómez-Paccard, C., Vázquez, E., Mariscal-Sancho, I., Ordónez-Fernández, R., Carbonell-Bojollo, R., & Espejo, R. (2018). Mid-long term effects of no tillage and Ca-amendment on degraded acid soils under contrasting weather conditions. Soil & Tillage Research, 183, 83-92. https://doi.org/10.1016/j.still.2018.06.002	Mid-long term effects of no tillage and Ca-amendment on degraded acid soils under contrasting weather conditions	2018	Soil and Tillage Research	https://doi.org/10.1016/j.still.2018.06.002	c.hontoria@upm.es (C. Hontoria)	Canamero's Rana	Spain	39.31864	-5.32583	various forage mixture	Tillage management Ca amendments	to assess: i) the evolution in themid-long term of selected indicators related to soil acidity as well as OM variables as a result of the tillage system (NT vs. TT) and Ca-amendment, and ii) the effect of treatments on the biomass production under variable Mediterranean weather conditions	Field trial	2005 to 2012	7 years	Tillage, no tillage with and without Ca-amendment	Y	N	Y	N/A	N/A	NT and the Ca-amendment increased total organic carbon by 31% and 25%. The positive effect of NT on organic matter variables increased with time, whereas the beneficial effect of the Ca-amendment was stronger in the early years of the experiment dverse weather conditions, with either excessive precipitation in autumn-winter or scarce precipitation in spring, favoured biomass production under NT. …	N/A	N/A																			Y
search	63	Hrameche 2024	Hrameche, O., Tul, S., Manolikaki, I., Digalaki, N., Kaltsa, I., Psarras, G., & Koubouris, G. (2024). Optimizing Agroecological Measures for Climate-Resilient Olive Farming in the Mediterranean. Plants-Basel, 13(6), 19, Article 900. https://doi.org/10.3390/plants13060900	Optimizing Agroecological Measures for Climate-Resilient Olive Farming in the Mediterranean	2024	Plants	https://doi.org/10.3390/ plants13060900	koubouris@elgo.gr	Nerokourou, western Crete	Greece	35.47688	24.04346	Olive	Organic fertiliser	to evaluate the potential of climate change-mitigation effects through the application of several sustainable soil practices with low negative environmental impact in field conditions on soil properties in a productive olive-grove context	Field trial	2020 to 2022	2 years	control: soil tillage with no organic matter additions, soil covered by natural vegetation, fallen leaves and branches OK. compost: olive mill by products pruning residues: added as mulch, no tillage cover crops: mixture of legumes (arvense, medicago sativa, Vicia faba, Vicia sativa, Avena sativa (incorporated into the soil) all: no insect manure, but compost, pruning and cover crops insect manur…	Y	Y	Y	SOC	The treatment with compost, pruning residue and cover crops had the highest soil organic matter (4.33%) compared to the control (1.65%) at a 0 to 10 cm depth	SWC: Highest SWC was linked to highest SOM (from compost especially). All had highest swc (4.36% in September), control had the lowest (2.88%) soil pH: n odifference EC: All and the highest, control had the lowest SOM: ALL expressed the highest value of SOM (4.73%) compared to the lowest values of PRUN (3.30%) and CONT (3.48%) at 0–10 cm, marking an increase of (43.3%) and (35.9%), respectively. …	N/A	N/A																			Y
search	64	Hunt 2013	Hunt, J. R., Browne, C., McBeath, T. M., Verburg, K., Craig, S., & Whitbread, A. M. (2013). Summer fallow weed control and residue management impacts on winter crop yield through soil water and N accumulation in a winter-dominant, low rainfall region of southern Australia. Crop & Pasture Science, 64(9), 922-934. https://doi.org/10.1071/cp13237	Summer fallow weed control and residue management impacts on winter crop yield through soil water and N accumulation in a winter-dominant, low rainfall region of southern Australia	2013	Crop and Pasture Science	http://dx.doi.org/10.1071/CP13237	James.Hunt@csiro.au	Hopetoun	Australia	-3.7738889	144.4911111	Barley, canola, whet	Crop residue Weed control	to: (1) Experimentally verify the relative effects of residue management and weed control on both soil water and nitrogen accumulation; (2) Quantify the relative importance of, and the interactions between, fallow soil water and nitrogen effects at sowing for performance of the subsequent crop	Field trial	2008 to 2011	3 seasons	(1) standing residue + no summer weeds; (2) standing residue + summer weeds; (3) slashed residue + no summer weeds; (4) bare earth + no summer weeds; (5) bare earth + summer weeds; (6) cultivation + no summer weeds	Y	N	Y	N/A	N/A	Thepresenceofresidue (2.4–5.8 t/ha) hadno effecton soil wateraccumulationanda small negative effectongrain yield on the clay soil in 2011. Controlling summer weeds (Heliotropium europaeum and volunteer crop species) increased soil water accumulation (mean 45mm) and mineral N (mean 45 kg/ha) before sowing on both soil types in 2 years of the experiment with significant amounts ofsummer fallow rain…	N/A	See adaptation																						Y
search	65	Ilker 2017	Ilker, E. (2017). PERFORMANCES OF SOYBEAN <i>Glycine max</i> (L.) Merr. ADVANCED LINES GROWN IN SECOND CROPPING UNDER MEDITERRANEAN CLIMATICAL CONDITIONS OF WESTERN TURKEY. Turkish Journal of Field Crops, 22(1), 104-107. https://doi.org/10.17557/tjfc.311003	PERFORMANCES OF SOYBEAN [Glycine max (L.) Merr.] ADVANCED LINES GROWN IN SECOND CROPPING UNDER MEDITERRANEAN CLIMATICAL CONDITIONS OF WESTERN TURKEY	2017	Turkish Journal of Field Crops	https://doi.org/10.17557/tjfc.311003	emre.ilker@ege.edu.tr	Bornova	Turkiye	38.4667	27.2167	soybean	cultivar	to determine promising soybean [Glycine max (L.) Merr.] advanced genotypes grown in second cropping under the growing conditions of Mediterranean climate in western Turkey	Field trial	2014 to 2015	2 seasons	10 high-yielding early advanced soybean lines and 4 registered soybean varieties	N	N	Y	N/A	N/A	large variations were found among the genotypes, years and genotype x year interaction. According to the results advanced breeding lines KASM03, KASM02 and KAMA were the highest yielding genotypes with early maturity	N/A	See adaptation									Y
search	66	Iovane 2022	Iovane, M., Izzo, L. G., Cirillo, A., Romano, L. E., Di Vaio, C., & Aronne, G. (2022). Flowering and pollen resilience to high temperature of apricot cultivars. Scientia Horticulturae, 304, 8, Article 111261. https://doi.org/10.1016/j.scienta.2022.111261	Flowering and pollen resilience to high temperature of apricot cultivars	2022	Scientia Horticulturae	https://doi.org/10.1016/j.scienta.2022.111261	luigigennaro.izzo@unina.it	Eboli	Italy	40.55	14.9666667	apricot	Cultivar	to investigate possible differences in flowering phenology and the effect of different temperatures on pollen functionality of 13 apricot cultivars traditionally cultivated in the Campania region (Southern Italy)	Field trial	2021	1 year	13 apricot cultivars, namely: ‘Don Aniello’, ‘Ottavianese’, ‘Ceccona’, ‘Sona Campana’, ‘Vitillo’, ‘Zi Francesco’, ‘Zi Luisa’, ‘Portici’, ‘Pellecchiella’, ‘Boccuccia Liscia’, ‘Portici II’, ‘Boccuccia Spinosa’, ‘Scial`o’	Y	N	Y	N/A	N/A	our findings highlighted that pollen germination is extremely sensitive to temperature with significant variations among apricot genotypes. Results confirmed that reproductive traits such as pollen germinability represent an important parameter to consider for monitoring fruit production, in the processes of cultivar selection for new orchard plantations and in breeding projects. Moreover, tradit…	N/A	N/A									Y
search	67	Jaoudi 2019	Jaouadi, J., Aichi, H., Ben Hassine, H., Hatira, A., & Balesdent, J. (2019). Carbon Turnover in a Sorghum-cultivated Semi-arid Mediterranean Soil Profile. Communications in Soil Science and Plant Analysis, 50(19), 2457-2468. https://doi.org/10.1080/00103624.2019.1667372	Carbon Turnover in a Sorghum-cultivated Semi-arid Mediterranean Soil Profile	2019	Communications in Soil Science and Plant Analysis	https://doi.org/10.1080/00103624.2019.1667372	hamoudaaichi@gmail.com	Zaghouan Governorate	Tunisia	36.7333	10.2778	Sorghum	organic fertiliser management	to quantify carbon dynamics in a Tunisian Calcaric Cambisol profile, using the natural 13C labeling offered by the continuous C4 crop forage sorghum	Field trial	2003 to 2015?	12 years	continious crop of forage sorghum	Y	Y	N	SOC	sorghum forage production in combination with manure application can maintain the high SOC stocks that are characterizing these dry clayey soils	N/A	N/A	N/A																			Y
search	68	Kargar 2024	Kargar, M. H., Sayfzadeh, S., Jabari, H., Zakerin, H. R., & Golzardi, F. (2024). Forage yield, seed, and forage qualitative traits evaluation by determining the optimal forage harvesting stage in dual-purpose cultivation in safflower varieties (<i>Carthamus tinctorius</i> L.). Open Agriculture, 9(1), 15, Article 20220277. https://doi.org/10.1515/opag-2022-0277	Forage yield, seed, and forage qualitative traits evaluation by determining the optimal forage harvesting stage in dual-purpose cultivation in safflower varieties (Carthamus tinctorius L.)	2024	Open Agriculture	https://doi.org/10.1515/opag-2022-0277	saeedsayfzadeh@yahoo.com	Karaj	Iran	35.7886	51.2119	Safflower	Cultivar	to evaluate seed yield potential and safflower varieties forage by determining the optimal forage harvesting stage in a dual-purpose cultivation system	Field trial	2017 to 2019	2 years	9 varieties of Parnian, Goldasht, and Golmehr varieties	N	N	Y	N/A	N/A	Golmehr variety (11,266 kg/ha dry forage yield and 520 kg/ha seed yield) is for dual-purpose cultivation, and the Parnian variety (2,226 kg/ha seed yield) is suitable for only seed production for the semiarid region of Karaj in Iran and similar climates	N/A	See adaptation									Y
search	69	Kerbouai 2022	Kerbouai, I., M'Hamed, H. C., Jenfaoui, H., Riahi, J., Mokrani, K., Jribi, S., Arfaoui, S., Sassi, K., & Ben Ismail, H. (2022). Long-term effect of conservation agriculture on the composition and nutritional value of durum wheat grains grown over 2 years in a Mediterranean environment. Journal of the Science of Food and Agriculture, 102(15), 7379-7386. https://doi.org/10.1002/jsfa.12105	Long-term effect of conservation agriculture on the composition and nutritional value of durum wheat grains grown over 2 years in a Mediterranean environment	2022	Journal of the Science of Food and Agriculture	https://doi.org/10.1002/jsfa.12105	imene.kerbouai@gmail.com	Jendouba	Tunisia	36.5477472	9.0113139	durum wheat	cultivar tillage management soil cover (residue management)	to evaluate the effect of two soil management systems – conservation agriculture (CA) and conventional tillage (CT) – on the grain composition and nutritional value of two durum wheat varieties (Karim and Monastir)	Field trial	2018 to 2020	2 seasons	Conservation agriculture, conservation tillage Karim, Monastir varieties	Y	N	Y	N/A	N/A	he long-term adoption of CA can mitigate the effects of climate change on durum wheat by improving some grain composition and nutritional value	N/A	N/A									Y													Y
search	70	Kizildeniz 2018	Kizildeniz, T., Irigoyen, J. J., Pascual, I., & Morales, F. (2018). - Simulating the impact of climate change (elevated CO2 and temperature, and water deficit) on the growth of red and white Tempranillo grapevine in three consecutive growing seasons (2013–2015). - 202, - 230. - https://www.scopus.com/inward/record.uri?eid=2-s2.0-85042485181&doi=10.1016%2fj.agwat.2018.02.006&partnerID=40&md5=4980d…	Simulating the impact of climate change (elevated CO2 and temperature, and water deficit) on the growth of red and white Tempranillo grapevine in three consecutive growing seasons (2013–2015)	2018	Agriculture Water Management	https://doi.org/10.1016/j.agwat.2018.02.006	fmorales@eead.csic.es	Navarra	Spain	42.80000	-1.66667	Grape	(cultivar selection ) high CO2 high temperature water scarcity	to analyze the influence of the three main climate change-related factors (elevated CO2, high temperature and water scarcity), acting both individually and/or interacting, on plant vegetative and reproductive (yield) growth in fruit-bearing cuttings of two grapevine cultivars (red and white Tempranillo)	Field trial	2013 to 2015	3 years	two CO2 levels (ambient ca. 400 ppm, and elevated ca. 700 ppm), two temperature regimes (ambient and ambient +4 °C) and two water availability conditions (full irrigation and cyclic drought)	Y	N	Y	N/A	N/A	vegetative growth (total vegetative mass) was significantly reduced by drought (consistent the three years) and was associated to a low substrate water status and low leaf stomatal conductance. Elevated CO2 stimulated total vegetative mass, whereas leaf area was not affected. When plants were grown under elevated CO2, the largest increases were observed in leaf (white) and root (red) growth. In t…	N/A	See adaptation									Y
search	71	Laranjeira 2022	Laranjeira, S., Reis, S., Torcato, C., Raimundo, F., Ferreira, L., Carnide, V., Fernandes-Silva, A., & Marques, G. (2022). Use of Plant-Growth Promoting Rhizobacteria and Mycorrhizal Fungi Consortium as a Strategy to Improve Chickpea (<i>Cicer arietinum</i> L.) Productivity under Different Irrigation Regimes. Agronomy-Basel, 12(6), 9, Article 1383. https://doi.org/10.3390/agronomy12061383	Use of Plant-Growth Promoting Rhizobacteria and Mycorrhizal Fungi Consortium as a Strategy to Improve Chickpea (Cicer arietinum L.) Productivity under Different Irrigation Regimes	2022	Agronomy	https://doi.org/10.3390/ agronomy12061383	gmarques@utad.pt	Vila Real	Portugal	41.2858	-7.74128	Chickpea	microbial innoculation (water stress) (symbiotic amendment)	to evaluate the effects of inoculation with a consortium of PGPR (Pseudomonas sp. DSM 33393, Burkholderia sp. DSM 33394 and Mesorhizobium sp. DSM 33395) and multiple AMF (Rhizophagus irregularis, Funneliformis geosporum and Claroideoglomus claroideum) on plant growth, grain yield and crude protein content of chickpeas under different irrigation regimes	Field trial	2018 to 2019	1 season	the following irrigation regimes: I1-no water stress, I2-moderate water stress, I3strong water-stress, I4-no water stress in critical growth stages of plant cycle development and I5-severe water stress	Y	N	Y	N/A	N/A	Plants irrigated only during the critical growth stages of flowering and pod filling showed higher grain yields compared to plants from other water deficit irrigation treatments. Additionally, chickpeas co-inoculated with PGPR and AMF, and irrigated only during critical growth stages, presented higher grain yield than non-inoculated plants without water stress	N/A	See adaptation
search	72	Lazaridi 2020	Lazaridi, E., Papadopoulos, G. K., & Bebeli, P. J. (2020). Andean Lupin Phenology and Agronomic Performance under Different Planting Dates in a Mediterranean Climate. Agronomy-Basel, 10(12), 20, Article 2020. https://doi.org/10.3390/agronomy10122020	Andean Lupin Phenology and Agronomic Performance under Different Planting Dates in a Mediterranean Climate	2020	Agronomy	https://doi.org/10.3390/agronomy10122020	bebeli@aua.gr	Athens	Greece	37.98431	23.70278	Lupin	Cultivar selection	to evaluate six L. mutabilis accessions, to assess the effect of planting date on their phenology and agronomical performance and to investigate what is the suitable growing season for L. mutabilis in the studied location	Field trial	2017 to 2019	2 seasons	2 commercial cultivars from the Mediterranean and 6 cultivars of the Andean lupin	N	N	Y	N/A	N/A	Andean lupin has higher protein and oil. Planting during October to November is recommended, higher tempreautres shorten the growth cycle and reduce yield.	N/A	See adaptation									Y
search	73	Lazcano 2022	Lazcano, C., Gonzalez-Maldonado, N., Yao, E. H., Wong, C. T. F., Falcone, M., Peterson, J. D., Casassa, L. F., Malama, B., & Decock, C. (2022). Assessing the Short-Term Effects of No-Till on Crop Yield, Greenhouse Gas Emissions, and Soil C and N Pools in a Cover-Cropped, Biodynamic Mediterranean Vineyard. Australian Journal of Grape and Wine Research, 2022, 12, Article 8100818. https://doi.org/10…	Assessing the Short-Term Effects of No-Till on Crop Yield, Greenhouse Gas Emissions, and Soil C and N Pools in a Cover-Cropped, Biodynamic Mediterranean Vineyard	2022	Australian Journal of Grape and Wine Research	https://doi.org/10.1155/2022/8100818	clazcano@ucdavis.edu	California	USA	35.6368815316971	-120.6474623600155	Grape	Tillage management	to evaluate the short-term efects of transitioning to no-till on the yield and quality of Syrah grapes, soil C and N pools, soil biophysical properties, and greenhouse gas emissions in a biodynamically-managed vineyard	Field trial	2018 to 2021	3 years	alternating till and no till blocks	Y	Y	N	SOC, N2O, CO2	No change in N2O, no difference in carbon sequestered, no difference in CO2 emissions no differences compared to till	N/A	N/A	No change in yield or quality	This study assessed the short-term effects of transitioning to no-till. No till did not exist before the study.
search	74	Lee 2009	Lee, J., Hopmans, J. W., van Kessel, C., King, A. P., Evatt, K. J., Louie, D., Rolston, D. E., & Six, J. (2009). Tillage and seasonal emissions of CO<sub>2</sub>, N<sub>2</sub>O and NO across a seed bed and at the field scale in a Mediterranean climate. Agriculture Ecosystems & Environment, 129(4), 378-390. https://doi.org/10.1016/j.agee.2008.10.012	Tillage and seasonal emissions of CO2, N2O and NO across a seed bed and at the field scale in a Mediterranean climate	2009	Agriculture, Ecosystems and Environment	https://doi.org/10.1016/S1002-0160(21)60032-210.1016/j.agee.2008.10.012	ecolee@ucdavis.edu	California	USA	38.6000	-121.8333	Maize, Sunflower, Chickpea	Tillage management	to (i) quantify CO2, N2O, and NO emissions from an irrigated field under standard and minimum tillage, (ii) determine the temporal and spatial variations in CO2, N2O, and NO emissions across a seed bed, and (iii) evaluate, at the field scale, the relationships between CO2 or N2O emissions and their underlying factors: soil water and temperature	Field trial	2003 to 2006	3 years	The treatments include conventional tillage and minimum tillage	Y	Y	N	N2O, CO2	Seasonal and annual CO2 emissions were likely a function of crop growth and type, respectively, whereas N2O emissions tend to correspond to the timing and amount of N fertilization and irrigation events. No gross effect of tillage or position on CO2 and N2O emissions were found.	N/A	N/A	N/A
search	75	Li 2019	Li, M., Peterson, C. A., Tautges, N. E., Scow, K. M., & Gaudin, A. C. M. (2019). Yields and resilience outcomes of organic, cover crop, and conventional practices in a Mediterranean climate. Scientific Reports, 9, 11, Article 12283. https://doi.org/10.1038/s41598-019-48747-4	Yields and resilience outcomes of organic, cover crop, and conventional practices in a Mediterranean climate	2019	Scientific Reports	https://doi.org/10.1038/s41598-019-48747-4	agaudin@ucdavis.edu	Winters	USA	38.00900	-121.01450	Maize and tomato	chemical fertiliser management organic fertiliser management cover crops	to assesss for long-term yield resilience in irrigated maize-tomato long-term rotations under three different management systems: a conventional management system, and two ecological intensification strategies	Field trial	1994 to 2017	23 years	three management systems applied to the maize/tomato rotation: (1) conventional maize-tomato system with synthetic inputs (“CONV”), (2) maize-tomato system with synthetic inputs and winter cover crops (“CONV + WCC”), and (3) organic maize-tomato system with annual compost applications, winter cover crops, and no synthetic inputs (“ORG”). Each system has six replicates: three replicates for maize …	Y	N	Y	N/A	N/A	Organic management maintained tomato yields comparable to those under conventional management, while increasing yield stability and resistance. However, organic and cover cropped system resulted in 36.1% and 35.8% lower maize yields and reduced yield stability and resistance than the conventional system.	N/A	See adaptation					Y	Y													Y
search	76	Lopez-Vicente 2020	López-Vicente, M., Calvo-Seas, E., Alvarez, S., & Cerdà, A. (2020). Effectiveness of Cover Crops to Reduce Loss of Soil Organic Matter in a Rainfed Vineyard. Land, 9(7), 16, Article 230. https://doi.org/10.3390/land9070230	Effectiveness of Cover Crops to Reduce Loss of Soil Organic Matter in a Rainfed Vineyard	2020	Land	https://doi.org/10.3390/land9070230	mlopezvicente@gmail.com	Huesca	Spain	42.03444	0.07028	Grape	cover crop	to assess the effectiveness of two years of cover crop management to reduce the organic matter loss is evaluated in a rainfed vineyard in a rolling landscape considering surface coverage, slope gradient and total drainage area	Field trial	2017 to 2018	15 months	a rainfed vineyard was selected in a rolling landscape under Mediterranean conditions and managed with a mixed cover crop of common sainfoin (forage legume) and spontaneous vegetation	Y	N	Y	N/A	N/A	the average annual rate of OM loss was 3.6 times higher in the plot with lower vegetation cover than in the plot with CCs (1.29 vs. 0.35 kgOM ha−1 yr−1)	N/A	See adaptation						Y
search	77	Lopez-Vicente 2021	López-Vicente, M., Gómez, J. A., Guzmán, G., Calero, J., & García-Ruiz, R. (2021). The role of cover crops in the loss of protected and non-protected soil organic carbon fractions due to water erosion in a Mediterranean olive grove. Soil & Tillage Research, 213, 14, Article 105119. https://doi.org/10.1016/j.still.2021.105119	The role of cover crops in the loss of protected and non-protected soil organic carbon fractions due to water erosion in a Mediterranean olive grove	2021	Soil and Tillage Research	https://doi.org/10.1016/j.still.2021.105119	rgarcia@ujaen.es	Benacazon village	Spain	37.3433	-6.2292	Olive	Cover crop	to assess the impact of temporary covercrop on the sediment/soil C enrichment ratio of different SOC pools, including unporteced and physically, chemically and biochemically protected SOC	Field trial	2010 to 2011	1 year	I) Conventional tillage (chisel plough passes and vegetation control), II) a mixture of plant species as CC and III) a uniform CC with one species	Y	Y	N	SOC	Temporary cover crops are key to increase total SOC and fractions of different protection levels in woody orchards, such as olive groves. The higher total (+46 %), unprotected (+88.4 %) and protected (+28.5 %) SOC contents in the top –5 cm– soil layer under six year of CC highlights the effectiveness of this agricultural management practice to sequester C in the topsoil of permanent crops	N/A	N/A	N/A						Y
search	78	Lumor 2023	Lumor, E., Zurgil, U., & Gelfand, I. (2023). - Soil nitric and nitrous oxide emissions across a nitrogen fertilization gradient in root crops: A case study of carrot (Daucus carota) production in Mediterranean climate. - 18(- 10 OCTOBER). - https://www.scopus.com/inward/record.uri?eid=2-s2.0-85175277003&doi=10.1371%2fjournal.pone.0287436&partnerID=40&md5=9821237781b24daf1a04f638e93a1294	Soil nitric and nitrous oxide emissions across a nitrogen fertilization gradient in root crops: A case study of carrot (Daucus carota) production in Mediterranean climate	2023	PLoS ONE	https://doi.org/10.1371/journal. pone.0287436	igelfand@bgu.ac.il	Kibbutz Urim	Israel	35.78861	51.21194	Carrot	Chemical fertiliser management	to assess the response of soil N2O and NO emissions to fertilisation along a gradient in a carrot farm	Field trial	2019 and 2020	1 season	five fertilization levels including non-fertilized control, lower than standard application of100 kg N ha-1, conservative standard application of200 kg N ha-1 and two high levels of300 and 400 kg N ha-1	Y	Y	N	N2O	Soil N2O and NO emissions were similar at all fertilization levels and did not differ significantly from those in the unfertilized control.	N/A	N/A	Carrot yield increased with increasing fertilization from 0 to 100 kg N ha−1 and exhibited no further response thereafter					Y
search	79	MacAlister 2020	MacAlister, D., Muasya, A. M., Crespo, O., Ogola, J. B. O., Maseko, S. T., Valentine, A. J., Ottosen, C. O., Rosenqvist, E., & Chimphango, S. B. M. (2020). Effect of temperature on plant growth and stress tolerant traits in rooibos in the Western Cape, South Africa. Scientia Horticulturae, 263, 14, Article 109137. https://doi.org/10.1016/j.scienta.2019.109137	Effect of temperature on plant growth and stress tolerant traits in rooibos in the Western Cape, South Africa	2020	Scientia Horticulturae	https://doi.org/10.1016/j.scienta.2019.109137	samson.chimphango@uct.ac.za	Aurora Citrusdal Clanwilliam Uitsig	South Africa	,-32.6852 -32.638367 -32.161417 -31.9208	18.438050 18.958433 18.777350 19.071833	Rooibos	Heat stress (temperature) (cultivar selection)	to assess the effects of temperature on the growth and stress tolerant traits, such as changes in gas exchange, and concentration of carbohydrates, phenolics and pigments	Field trial	2017 and 2018	2 seasons	Four sites, representing the rooibos farming area, were chosen in the Cederberg, Western Cape, South Africa, along a temperature gradient from coolest to warmest	Y	N	Y	N/A	N/A	A. linearis grown at Aurora and Citrusdal, which had the lowest maximum temperatures and fewer days where temperatures went over 35 °C throughout the year, had greater aboveground biomass than plants grown at the warmer and lower rainfall sites	N/A	See adaptation									Y
search	80	Madejon 2025	Madejón, P., Fernández-Boy, E., Madejón, E., Morales-Salmerón, L., & Domínguez, M. T. (2025). Managing climate change impacts on crops: The influence of soil tillage on a triticale crop under water stress conditions. Annals of Applied Biology, 186(2), 143-156. https://doi.org/10.1111/aab.12947	Managing climate change impacts on crops: The influence of soil tillage on a triticale crop under water stress conditions	2024	Annals of Applied Biology	https://doi.org/10.1111/aab.12947	pmadejon@irnase.csic.es	Seville	Spain	37.35812669190551	5.986530862877596	Triticale	Tillage management	to evaluate the resistance to drought (through a rainfall exclusion experiment) of triticale (Triticale hexaploide L.) crops managed with different tillage systems: traditional tillage (TT), reduced tillage (RT) and no tillage (NT).	Field trial	2020	1 season	Traditional tillage Reduced tillage No tillage With and without rain exclusion	Y	N	Y	N/A	N/A	No till had the highest water soil water storage (by 16%). It had higher grain yield stability under drought and better mycorrhizal symbiosis. Traditional tillage where rain was excluded had a reduced yield by 31%	N/A	N/A
search	81	Maienza 2017	Maienza, A., Baronti, S., Cincinelli, A., Martellini, T., Grisolia, A., Miglietta, F., Renella, G., Stazi, S. R., Vaccari, F. P., & Genesio, L. (2017). Biochar improves the fertility of a Mediterranean vineyard without toxic impact on the microbial community. Agronomy for Sustainable Development, 37(5), 9, Article 47. https://doi.org/10.1007/s13593-017-0458-2	Biochar improves the fertility of a Mediterranean vineyard without toxic impact on the microbial community	2017	Agronomy for Sustainable Development	https://doi.org/10.1007/s13593-017-0458-2	a.maienza@ibimet.cnr.it	Montepulciano	Italy	43.17083	11.96194	Grape	Biochar	to study the long-term effects of biochar treatment on soil fertility and ecological toxicity have seldom been studied at a real farm scale	Field trial	2009 to 2014	5 years	Control with no biochar, a single biochar application, repeated biochar application	Y	N	Y	N/A	N/A	a longer term biochar application in a vineyard has no impact on soil microorganisms and does not retain toxic compounds (PAH and heavy metals)	N/A	N/A	Relevant? This looks at unintended consequences…		Y
search	82	Mancinelli 2023	Mancinelli, R., Allam, M., Petroselli, V., Atait, M., Jasarevic, M., Catalani, A., Marinari, S., Radicetti, E., Jamal, A., Abideen, Z., & Chilosi, G. (2023). Durum Wheat Production as Affected by Soil Tillage and Fertilization Management in a Mediterranean Environment. Agriculture-Basel, 13(2), 15, Article 433. https://doi.org/10.3390/agriculture13020433	Durum Wheat Production as Affected by Soil Tillage and Fertilization Management in a Mediterranean Environment	2023	Agriculture	https://doi.org/10.3390/ agriculture13020433	emanuele.radicetti@unife.it	Viterbo	Italy	45.4166667	12.1	Durum wheat	Tillage management chemical fertiliser organic fertiliser	to assess the effects of different soil tillage practices (plough; subsoil; spading) and fertilization managements (mineral vs. compost) on plant growth dynamics and the final productivity of durum wheat growing	Field trial	2019 to 2022	3 seasons	Conventional tillage, subsoil tillage, spading machine Mineral fertiliesr, compost	N	N	Y	N/A	N/A	the importance of conservation tillage practices such as subsoil and using spading machine, combined with rotation cropping systems to enhance crop productivity and the total carbon in the soils, compared with the traditional ploughing tillage. Grain yield reduction was observed when depending on compost as an organic fertilizer compared with mineral fertilizers. However, higher TKW could be achi…	N/A	See adaptation					Y														Y
search	83	Marquez-Garcia 2013	Marquez-Garcia, F., Gonzalez-Sanchez, E. J., Castro-Garcia, S., & Ordoñez-Fernandez, R. (2013). Improvement of soil carbon sink by cover crops in olive orchards under semiarid conditions. Influence of the type of soil and weed. Spanish Journal of Agricultural Research, 11(2), 335-346. https://doi.org/10.5424/sjar/2013112-3558	Improvement of soil carbon sink by cover crops in olive orchards under semiarid conditions. Influence of the type of soil and weed	2013	Spanish Journal of Agricultural Research	http://dx.doi.org/10.5424/sjar/2013112-3558	fmarquez@agriculturadeconservacion.org	Cordoba Jaen Seville Huelva	Spain	37.76922 37.88818	-3.79028 -4.77944	Olive	Cover crops	to quantify the efficiency of cover crops (CC) as a method for improving soil capacity as a C sink	Field trial	2003 to 2007	4 seasons	Conventional tillage, no tillage spontaneous cover crop, sown cover crop	Y	Y	Y	SOC	The cover crop of grass had the best results in increasing the C sink. Cover crop increased soil C sink by 12.3 Mg ha–1 year–1 of carbon dioxide (CO2 ) equivalent	Covercrops reduced erosion by 80.5%, and also organic carbon transport by 67.7%. with respect to conventional tillage	N/A	N/A						Y
search	84	Martinez-Mena 2021	Martínez-Mena, M., Boix-Fayos, C., Carrillo-López, E., Díaz-Pereira, E., Zornoza, R., Sánchez-Navarro, V., Acosta, J. A., Martínez-Martínez, S., & Almagro, M. (2021). - Short-term impact of crop diversification on soil carbon fluxes and balance in rainfed and irrigated woody cropping systems under semiarid Mediterranean conditions. - 467(- 1-2), - 514. - https://www.scopus.com/inward/record.uri?e…	Short‑term impact of crop diversification on soil carbon fluxes and balance in rainfed and irrigated woody cropping systems under semiarid Mediterranean conditions	2022	Plant Soil	https://doi.org/10.1007/s11104-021-05101-w	mmena@cebas.csic.es	Murcia	Spain	37.9586	-0.9380	Almond Mandarin	Irrigation Crop diversification	to assess the short-term effect of crop diversification on the soil carbon balance of a rainfed and an irrigated woody crop system	Field trial	2020	Sincle analysis	Almond orchard: a. intercropping with caper at a spacing of 3.5x3.5m b. thyme at a spacing of 1mx0.5m c. monoculture aof almond Mandarin orchard: d. intercropping with barley and vetch followed by fava bean e. monccultrue of mandarin	Y	Y	N	SOC	Crop diversification did not affect SOC stocks. Crop diversification using annual species. Crop diversification with perennials in the low-input rainfed woody crop system significantly improved the annual soil C balance in the short-term in the intensively managed woody crop system did not improve the annual soil C balance but, a significant increase in plant carbon inputs and a reduction in the …	N/A	N/A	N/A															Y	Y
search	85	Martin-Lammerding 2013	Martín-Lammerding, D., Tenorio, J. L., Albarrán, M. M., Zambrana, E., & Walter, I. (2013). Influence of tillage practices on soil biologically active organic matter content over a growing season under semiarid Mediterranean climate. Spanish Journal of Agricultural Research, 11(1), 232-243. https://doi.org/10.5424/sjar/2013111-3455	Influence of tillage practices on soil biologically active organic matter content over a growing season under semiarid Mediterranean climate	2013	Spanish Journal of Agricultural Research	http://dx.doi.org/10.5424/sjar/2013111-3455	lammerding@inia.es	Madrid	Spain	40.53333	-3.33333	Wheat	Tillage management crop rotation	to assess the effects of the tillage practices and cropping backgrounds used for 12 years on the SOC, POM, PMN and MB contents of a semiarid Mediterranean soil over a single growing season (2006-2007)	Field trial	2006 to 2007	1 season	Conventional tillage, minimum tillage, no-tillage continuous wheat, fallow-winter wheat-pea-barley	N	Y	Y	SOC	Tillage practice had no effect on SOC. The fallow preceding the crop probably was the cause of less SOC compared to continuous wheat	The NT plots accumulated 66% C-POM, 60% N-POM, 39% PMN and 84% C-MB more than the CT plots. After more than 12 years, the benefits of conservation practices were found in the considered soil properties, mainly under no tillage	N/A	Wheat yields were signifcantly lower in minimal till and no till compared to conventional till The crop rotation did not have an impact							Y
search	86	Matias 2024	Matias, J., Cruz, V., Rodríguez, M. J., Calvo, P., Maestro-Gaitán, I., & Reguera, M. (2024). Evaluating Yield, Nutritional Quality, and Environmental Impact of Quinoa Straws across Mediterranean Water Environments. Plants-Basel, 13(6), 18, Article 751. https://doi.org/10.3390/plants13060751	Evaluating Yield, Nutritional Quality, and Environmental Impact of Quinoa Straws across Mediterranean Water Environments	2024	Plants	https://doi.org/10.3390/ plants13060751	javier.matias@juntaex.es (J.M.); maria.reguera@uam.es (M.R.)	Badajoz Maguilla	Spain	38.85278 38.39139	-6.65278 -5.70778	Quinoa	Irrigation Cultivar	to understand the impact of water environmental conditions on straw yield and composition of different quinoa varieties	Field trial	2019 to 2020	1 season	hree different water environmental conditions (irrigated (I), fresh rainfed (FR), and hard rainfed (HR) three quinoa varieties	Y	N	Y	N/A	N/A	most of the parameters evaluated were susceptible to change mainly with the water environment but also with the genotype (or their interaction), including the yield, crude protein, relative feed value (RFV), and mineral content, which generally decreased under water-limiting conditions	N/A	See Adaptation									Y							Y
search	87	Matthews 2025	Matthews, L., Strauss, J. A., Reinsch, T., Smit, H. P. J., Taube, F., Kluss, C., & Swanepoel, P. A. (2025). Legumes and livestock in no-till crop rotations: Effects on nitrous oxide emissions, carbon sequestration, yield, and wheat protein content. Agricultural Systems, 224, 12, Article 104218. https://doi.org/10.1016/j.agsy.2024.104218	Legumes and livestock in no-till crop rotations: Effects on nitrous oxide emissions, carbon sequestration, yield, and wheat protein content	2025	Agricultural Systems	https://doi.org/10.1016/j.agsy.2024.104218	Pieterswanepoel@sun.ac.za	Western Cape	South Africa	−33.27665	18.70463	Wheat and canola	Crop rotation	to directly quantify N2O and CH4 fluxes and longterm soil C sequestration to ascertain both the GHG status and to compare different crop rotation systems	Field trial	2021 and 2022	1 year	crop rotations include: Wheat – wheat – wheat – canola (WWWC); Wheat – canola – wheat – cover crop mixture (WCWL); and Wheat – medic pasture – canola – medic pasture (WMCM)	Y	Y	N	SOC, N2O, CH4	All treatments had increasing SOC, but no difference found between treatments No difference in cumulative difference of N2O emissions. A difference in flux was found after rainfall event on a rotation system with legumes. Methane was negligible and not different across treatments	N/A	N/A	Wheat, medic, canola, medic rotation produced highest yield over 2000 to 2021 period							Y
search	88	Mauromicale 2005	Mauromicale, G., Marchese, M., Restuccia, A., Sapienza, O., Restuccia, G., & Longo, A. M. G. (2005). Root nodulation and nitrogen accumulation and partitioning in legume crops as affected by soil solarization. Plant and Soil, 271(1-2), 275-284. https://doi.org/10.1007/s11104-004-2772-0	Root nodulation and nitrogen accumulation and partitioning in legume crops as affected by soil solarization	2005	Plant and Soil	https://doi.org/10.1007/s11104-004-2772-0	g.mauromicale@unict.it	Siracusa	Italy	37.05	15.30	Faba bean chickpea	Solarized soil sowing date	to evaluate the effects of solarization: (1) on natural root nodulation, nitrogen accumulation and partitioning by plants; (2) and on plant growth and crop yield. In addition, the influence of sowing date and legume genotype were assessed	Field trial	1999 to 2001	2 seasons	First season: solarized and non-solarized two sowing dates two genotypes 2nd Season: solarized, non-solarized three genotypes	N	N	Y	N/A	N/A	Solarization improved faba bean and chickpea plant growth and consequently grain yield, which was 3–4 times above the average official yield for the south of Italy	N/A	See adaptation
search	89	Minikaev 2021	Minikaev, D., Zurgel, U., Tripler, E., & Gelfand, I. (2021). Effect of increasing nitrogen fertilization on soil nitrous oxide emissions and nitrate leaching in a young date palm (<i>Phoenix dactylifera</i> L., cv. Medjool) orchard. Agriculture Ecosystems & Environment, 319, 11, Article 107569. https://doi.org/10.1016/j.agee.2021.107569	Effect of increasing nitrogen fertilization on soil nitrous oxide emissions and nitrate leaching in a young date palm (Phoenix dactylifera L., cv. Medjool) orchard	2021	Agriculture, Ecosystems and Environment	https://doi.org/10.1016/j.agee.2021.107569	igelfand@bgu.ac.il	Arava Rift Valley	Israel	30.7783	35.2433	Date palm	chemical fertiliser management	to assess how increasing fertilization rates, between 0 and 2.55 kg N tree−1 yr−1, would affect soil N2O emissions and NO3 - leaching in a date palm plantation	Field trial	2019	1 year	0%, 50%, 100%, and 150% of the average N concentration in fertigation water 40 mg N L−1, applied by farmers to date palm plantations in the area	Y	Y	N	N2O	Increasing fertilization caused emissions to increase up to ~6-fold compared to low or no fertilisation. The highest fertilization rate (F2.55) treatment, nonetheless, displayed the highest fluxes across the entire growth season	N/A	N/A	N/A					Y
search	90	Moreira 2023	Moreira, R.; Nunes, C.; P. Pais, I.; Nobre Semedo, J.; Moreira, J.; Sofia Bagulho, A.; Pereira, G.; Manuela Veloso, M.; Scotti-Campos, P. Are Portuguese Cowpea Genotypes Adapted to Drought? Phenological Development and Grain Quality Evaluation. Biology 2023, 12, 507.	Are Portuguese Cowpea Genotypes Adapted to Drought? Phenological Development and Grain Quality Evaluation	2023	Biology	https://doi.org/10.3390/ biology12040507	catia.soares@iniav.pt	Not stated	Portugal	not stated	not stated	Cowpea (Vigna unguiculata)	Selective breeding: resliience to terminal drought (Selection of varieities for genetic traits)	to characterize relevant cowpea Portuguese varieties, in terms of their resistance to water stress and its effect on nutritional characteristics, to preserve existing genetic resources and highlight their potential to develop improved varieties more resilient to climate change	pot trial	Not stated	1 season	5 varieties tested under controlled environment. Water deficit was induced in pre-flowering, 5 weeks after sowing by withholding irrigation in half of the plants	Y	N	Y	N/A	N/A	Under drought conditions, the landraces L1 and L2 showed early maturation as a strategy to avoid water deficit. Grain quality protein, weight, sugars did not vary significantly The performance and maintenance of the evaluated characteristics reflect the adaptation acquired in the past by exposure to the Mediterranean climate, highlighting the potential agronomic and genetic value, still little ex…	N/A	The parameters of grain quality, the weight of 100 grains, color, protein, and soluble sugars did not vary significantly, except for sugars of the raffinose family that is associated with the adaptive mechanisms of plants to drought.									Y
search	91	Moreno-Jimenez 2016	Moreno-Jiménez, E., Fernández, J. M., Puschenreiter, M., Williams, P. N., & Plaza, C. (2016). Availability and transfer to grain of As, Cd, Cu, Ni, Pb and Zn in a barley agri-system: Impact of biochar, organic and mineral fertilizers. Agriculture Ecosystems & Environment, 219, 171-178. https://doi.org/10.1016/j.agee.2015.12.001	Availability and transfer to grain of As, Cd, Cu, Ni, Pb and Zn in a barley agri-system: Impact of biochar, organic and mineral fertilizers	2016	Agriculture, Ecosystems and Environment	http://dx.doi.org/10.1016/j.agee.2015.12.001	eduardo.moreno@uam.es	Arganda del Rey	Spain	40.3166667	-3.4833333	Barley	organic fertiliser management chemical fertiliser management biochar	to assess the interactions between biochar, fertiliser practices and trace element accumulation in barley grain	Field trial	2012	1 season	two levels of biochar, 0 and 20 t per ha, no fertilisation, mineral fertilisation, fertilisation with municipal solid waste compost, and fertilisation with sewage sludge.	Y	N	Y	N/A	N/A	No treatment was able to significantly increase Zn, Cu or Ni concentration in barley grain. Biochar helped to reduce Cd and Pb in grain, whereas As concentration slightly increased. Overall biochar amendments demonstrated a potential to decrease Cd. mineral fertilisation and sewage sludge increased grain Cd and Pb. In the soil, biochar helped to stabilise Pb and Cd, while marginally increasing As…	N/A	N/A			Y		Y														Y
search	92	Munoz 2007	Muñoz, A., López-Piñeiro, A., & Ramírez, M. (2007). Soil quality attributes of conservation management regimes in a semi-arid region of south western Spain. Soil & Tillage Research, 95(1-2), 255-265. https://doi.org/10.1016/j.still.2007.01.009	Soil quality attributes of conservation management regimes in a semi-arid region of south western Spain	2007	Soil & Tillage Research	https://doi.org/10.1016/j.still.2007.01.009	mramirez@unex.es (M. Ramı´rez)	Extremadura	Spain	39.10000	-5.66667	Maize	tillage management cover crop	to characterize changes in soil properties (soil water content, soil penetration resistance, pH, cation exchange capacity, conductivity, nitrogen, C/N ratio, and organic C) under conservation management, and determine the time needed to significantly improve soil quality and thus to halt and reverse the degradation of agricultural soil	Field trial	2002 to 2004	3 years	conventional tillage (CT), and two no-till management systems: direct seeding without a cover crop (DS) and direct seeding with a lopsided oat (Avena strigosa) cover crop (DSC)	N	Y	Y	SOC	Under long term direct seeding with a cover crop, soil organic C was about two times greater than under direct seeding and short term direct seeding with a cover crop.	Direct seeding increased the microbial community of surface soil, and reduced the potential impact of intensive agriculture on the maize rhizosphere ecosystem by increasing organic C, soil water content, total N, and aggregate stability, and decreasing penetration resistance near the surface. The differences between conventional tillage and conservation management regimes became statistically sig…	N/A	N/A	Not directly linked to yield, it is assumed soil health are an indicator.					Y
search	93	Negri 2024	Negri, L., Bosi, S., Fakaros, A., Ventura, F., Magagnoli, S., Masetti, A., Lami, F., Oliveti, G., Poggi, G. M., Bertinazzi, L., & Dinelli, G. (2024). Millets and sorghum as promising alternatives to maize for enhancing climate change adaptation strategies in the Mediterranean Basin. Field Crops Research, 318, 15, Article 109563. https://doi.org/10.1016/j.fcr.2024.109563	Millets and sorghum as promising alternatives to maize for enhancing climate change adaptation strategies in the Mediterranean Basin	2024	Field Crops Research	https://doi.org/10.1016/j.fcr.2024.109563	sara.bosi@unibo.it	Ravenna	Italy	44.26653	12.12958	Maize, Sorghum, proso millet	Green manure (cover crop, organic fertiliser) chemical fertiliser Tillage management	to compare proso millet, sorghum and maize agronomical performances for water use efficiency under low-input management system, to compare soil fertility and biodiversity impacts of two different agronomical management systems (low-input and high input) applied to different summer crops	Field trial	2019 to 2021	3 years	Organic field: minimum tillage, green manure, mechanical weeding, no herbicide, rainfed Conventional field: conventional tillage, mechanical weeding, chemical fertiliser, irrigation	Y	N	Y	N/A	N/A	Both organic sorghum and millet showed high potential as viable summer-crop alternatives, not only to organic maize, based on yield, water use efficiency, disease tolerance and weed competition, but also to conventional maize, based on reduced environmental and economic impacts	N/A	See adaptation	LCA conducted for GHG emissions, but not directly measured				Y	Y													Y
search	94	Nicol 2013	Nicol, D. L., Finlayson, J., Colmer, T. D., & Ryan, M. H. (2013). Opportunistic Mediterranean agriculture - Using ephemeral pasture legumes to utilize summer rainfall. Agricultural Systems, 120, 76-84. https://doi.org/10.1016/j.agsy.2013.06.001	Opportunistic Mediterranean agriculture – Using ephemeral pasture legumes to utilize summer rainfall	2013	Agriculture Systems	http://dx.doi.org/10.1016/j.agsy.2013.06.001	dion.nicol@uwa.edu.au	Mukinbudin	Australia	_x0002_30.78	118.31	Cullen forage legume	crop selection	to investigate crops or pastures to convert summer rainfall into high-quality green feed and supplementary feeding is required to maintain livestock condition	Field trial	2008 to 2009	1 year	4 types of Cullen and 2 types of Medic were grown	N	N	Y	N/A	N/A	the highly opportunistic biology of summer-active ephemeral legumes (Cullen spp.) can increase the adaptation of mixed farming systems in strongly Mediterranean-type environments through production of high value forage in summers when dry feed sources are degraded by summer rainfall	(modelling found profits increased with addition of cullen into system)	N/A								Y
search	95	Ntanasi 2023	Ntanasi, T., Karavidas, I., Zioviris, G., Ziogas, I., Karaolani, M., Fortis, D., Conesa, M. A., Schubert, A., Savvas, D., & Ntatsi, G. (2023). Assessment of Growth, Yield, and Nutrient Uptake of Mediterranean Tomato Landraces in Response to Salinity Stress. Plants-Basel, 12(20), 23, Article 3551. https://doi.org/10.3390/plants12203551	Assessment of Growth, Yield, and Nutrient Uptake of Mediterranean Tomato Landraces in Response to Salinity Stress	2023	Plants	https://doi.org/ 10.3390/plants12203551	ntatsi@aua.gr	Athens	Greece	37.98389	23.70528	Tomato	Salinity stress cultivar selection	to assess the impact of salinity on the growth, yield, and macro- and micronutrient concentration in the roots, leaves, and fruit of several Mediterranean tomato landraces	Field trial	2021	1 season	salinity: 0.5 or 30 mM of NaCL Fifteen different Mediterranean tomato landraces and one tomato variety, ‘Moneymaker’, as a reference	Y	N	Y	N/A	N/A	cherry-type varieties tend to display higher tolerance to saline environments as well as a largefruited variety ('de Ramellet'. These could be used as root stocks or for breeding programmes	N/A	See adaptation									Y
search	96	Omirou 2020	Omirou, M., Anastopoulos, I., Fasoula, D. A., & Ioannides, I. M. (2020). The effect of chemical and organic N inputs on N<sub>2</sub>O emission from rain-fed crops in Eastern Mediterranean. Journal of Environmental Management, 270, 9, Article 110755. https://doi.org/10.1016/j.jenvman.2020.110755	The effect of chemical and organic N inputs on N2O emission from rain-fed crops in Eastern Mediterranean	2020	Journal of Environmental Management	https://doi.org/10.1016/j.jenvman.2020.110755	michalis.omirou@ari.gov.cy (M. Omirou), ioannide@ari.gov.cy (I.M. Ioannides).	Acheleia Paphos	Cyprus	34.7267	32.4572	Barley	Organic fertiliser and chemical fertiliser	to assess the effect of different N sources (organic and chemical) on field N2O emissions and how these emissions are associated with soil available N forms (NH4 þ and NO3 ) in three different rain-fed crops namely barley, pea and vetch	Field trial	2017 to 2018	2 years	goat composted manure (MAN), compost (COM), chemical fertiliser	N	Y	N	N2O	the lowest N2O flux range was observed in plots received no inputs, followed by plots received compost lowest emissions factors have been noticed in compost treated plots compared to soils received fertiliser or manure. Mean Efs across different crops over two seasons: fertiliser: 0.21 +/- 0.0832 manure: 0.22 +/- .05 compost: 0.13 +/- .068								Y														Y
search	97	Ortiz 2024	Ortiz, C., Yagüe, M. R., Valdez, A. S., Molina, M. G., & Bosch-Serra, A. D. (2024). Sustainability of Organic Fertilizers Use in Dryland Mediterranean Agriculture. Agriculture-Basel, 14(8), 18, Article 1301. https://doi.org/10.3390/agriculture14081301	Sustainability of Organic Fertilizers Use in Dryland Mediterranean Agriculture	2024	Agriculture	https:// doi.org/10.3390/agriculture14081301	angela.bosch@udl.cat	Alcaniz	Spain	41.7666667	1.0833333	Barley, wheat, rapeseed	chemical fertiliser management organic fertiliser management	to evaluate different fertilization strategies in terms of crop yields and soil chemical characteristics to determine which fertilization strategy best matches the EU policy goals on reducing fertilizers (mainly N inputs) and potential nutrient losses in semiarid Mediterranean regions without affecting soil quality	Field trial	2003 to 2016	13 years	five pre-sowing N fertilization treatments: control, mineral, pig slurry, and composted sewage sludge (two rates). The average N rates were 0, 30, 141, 176, and 351 kg N ha−1, respectively. They were combined with mineral N topdressings (0, 50, and 100 kg N ha−1)	Y	Y	Y	SOC	The total organic C increased in all treatments compared to the control (Tables 2 and A3) without differences between mineral and pig-slurry fertilization. Composted sewage sludge showed the highest significant values	The use of pig slurry before sowing (c. 141 kg N ha−1 as an average) is one of the best fertilization options for the studied crops and according to the studied soil parameters	N/A	Assessed but no conclusion made					Y														Y
search	98	Ottaiano 2021	Ottaiano, L., Di Mola, I., Cirillo, C., Cozzolino, E., & Mori, M. (2021). - Yield performance and physiological response of a maize early hybrid grown in tunnel and open air under different water regimes. - 13(- 20). - https://www.scopus.com/inward/record.uri?eid=2-s2.0-85117252674&doi=10.3390%2fsu132011251&partnerID=40&md5=8cebb28ef24d6b3c4825377cf5cc1b32	Yield Performance and Physiological Response of a Maize Early Hybrid Grown in Tunnel and Open Air under Different Water Regimes	2021	Sustainability	https://doi.org/10.3390/su132011251	ida.dimola@unina.it (I.D.M.); chiara.cirillo@unina.it (C.C.)	Naples	Italy	40.81667	14.33333	Maize	Temperature Water availability (Cultivar selection)	to evaluate the adaptability of an early maize hybrid grown in two temperature conditions (ordinary and high) and subjected to different water regimes	Field trial	2017	1 season	ordinary temperature, high temperature five water treatments were applied: 100% , 75% , 50%, 25%, and 0% restoration of water lost by evapotranspiration	Y	N	Y	N/A	N/A	early maize hybrid to increased air temperatures (about 3 ◦C above the current open field condition). plants resulted as much more sensitive to drought, as noticed by the growth responses under increased water deficit stress. this maize hybrid could be suitable in cultivation conditions of Mediterranean areas, where a correct management of amount and time intervals of irrigation can allow to redu…	N/A	N/A									Y							Y
search	99	Oweis 1998	Oweis, T., Pala, M., & Ryan, J. (1998). Stabilizing rainfed wheat yields with supplemental irrigation and nitrogen in a Mediterranean climate. Agronomy Journal, 90(5), 672-681. https://doi.org/10.2134/agronj1998.00021962009000050017x	Stabilizing Rainfed Wheat Yields with Supplemental Irrigation and Nitrogen in a Mediterranean Climate	1998	Agronomy Journal	https://doi.org/10.2134/agronj1998.00021962009000050017x	t.oweis@cgnet.com	Aleppo	Syria	36.01667	36.93333	Wheat	Water management (irrigation) Sowing date	to identify the optimum supplemental irrigation technology package to maximize the efficiency of water and other inputs, and to develop production functions for improved bread wheat cultivars	Field trial	1992 to 1996	4 seasons	3 planting dates (early, mid and late season) 4 rates of supplemental irrigation: 100%, 1/3, 2/3 of crop water requirements and rainfed	N	N	Y	N/A	N/A	An addition of only limited irrigation (113 full irrigation) significantly increased yields, but near maximum yields were obtained by 2/3 of full irrigation. A delay in the sowing date from November to January consistently reduced yields	N/A	See adaptation																Y
search	100	Panettieri 2020	Panettieri, M., de Sosa, L. L., Domínguez, M. T., & Madejón, E. (2020). Long-term impacts of conservation tillage on Mediterranean agricultural soils: shifts in microbial communities despite limited effects on chemical properties. Agriculture Ecosystems & Environment, 304, 9, Article 107144. https://doi.org/10.1016/j.agee.2020.107144	Long-term impacts of conservation tillage on Mediterranean agricultural soils: shifts in microbial communities despite limited effects on chemical properties	2020	Agriculture, Ecosystems and Environment	https://doi.org/10.1016/j.agee.2020.107144	marco.panettieri@csic.es	Seville	Spain	37.3890924	-5.9844589	Wheat	Tillage management	to assess the effect of different tillage systems (traditional tillage, reduced tillage and no-tillage) and crop development on soil physical, chemical and biological responses, with a special emphasis on detecting broad changes in soil microbial community structure and functionality estimated by PLFA and enzyme activities	Field trial	2018 to 2019	1 season	non-tillage (NT), reduced tillage (RT) and traditional tillage (TT	N	Y	Y	SOC	In the first sampling, soils from conservation tillage treatments (NT and RT) had slightly higher SOM than traditional tillage but it was not conclusive in the second sampling	reduced tillage was the management option with the most relevant positive effects on soil chemical properties	N/A	No differences found
search	101	Panozzo 2020	Panozzo, A., Huang, H. Y., Bernazeau, B., Vamerali, T., Samson, M. F., & Desclaux, D. (2020). Morphology, Phenology, Yield, and Quality of Durum Wheat Cultivated within Organic Olive Orchards of the Mediterranean Area. Agronomy-Basel, 10(11), 18, Article 1789. https://doi.org/10.3390/agronomy10111789	Morphology, Phenology, Yield, and Quality of Durum Wheat Cultivated within Organic Olive Orchards of the Mediterranean Area	2020	Agronomy	https://doi.org/10.3390/agronomy10111789	anna.panozzo@unipd.it	Mauguio–Montpellier	France	42.5833333	3.75	Durum Wheat	agroforestry (heat stress, drought tolerance)	to assess the effects of the presence of trees and therefore the effects of the modified microclimate environment they exerted on the wheat phenology and morphology, grain yield, and quality	Field trial	2015 to 2017	3 years	wheat is sown in an olive orchard that is not pruned, annually pruned and in an open field 25 cultivars grown	Y	N	Y	N/A	N/A	Yield significantly dropped by 43% with less shade and 83% by more shade. Biomass and spike size was greatly reduced under shade. Genotype breeding for shade is needed	N/A	See adaptation		Y
search	102	Parras-Alcantara 2015	Parras-Alcántara, L., Díaz-Jaimes, L., & Lozano-García, B. (2015). MANAGEMENT EFFECTS ON SOIL ORGANIC CARBON STOCK IN MEDITERRANEAN OPEN RANGELANDS-TREELESS GRASSLANDS. Land Degradation & Development, 26(1), 22-34. https://doi.org/10.1002/ldr.2269	MANAGEMENT EFFECTS ON SOIL ORGANIC CARBON STOCK IN MEDITERRANEAN OPEN RANGELANDS—TREELESS GRASSLANDS	2014	Land Degradation and Development	https://doi.org/10.1016/S1002-0160(21)60032-210.1002/ldr.2269	qe1paall@uco.es	Cordoba	Spain	38.6500	-4.2500	Durum wheat, barley	Tillage management	to investigate if fallowed land used for organic farming would increase SOM and improve SOC maintenance compared with conventional tillage systems	Field trial	2009	single analysis	Conventional tillage: crop system and fallow system organic farming: crop system and fallow system	Y	Y	N	SOC	he SOC concentration was higher in the top soil for all studied soils in organic farming compared with conventional tillage.	N/A	N/A	N/A
search	103	Persiani 2022	Alessandro Persiani, Mariangela Diacono & Francesco Montemurro (2022) Soil hydraulic arrangement and agro-ecological practices in organic rotations: effects on crop performance, soil properties and carbon balance, Agroecology and Sustainable Food Systems, 46:8, 1173-1197	Soil hydraulic arrangement and agro-ecological practices in organic rotations: effects on crop performance, soil properties and carbon balance	2022	Agroecology and Sustainable Food Systems	https://doi.org/10.1080/21683565.2022.2106009	mariangela.diacono@crea.gov.it	Metaponto	Italy	40.40000	16.80000	tomato and cauliflower rotation grown in the ridge zuchhine and lettuce rotation grown in the strips	Cover crops and soil hydraulic arrangement	to evaluate the effects of soil hydraulic arrangement and cover crops management on cash crops productivity, soil carbon (C) and nitrogen (N) sequestration, greenhouse gas (GHG) emissions and C balance	Field trial	2015 to 2017	2 cropping seasons	Ridge and strips: R1: Introduction of a cover crop (alfalfa - Medicago sativa L., cv. Garisenda) as living mulch, mowed during cauliflower and tomato cultivations (winter and summer periods) and flattened with a no-till roller crimper at the end of the cash crops; R2: Cover crop (clover - Trifolium incarnatum L., cv. Tiogene) as living mulch, mowed during the cauliflower cultivation (winter perio…	Y	Y	Y	SOC	Note: only carbon and nitrogen pools were directly sampled. GHG were estimated using IPCC factors. Cover crops allow for higher amounts of carbon sequestration In the ridges, C balance values were 1367, 921 and −189 kg C eq. ha−1 year−1 for R1, R2 and R3 respectively In the strips, the C balance showed negative values in all the management strategies (Figure 6b), being −1284, 1330 and −2587 kg C …	Ridge and stips combined with cover crops can conserve resources in times of climate change (extreme weather) through reducing sediment loss, erosion, prpotecting the soil surface from raindrops, allowing for lateral outflow of excess water, reducing waterlogging		Increased residue retention together with the introduction of the cover crops and minimum soil disturbance practices (no-till) may either maintain or increase crop yields hydraulic arrangements and cover crops may protect and enhance soil fertility. Increased residue retention together with the introduction of the cover crops and minimum soil disturbance practices (no-till) may restore/preserve s…						Y							Y
search	104	Persiani 2024	Persiani, A., Diacono, M., & Montemurro, F. (2024). The impact of long-term organic horticultural systems on energy outputs and carbon storages in relation to extreme rainfall events. European Journal of Agronomy, 161, 10, Article 127398. https://doi.org/10.1016/j.eja.2024.127398	The impact of long-term organic horticultural systems on energy outputs and carbon storages in relation to extreme rainfall events	2024	European Journal of Agronomy	https://doi.org/10.1016/j.eja.2024.127398	mariangela.diacono@crea.gov.it	Metaponto-MT	Italy	40.4	16.8	Cauliflower, tomato, fennel, zucchini, lettuce, peppers, clover, alfalfa	Cover crops soil hydraulic arrangments crop rotation	to conduct a sustainability assessment of agroecological practices by converting crops yield and biomass into energy outputs and carbon storages, in diversified horticultural systems	Field trial	2014 to 2021	7 years	Ridge and Strips system 1: cover crops as living mulch on ridges and break crops in strips, both with no-till termination) ridges and strips system 2: with green manured cover ridges and strips system 3: without cover crops	Y	Y	Y	SOC	The Ridge and Strips system with cover crops as living mulch on riges and break crops in strips with no-till termination had the highest carbon storage	Most resilience in system was found in the system with cover crops as living mulche on ridges and break crops in strips with no till termination	N/A	Presented in the form of energy ouput and C storage: ridges and strips without cover crops had 5 to 9% less energy output and C storage						Y	Y						Y
search	105	Piazza 2020	Piazza, G., Pellegrino, E., Moscatelli, M. C., & Ercoli, L. (2020). Long-term conservation tillage and nitrogen fertilization effects on soil aggregate distribution, nutrient stocks and enzymatic activities in bulk soil and occluded microaggregates. Soil & Tillage Research, 196, 13, Article 104482. https://doi.org/10.1016/j.still.2019.104482	Long-term conservation tillage and nitrogen fertilization effects on soil aggregate distribution, nutrient stocks and enzymatic activities in bulk soil and occluded microaggregates	2020	Soil and Tillage Research	https://doi.org/10.1016/j.still.2019.104482	gaia.piazza@santannapisa.it	Pisa	Italy	43.66667	10.31667	wheat and soy bean	tillage management chemical fertiliser management	to assess the impact of longterm conservation tillage and N fertilization in wheat-soybean rotation on soil aggregate distribution, nutrients stocks and functions of soil microorganisms related to C, N, P and S cycles at different aggregation scales	Field trial	1993 to 2016	23 years	conventional tillage and minimum tillage nitrogen application : 0 and 200 kg N per ha	N	Y	Y	SOC	minimum tillage under high N fertilization promoted SOC accumulation	long-term minimum tillage and N fertilization increased soil fertility and enzymes activities, but produced modest effects on grain yield of wheat and soybean	N/A	See adaptation					Y
search	106	Preity 2022	Preiti, G., Antonio, C., Porto, P., Romeo, M., Monti, M., & Bacchi, M. (2022). Long-term effects of different arable cropping systems on surface erosion processes and C-factor in hilly Mediterranean environment. Soil & Tillage Research, 223, 12, Article 105480. https://doi.org/10.1016/j.still.2022.105480	Long-term effects of different arable cropping systems on surface erosion processes and C-factor in hilly Mediterranean environment	2022	Soil Tillage Research	https://doi.org/10.1016/j.still.2022.105480	giovanni.preiti@unirc.it	Calabria	Italy	38.26667	15.81667	various cereals, legumes, vegetables	cover crop crop rotation tillage management	to determine the vegetation cover effectiveness, diversified by structure and duration of the crops in rotation, and the soil tillage impact on erosion and surface runoff	Field trial	2006 to 2018	12 years	conventional cultivation system, two conservation systems, one mixed (conventional / conservative) and one standard plot	Y	N	Y	N/A	N/A	conservative cropping systems (minimum tillage, crop residues, grassland cultivation) represent an important tool for water erosion containment in Mediterranean area	N/A	N/A						Y	Y
search	107	Qasim 2024	Qasim, S., Gul, S., Ziad, T., Yunus, A. W., Khan, R. U., Akbar, A., & Buriro, A. H. (2024). Influence of composted manures and co-composted biochar on growth performance of saffron and soil nutrients under varying electrical conductivity soil conditions: A two-year field study. Journal of Agriculture and Food Research, 18, 10, Article 101467. https://doi.org/10.1016/j.jafr.2024.101467	Influence of composted manures and co-composted biochar on growth performance of saffron and soil nutrients under varying electrical conductivity soil conditions: A two-year field study	2024	Journal of Agriculture and Food Research	https://doi.org/10.1016/j.jafr.2024.101467	shamim.gul@mail.mcgill.ca	Quetta	Pakistan	30.1942	66.9556	Saffron	biochar organic fertiliser management	to test composted manures and their co-compost with wood-derived biochar as fertilizers in saline soil to reduce the salinity stress on saffron	Field trial	2020 to 2022	2 years	Applied to saline and non-saline soil (1) control (no fertilizer amendment), (2) composted manure from sheep and goat (SG), (3) composted manure from cow and buffalo (FYM), (4) composted manure from poultry (PM), (5) co-composted biochar with SG (SG-B), (6) co-composted biochar with FYM (FYM-B), and (7) co-composted biochar with PM (PM-B)	N	N	Y	N/A	N/A	in the infertile soil with low SOM concentration, fresh amendment of these fertilizers may cause high uptake of Na by crops and may affect negatively the yield of crops.	N/A	See adaptation			Y																Y
search	108	Radicetti 2019	Radicetti, E., Osipitan, O. A., Langeroodi, A. R. S., Marinari, S., & Mancinelli, R. (2019). CO<sub>2</sub> Flux and C Balance due to the Replacement of Bare Soil with Agro-Ecological Service Crops in Mediterranean Environment. Agriculture-Basel, 9(4), 13, Article 71. https://doi.org/10.3390/agriculture9040071	CO2 Flux and C Balance due to the Replacement of Bare Soil with Agro-Ecological Service Crops in Mediterranean Environment	2019	Agriculture	https://doi.org/10.1016/S1002-0160(21)60032-210.3390/agriculture9040071	radicetti@unitus.it (E.R.); mancinel@unitus.it	Tuscia	Italy	45.4167	12.0667	Durum wheat	Cover crops	to study if in the Mediterranean environment the replacement of bare soil with the adoption of adequate agro-ecological service crop can be profitably used for sustainable agriculture to improve carbon accumulation and soil characteristics also during their growing season	Field trial	2009 to 2011	2 seasons	Three agro-ecological service crops (hairy vetch (Vicia villosa Roth. var. Capello), oat (Avena sativa L. var. Donata), and oilseed rape (Brassica napus L. var. Licapo)) and a bare soil with no cover	Y	Y	N	CO2	hairy vetch accumulated the largest amount of total biomass and carbon (input), also resulting in a better performance when soil CO2 emissions (output) were considered.	N/A	N/A	Hairy vetch and oat perfomred best, especially since they were frost resistant						Y
search	109	Raffa 2022	Raffa, D. W., Antichi, D., Carlesi, S., Puig-Sirera, A., Rallo, G., & Bàrberi, P. (2022). Ground vegetation covers increase grape yield and must quality in Mediterranean organic vineyards despite variable effects on vine water deficit and nitrogen status. European Journal of Agronomy, 136, 14, Article 126483. https://doi.org/10.1016/j.eja.2022.126483	Ground vegetation covers increase grape yield and must quality in Mediterranean organic vineyards despite variable effects on vine water deficit and nitrogen status	2022	European Journal of Agronomy	https://doi.org/10.1016/j.eja.2022.126483	stefano.carlesi@santannapisa.it	Tuscany	Italy	43.37058	11.42206	Grape	Tillage management cover crop	the study the effect on vine SPAD, water stress, yield and must quality of a set of different inter-row soil managements	Field trial	2017 to 2020	3 years	5 practices studied on two organic farms Conventional tillage pigeon bean cover crop incorporated into soil with disc plow barley and squaaroson clover cover crop incorporated by disc plow barley and squarrosum clover cover crop left as dead mulch on soil surface spontaneous vegetation mown and left as dead mulch on soil surface	Y	N	Y	N/A	N/A	Groundcovers induced only a moderate and temporary stress that affected grape production and quality differently. While the barley-clover mixture significantly reduced grape production irrespectively of termination type, spontaneous vegetation and soil-incorporated cover crop of pigeon bean were associated with higher grape yields	N/	See adaptation						Y
search	110	Renwick 2025	Renwick, L. L. R., Celedón, A., Nájera, F., Espoz, J. P. F., Celedón, D., Arellano, C., & Salazar, O. (2025). Integrated crop-livestock farms have higher topsoil nitrogen and carbon than crop-only farms in Chilean Mediterranean climate volcanic soils. Agricultural Systems, 222, 8, Article 104172. https://doi.org/10.1016/j.agsy.2024.104172	Integrated crop-livestock farms have higher topsoil nitrogen and carbon than crop-only farms in Chilean Mediterranean climate volcanic soils	2025	Agricultural Systems	https://doi.org/10.1016/j.agsy.2024.104172	leah.renwick@uc.cl	Nuble	Chile	-36.38747 -36.89094	-71.75917 -72.10500	winter forage: ryegrass, oat	Crop-livestock integration cover crop	to assess on-farm if winter grass forages and beef cattle grazing in annual crop rotations lead to greater soil total N and SOC to a soil depth of 1 m	Field trial	2022 to 2023	2 seasons	four integrated crop-livestock (ICL) fields with grazed or ungrazed winter forage (annual ryegrass, oat) in the crop rotation (cereals, grain legumes, industrial crops), and four neighboring fields with winter fallow in the rotation	Y	Y	Y	SOC	integrated livestock systems had 8 % higher SOC concentrations (+0.5 % SOC) compared to paired non-integrated crop livestock sites in the top 15 cm soil layer. N odifference was found in the layer between 15cm and 1m.	Integrated livestock systems had 10% higher total N in the top 15 cm layer. integrating non-leguminous winter forages and grazing into annual crop rotations on-farm helps retain N and store SOC in topsoil	N/A	N/A						Y											Y
search	111	Righini 2019	Righini, D., Zanetti, F., Martínez-Force, E., Mandrioli, M., Toschi, T. G., & Monti, A. (2019). Shifting sowing of camelina from spring to autumn enhances the oil quality for bio-based applications in response to temperature and seed carbon stock. Industrial Crops and Products, 137, 66-73. https://doi.org/10.1016/j.indcrop.2019.05.009	Shifting sowing of camelina from spring to autumn enhances the oil quality for bio-based applications in response to temperature and seed carbon stockv	2019	Industrial Crops and Products	https://doi.org/10.1016/j.indcrop.2019.05.009	federica.zanetti5@unibo.it	Cadriano	Italy	44.55	11.3833	Camelina	Sowing time	to conduct a study on the response of spring camelina to the effects of autumn and spring sowing	Field trial	2015 to 2017	2 years	Midas variety was sown in spring and autumn in the field trials Experiments were also conducted in growth chambers under controlled light and temperature	Y	N	Y	N/A	N/A	autumn sowing of spring camelina varieties appeared to be the best agronomic practice to increase both seed yield and oil quality	N/A	See adaptation
search	112	Rodriquez 2021	Rodríguez, B. C., Zuazo, V. H. D., Rodríguez, M. S., Ruiz, B. G., & García-Tejero, I. F. (2021). Soil Erosion and the Efficiency of the Conservation Measures in Mediterranean Hillslope Farming (SE Spain). Eurasian Soil Science, 54(5), 792-806. https://doi.org/10.1134/s1064229321050069	Soil Erosion and the Efficiency of the Conservation Measures in Mediterranean Hillslope Farming (SE Spain)	2021	Soil Erosion	https://doi.org/10.1134/S1064229321050069	victorh.duran@juntadeandalucia.es	Lanjaron	Spain	36.9185	-3.4818	Olive, almond, vinyard	tillage management cover crops	to evaluate the response of soil erosion and runoff to different soil-management strategies	Field trial	not stated	4 years	minimum tillage, minimum tillage with plant strips, and no-tillage with plant strips	N	N	Y	N/A	N/A	the integration of minimum tillage with plant strips singularly lowered soil erosion by decreasing surface runoff, being the rainfall energy was dissipated twice by soil roughness and plant strips	N/A	N/A						Y
search	113	Rojano-Cruz 2023	Rojano-Cruz, R., Martínez-Moreno, F. J., Galindo-Zaldívar, J., Lamas, F., González-Castillo, L., Delgado, G., Párraga, J., Ramírez-González, V., Durán-Zuazo, V. H., Cárceles-Rodríguez, B., & Martín-García, J. M. (2023). Impacts of a hydroinfiltrator rainwater harvesting system on soil moisture regime and groundwater distribution for olive groves in semi-arid Mediterranean regions. Geoderma, 438, …	Impacts of a hydroinfiltrator rainwater harvesting system on soil moisture regime and groundwater distribution for olive groves in semi-arid Mediterranean regions	2023	Geoderma	https://doi.org/10.1016/j.geoderma.2023.116623	fjmmoreno@ucm.es	Baena	Spain	37.6167	-4.3225	Olive	rain water harvest (iriigation)	to evaluate the impact of this new rainwater harvesting system in the Mediterranean environment affected by climate change, through geophysical and soil sampling methods	Field trial	2017 to 2022	6 years	with and without hydroinfiltrator	Y	N	Y	N/A	N/A	the new infiltration device: (i) increases moisture in the soil endopedons (so reduced evaporation); (ii) aids in the retention of water in the root zone of the olive tree (the excess water could recharge of the aquifers by percolation); and (iii) increases the olive yield and quality	N/A	See adaptation																Y
search	114	Romic 2020	Romić, D., Karoglan Kontić, J., Preiner, D., Romić, M., Lazarević, B., Maletić, E., Ondrašek, G., Andabaka, Ž., Bakić Begić, H., Bubalo Kovačić, M., Filipović, L., Husnjak, S., Marković, Z., Stupić, D., Tomaz, I., & Zovko, M. (2020). - Performance of grapevine grown on reclaimed Mediterranean karst land: Appearance and duration of high temperature events and effects of irrigation. - 236. - https:…	Performance of grapevine grown on reclaimed Mediterranean karst land: Appearance and duration of high temperature events and effects of irrigation	2020	Agriculture Water Management	https://doi.org/10.1016/j.agwat.2020.106166	dpreiner@agr.hr	Sibenik	Croatia	43.66583	15.97889	Grape	irrigation management	to provide insight into the development of a water-efficient management strategy in vineyards established on stony soils in the area with frequent occurrence of extremely high air temperatures during vegetation period	Field trial	2015 to 2016	2 years	irrigation based on 50, 75, and 100 % of crop evapotranspiration	Y	N	Y	N/A	N/A	the irrigation level in which 50 % of the total evapotranspiration was supplemented did not compromise the balance between the yield level and quality. Higher levels of irrigation resulted in an additional increase in yield and in a higher juice total soluble solids concentration, but also in a decrease in grape skin polyphenols, especially anthocyanins, which can result in lower wine quality	N/A	See adaptation																Y
search	115	Ruggeri 2024	Ruggeri, R., Rossini, F., Ronchi, B., Primi, R., Stamigna, C., & Danieli, P. P. (2024). Potential of teff as alternative crop for Mediterranean farming systems: Effect of genotype and mowing time on forage yield and quality. Journal of Agriculture and Food Research, 17, 9, Article 101257. https://doi.org/10.1016/j.jafr.2024.101257	Potential of teff as alternative crop for Mediterranean farming systems: Effect of genotype and mowing time on forage yield and quality	2024	Journal of Agriculture and Food Research	https://doi.org/10.1016/j.jafr.2024.101257	rossini@unitus.it	Viterbo	Italy	42.7167	12.1333	Teff	Cultivar Harvesting time	evaluating the effect of different teff accessions and mowing times on the biomass yield and quality of forage teff (including the first regrowth)	Field trial	2016 to 2017	2 years	6 genotypes were compared mowing at three growth phases (flag leaf unrolled, booting, heading)	Y	N	Y	N/A	N/A	best harvesting time is heading since it allows to maximize both biomass yield and crude protein (CP) content. teff accessions which deserve to be deeply explored as forage types were T8 and T14	N/A	teff genotypes yielded from 7 t DM ha−1 to 11 t DM ha−1									Y		Y
search	116	Sanchez Navarro 2022	Sanchez-Navarro, V., Shahrokh, V., Martinez-Martinez, S., Acosta, J. A., Almagro, M., Martinez-Mena, M., Boix-Fayos, C., Diaz-Pereira, E., & Zornoza, R. (2022). Perennial alley cropping contributes to decrease soil CO<sub>2</sub> and N<sub>2</sub>O emissions and increase soil carbon sequestration in a Mediterranean almond orchard. Science of the Total Environment, 845, 8, Article 157225. https://…	Perennial alley cropping contributes to decrease soil CO2 and N2O emissions and increase soil carbon sequestration in a Mediterranean almond orchard	2022	Science of the Total Environment	http://dx.doi.org/10.1016/j.scitotenv.2022.157225	raul.zornoza@upct.es (R. Zornoza).	Murcia	Spain	37.9586111	-0.9380555	Almond	Tillage Management Cover crop Irrigation	to evaluate the short-term effect of alley cropping with reduced tillage on soil CO2 and N2O emissions and soil total organic carbon (TOC) in an almond orchard under Mediterranean rainfed conditions	Field trial	2019 to 2021	2 years	almond monoculture, with tillage almond, alley cropping with thyme (evergreen), reduced tillage almond, alley cropping with caper, reduced tillage	Y	Y	Y	SOC, N2O, CH4, CO2	No methane emissions detected No significant difference in N2O emissions across treatments. Total organic carbon increased in the treatment with reduced tillage and an evergreen cover crop (thyme), and no change was observed in the almond monoculture with tillage nor the treatment with reduced tillage and a perennial cover crop (capers). Soil CO2 emissions were significantly higher in the almond …	Not core to the study They found that ever green cover crops (thme) increased soil moisture availabilty to the crop.	N/A	No negative impacts on yield	Assessed short term effects of implementing the measure (two years only). There was no yield data for caper because it did not produce in this short time period. Assessed for Total organic carbon, not soil organic carbon no fertiliser was applied					Y										Y
search	117	Sanchez Navarro 2023	Sánchez-Navarro, V., Martínez-Martínez, S., Acosta, J. A., Almagro, M., Martínez-Mena, M., Boix-Fayos, C., Díaz-Pereira, E., Temnani, A., Berrios, P., Pérez-Pastor, A., & Zornoza, R. (2023). Soil greenhouse gas emissions and crop production with implementation of alley cropping in a Mediterranean citrus orchard. European Journal of Agronomy, 142, 8, Article 126684. https://doi.org/10.1016/j.eja.2…	Soil greenhouse gas emissions and crop production with implementation of alley cropping in a Mediterranean citrus orchard	2023	European Journal of Agronomy	https://doi.org/10.1016/j.eja.2022.126684	raul.zornoza@upct.es (R. Zornoza	Murcia	Spain	30.19417	66.95556	Mandarin orchard	Cover crop Irrigation	to: i) assess if alley cropping with the multiple cropping of barley/vetch and fava bean can contribute to mitigate alley soil GHG emissions and increase soil C sequestration in a Mediterranean irrigated citrus orchard; and ii) evaluate if alley cropping can contribute to increase land productivity	Field trial	2019 to 2021	2 years	monoculture mandarin orchard, no alley crop mandarin orchard, alley crop barley/vetch and fava bean	Y	Y	N	SOC, N2O, CO2	No impact on GHGs CO2 and N2O no differences No change in SOC with alley cropping in 2 year period	N/A	Additional earnings from crop	No change in yield of Mandarin						Y										Y
search	118	Scavo 2022	Scavo, A., Restuccia, A., Bannò, M., & Mauromicale, G. (2022). Differentiated Weed-Suppressive Ability of Modern and Old Durum Wheat Cultivars after Long-Term Cultivation under Semi-Arid Climate. Plants-Basel, 11(23), 16, Article 3368. https://doi.org/10.3390/plants11233368	Differentiated Weed-Suppressive Ability of Modern and Old Durum Wheat Cultivars after Long-Term Cultivation under Semi-Arid Climate	2022	Plants	https://doi.org/10.3390/plants11233368	a.restuccia@unict.it	Sicily	Italy	37.5894444	14.5477778	Durum wheat	cultivar	to investigate the weed-suppressive ability of the modern and old durum wheat cultivars was evaluated on both the soil seedbank and real weed flora under a semi-arid climate	Field trial	2022	single analysis	10 cereal farms were selected for their long-term cultivation of durum wheats. Half of them grow modern durum wheat varieties, and the other half cultivates old landraces	N	N	Y	N/A	N/A	old landraces of durum wheat may possess a stronger weed-suppressive ability than modern cultivars in terms of seedbank and aboveground biomass reduction. Within the studied area, landraces were also able to reduce the aboveground weed species diversity and to cause shifts in weed populations	N/A	N/A									Y
search	119	Schillinger 2022	Schillinger, W. F., Cogger, C. G., & Bary, A. I. (2022). Biosolids and conservation tillage for rainfed wheat farming in dry Mediterranean climates. Soil & Tillage Research, 223, 8, Article 105478. https://doi.org/10.1016/j.still.2022.105478	Biosolids and conservation tillage for rainfed wheat farming in dry Mediterranean climates	2022	Soil and Tillage Research	https://doi.org/10.1016/j.still.2022.105478	william.schillinger@wsu.edu	Washington	USA	47.00000	-118.56667	wheat	chemical fertiliser organic fertiliser tillage management	to explore the impacts of biosolids vs synthetic fertilizer in combination with undercutter (UC) conservation tillage vs tandem disk (TD) traditional tillage in an 8-yr field experiment in drought-prone region	Field trial	2011 to 2019	8 year	Undercutter tillage / tandem disk tillage biosolids / sunthetic N+S fertiliser	N	N	Y	N/A	N/A	significantly greater wheat dry straw biomass with biosolids vs synthetic fertilizers was found. Tillage management did not have an impact.	N/A	See adaptation					Y														Y
search	120	Scordia 2020	Scordia, D., Calcagno, S., Piccitto, A., Patanè, C., & Cosentino, S. L. (2020). The Impact of Soil Water Content on Yield, Composition, Energy, and Water Indicators of the Bioenergy Grass <i>Saccharum spontaneum</i> ssp. <i>aegyptiacum</i> under Three-Growing Seasons. Agronomy-Basel, 10(8), 16, Article 1105. https://doi.org/10.3390/agronomy10081105	The Impact of Soil Water Content on Yield, Composition, Energy, and Water Indicators of the Bioenergy Grass Saccharum spontaneum ssp. aegyptiacum under Three-Growing Seasons	2020	Agronomy	https://doi.org/10.3390/agronomy10081105	dscordia@unict.it	Sicily	Italy	37.4099	15.0587	Saccharum spontaneum	irrigation management	to investigate the soil water effect on a long-term plantation	Field trial	2011 to 2020	9 seasons	irrigate: 100%, 50% and 0 % water needs	Y	N	Y	N/A	N/A	The main findings suggest a high energy sustainability of this crop grown in the absence of input (irrigation, fertilization, crop protection) for more than ten years	N/A	See adaptation																Y
search	121	Shackelford 2019	Shackelford, G. E., Kelsey, R., & Dicks, L. V. (2019). Effects of cover crops on multiple ecosystem services: Ten meta-analyses of data from arable farmland in California and the Mediterranean. Land Use Policy, 88, 10, Article 104204. https://doi.org/10.1016/j.landusepol.2019.104204	Effects of cover crops on multiple ecosystem services: Ten meta-analyses of data from arable farmland in California and the Mediterranean	2019	Land Use Policy	https://doi.org/10.1016/j.landusepol.2019.104204	gorm.shackelford@gmail.com	N/A	USA Mediterranean (various)	not stated	not stated	various	cover crop	to give an overview of the average effects of cover crops across all experimental conditions in Mediterranean arable fields	Meta-analysis				Y	Y	Y	CO2	CO2 increases with cover crops, but this does not consider broader mitigation affects	In plots with cover crops, there was 13% less water, 9% more organic matter and 41% more microbial biomass in the soil, 27% fewer weeds compared to control plots with bare soils or winter fallows	N/A	See adaptation						Y
search	122	Shtaya 2021	Shtaya, M. J. Y., Emeran, A. A., Fernández-Aparicio, M., Abu Qaoud, H., Abdallah, J., & Rubiales, D. (2021). Effects of crop mixtures on rust development on faba bean grown in Mediterranean climates. Crop Protection, 146, 6, Article 105686. https://doi.org/10.1016/j.cropro.2021.105686	Effects of crop mixtures on rust development on faba bean grown in Mediterranean climates	2021	Crop Protection	https://doi.org/10.1016/j.cropro.2021.105686	mshtaya@najah.edu	Tulkarm Kaft El-Sheik	Palestine Egypt	32.31519 30.78333	35.02033 30.98333	Faba bean	Intercropping (disease management)	to quantify the effect of intercropping faba bean with cereal species on the development of U. viciae-fabae (rust) in faba bean in Mediterranean environments	Field trial	2006 to 2008	2 seasons	100% faba bean 50% faba bean, 50% wheat 50% faba bean, 50% Triticale 50% faba bean, 50% oat 50% faba bean, 50% barley	N	N	Y	N/A	N/A	faba bean rust is significantly reduced when faba bean is intercropped with cereals confirming the value of faba bean-cereal intercropping for the management of faba bean rust	N/A	N/A															Y
search	123	Smukler 2012	Smukler, S. M., O'Geen, A. T., & Jackson, L. E. (2012). Assessment of best management practices for nutrient cycling: A case study on an organic farm in a Mediterranean-type climate. Journal of Soil and Water Conservation, 67(1), 16-31. https://doi.org/10.2489/jswc.67.1.16	Assessment of best management practices for nutrient cycling: A case study on an organic farm in a Mediterranean-type climate	2012	Journal of Soil and Water Conservation	https://doi.org/10.2489/jswc.67.1.16	Not stated	California	USA	38.5800	-121.4944	Tomato	Cover crop Reuse water runoff	to assess the environmental impacts of management practices designed to protect water quality (reduce leaching and runoff), including tailwater systems ande cover crops on organic farms.	Field trial	2005 to 2006	1 seasons	Tomato and fallow tomato and cover crop (oats) Rainfed, irrigated	N	Y	N	N2O, CO2	In a farm system, the GHG emissions are less with a cover crop and tailwater system compared to a fallow crop. CO2 emissions are greatly reduced while N2O emissions are slightly higher	N/A	N/A	The yield is slighly lower in the system with a cover crop and tailwater system compared to fallow						Y										Y
search	124	Solinas 2021	Solinas, S., Tiloca, M. T., Deligios, P. A., Cossu, M., & Ledda, L. (2021). Carbon footprints and social carbon cost assessments in a perennial energy crop system: A comparison of fertilizer management practices in a Mediterranean area. Agricultural Systems, 186, 16, Article 102989. https://doi.org/10.1016/j.agsy.2020.102989	Carbon footprints and social carbon cost assessments in a perennial energy crop system: A comparison of fertilizer management practices in a Mediterranean area	2021	Agriculture Systems	https://doi.org/10.1016/j.agsy.2020.102989	ssolinas@uniss.it (S. Solinas), mtiloca@uniss.it (M.T. Tiloca), pdeli@uniss.it (P.A. Deligios), marcocossu@uniss.it (M. Cossu), l.ledda@staff. univpm.it, l.ledda@staff.univpm.it (L. Ledda).	Sardinia	Italy	41.0000	9.0000	Cardoon	Biochar Cover crop	to evaluate the potential performance of different N management practices in perennial energy crop cultivation (cardoon) in a Mediterranean area in terms of their ability to reduce GHG emissions and foster SOC storage in the long term	Field trial	2014 to 2015	2 years	two conventional patterns, namely, local practices based on the use of synthetic fertilizers with high and low N inputs (HI and LI, respectively) Three alternative N fertilization practices, biochar (Bi) use, cover crop (CC) cultivation and their combination (CC + Bi)	Y	Y	N	SOC, N2O, CH4, CO2	The rates of carbon sequestration ranged from 72.7 (HI) to 26.2 (LI) t CO2e t −1 of biomass. Biochar and cover crop had no impact on GHG emission reduction or carbon sequestration. The HI treatment resulted in the worst GHG balance and the highest SOCS, whereas LI + CC demonstrated good performance in terms of GHG emission reduction and yield, followed by that of LI + Bi. In the LI + Bi + CC trea…	N/A	N/A	N/A			Y			Y
search	125	Sommer 2011	Sommer, R., Ryan, J., Masri, S., Singh, M., & Diekmann, J. (2011). Effect of shallow tillage, moldboard plowing, straw management and compost addition on soil organic matter and nitrogen in a dryland barley/wheat-vetch rotation. Soil & Tillage Research, 115, 39-46. https://doi.org/10.1016/j.still.2011.06.003	Effect of shallow tillage, moldboard plowing, straw management and compost addition on soil organic matter and nitrogen in a dryland barley/wheat-vetch rotation	2011	Soil and Tillage Research	https://doi.org/10.1016/j.still.2011.06.003	J.Ryan@cgiar.org	Aleppo	Syria	36.01063222587987	36.92978330047727	Barley	Tillage management crop rotation residue management	to assess the effect of conventional and shallow tillage and different levels of residue retention and compost addition on SOM, N and C fractions within the soil	Field trial	1996 to 2008	12 years	Conventional tillage / shallow tillage Four-course rotation with the cropping sequence: vetch hay– barley–vetch hay–wheat / Two-course rotation: vetch hay–barley. Burning all straw and stubble / Removing loose cereal straw and incorporating stubble into soil / incorporating stubble and straw into soil / incorporating stubble and straw into soil and adding compost before planting every second year…	Y	Y	Y	SOC	No difference found in SOC across treatments	soil fertility, and consequently crop yields, in the dry land cropping of northern Syria could be increased by the addition of compost. Shallow tillage, which consumes less energy, was shown to accentuate this effect within an acceptable and viable forage legume/cereal rotation	N/A	See adaptation							Y															Y
search	126	Soto 2021	Soto, R. L., Martínez-Mena, M., Padilla, M. C., & de Vente, J. (2021). Restoring soil quality of woody agroecosystems in Mediterranean drylands through regenerative agriculture. Agriculture Ecosystems & Environment, 306, 13, Article 107191. https://doi.org/10.1016/j.agee.2020.107191	Restoring soil quality of woody agroecosystems in Mediterranean drylands through regenerative agriculture	2021	Agriculture, Ecosystems and Environment	https://doi.org/10.1016/j.agee.2020.107191	rlujan@cebas.csic.es	Granada, Almeria and Murcia	Spain	37.177336 36.838139 37.98704	-3.598557 -2.459740 -1.13004	Almond	Tillage management cover crops organic fertiliser	to: 1) evaluate the overall potential of RA to contribute to restoration of degraded woody agroecosystems in Mediterranean drylands and, to 2) assess the impacts of different combinations of RA practices on crucial soil quality and crop performance indicators	Field trial	2018	single analysis	1) reduced tillage with green manure (GM), 2) reduced tillage with organic amendments (OA), 3) reduced tillage with green manure and organic amendments (GM&OA), and 4) no tillage with permanent natural covers and organic amendments (NT&OA)	N	Y	Y	SOC	SOC was 20 % higher in OA, 25 % higher in GM&OA and 31 % higher in NT&OA. Although not significant, GM presented a slight increase of 5 % in SOC with respect to CT	RA treatments combining ground covers and organic amendments (GM&OA and NT&OA) exhibited greater overall soil quality restoration than individual practices. NT&OA stood out for presenting the highest soil quality improvements	N/A	N/A						Y													Y
search	127	Sousa 2021	Sousa, A. A. R., Muñoz-Rojas, J., Pinto-Correia, T., Aguilera, P. A., Barandica, J. M., & Rescia, A. J. (2021). A Comparative Analysis of Soil Loss Tolerance and Productivity of the Olive Groves in the Protected Designation of Origin (PDO) Areas Norte Alentejano (Portugal) and Estepa (Andalusia, Spain). Agronomy-Basel, 11(4), 23, Article 665. https://doi.org/10.3390/agronomy11040665	A Comparative Analysis of Soil Loss Tolerance and Productivity of the Olive Groves in the Protected Designation of Origin (PDO) Areas Norte Alentejano (Portugal) and Estepa (Andalusia, Spain)	2021	Agronomy	https://doi.org/ 10.3390/agronomy11040665	antonr05@ucm.es (A.A.R.S.); aguilera@ual.es (P.A.A.); alejo296@bio.ucm.es (A.J.R.)	Norte Alentejano	Portugal	39.2928	-7.4308	Olive	chemical fertiliser management tillage management cover crop	to evaluate the erosion risks of differently managed olive farms, traditional, integrated and intensive farms	Field trial	not stated	single analysis	(a) Traditional mechanised groves in soils with a slope of <20% covering 46% of the olive grove area in this region. The plant density of these crops is <140 trees ha−1, and the use of chemical fertilisers is allowed. (b) Integrated management, with crops representing 45% of the PDO, with a planting density between 140 and 399 trees ha−1, where the addition of synthetic fertilisers is regulated b…	Y	N	Y	N/A	N/A	The higher sustainability levels were detected in integrated agriculture, a fact that is influenced by the conservation practices characteristic in this management model, highlighting the regulated use of synthetic fertilisers and machinery by technical control agencies and the implementation of partial herbaceous plant covers, measures contributing to increased soil fertility and stability and r…	N/A	N/A					Y	Y
search	128	Sousa 2024	Sousa, B., Soares, C., Sousa, F., Martins, M., Mateus, P., Rodrigues, F., Azenha, M., Moutinho-Pereira, J., Lino-Neto, T., & Fidalgo, F. (2024). - Enhancing tomato plants' tolerance to combined heat and salt stress – The role of arbuscular mycorrhizae and biochar. - 948. - https://www.scopus.com/inward/record.uri?eid=2-s2.0-85199464470&doi=10.1016%2fj.scitotenv.2024.174860&partnerID=40&md5=d3cd61…	Enhancing tomato plants' tolerance to combined heat and salt stress – The role of arbuscular mycorrhizae and biochar	2024	Science of the Total Environment	https://doi.org/10.1016/j.scitotenv.2024.174860	bruno.filipe@fc.up.pt	Porto	Portugal	41.15278	-8.63750	Tomato	Biochar Arbuscular mycorrhizal fungi (symbiotic amendment)	to understand how AMF and substrate amendment with biochar can modulate tomato plants’ growth under the combined impact of salt and heat	pot trial	not stated	1 season	Optimal growth conditions with and without biochar +AMF salinity exposure with and without biochar + AMF heat treatment with and without biochar + AMF combined heat treatment and salinity with and without biochar + AMF	Y	N	Y	N/A	N/A	it can be concluded that soil/substrate supplementation with AMF and biochar has the potential to modulate plants’ mineral, photosynthetic, and redox metabolism	N/A	N/A			Y
search	129	Spada 2024	Spada, M., Marín-Sanz, M., Bigini, V., Quagliata, G., Coppa, E., Barro, F., Savatin, D., Ruggeri, R., Sestili, F., Rossini, F., & Astolfi, S. (2024). Use of biostimulants for water stress mitigation in two durum wheat (Triticum durum Desf.) genotypes with different drought tolerance. Plant Stress, 14, 11, Article 100566. https://doi.org/10.1016/j.stress.2024.100566	Use of biostimulants for water stress mitigation in two durum wheat (Triticum durum Desf.) genotypes with different drought tolerance	2024	Plant Stress	https://doi.org/10.1016/j.stress.2024.100566	sastolfi@unitus.it	not stated	not stated	not stated	not stated	durum wheat	biostimulant	to assess how seed coating with extracts from Codium fragile and Opuntia ficus-barbarica could improve durum wheat growth and agronomic performance and tolerance to abiotic stressors	Field trial	not stated	not stated	plants adequately supplied with water / with biostimulant A / with biosimulant B plants subjected to water deficit / with biostimulant A / with biostimulant B	Y	N	Y	N/A	N/A	the preliminary findings of this study underline the effectiveness of tested biostimulants for mitigating drought stress in sensitive DW cultivars	N/A	N/A				Y
search	130	Steenwerth 2008	Steenwerth, K., & Belina, K. M. (2008). Cover crops enhance soil organic matter, carbon dynamics and microbiological function in a vineyard agroecosystem. Applied Soil Ecology, 40(2), 359-369. https://doi.org/10.1016/j.apsoil.2008.06.006	Cover crops enhance soil organic matter, carbon dynamics and microbiological function in a vineyard agroecosystem	2008	Applied Soil Ecology	https://doi.org/10.1016/j.apsoil.2008.06.006	ksteenwerth@ucdavis.edu, ksteeenwerth@gmail.com	California	USA	36.3183	-121.2209	Grape	Cover crops tillage management	to understand how cover crops and cultivation affect soil C dynamics in a vineyard	Field trial	2005 to 2006	1 season	Tilled treatment with no cover crop Triticale cover crop Rye cover crop	Y	Y	N	SOC, CO2	soil CO2 efflux was 2–3 times greater in the cover crop treatments than ‘Cultivation’ during winter and spring when soils were moist from precipitation. The dry summer months the CO2 efflux was similar across all. More carbon was found in the treatments with cover crop. ‘Trios’ provided more soil C than ‘Rye’	N/A	N/A	N/A						Y
search	131	Suriyagoda 2013	Suriyagoda, L. D. B., Real, D., Renton, M., Lambers, H., & Ryan, M. H. (2013). Establishment, survival, and herbage production of novel, summer-active perennial pasture legumes in the low-rainfall cropping zone of Western Australia as affected by plant density and cutting frequency. Crop & Pasture Science, 64(1), 71-85. https://doi.org/10.1071/cp12398	Establishment, survival, and herbage production of novel, summer-active perennial pasture legumes in the low-rainfall cropping zone of Western Australia as affected by plant density and cutting frequency	2013	Crop and Pasture Science	http://dx.doi.org/10.1071/CP12398	megan.ryan@uwa.edu.au	Buntine Newdegate	Australia	-30.00833 -33.10444	116.34444 118.83056	Forage legume: Bituminaria bituminosa Cullen species	density cutting frequency	investigate increased forage availability in the dry months of summer/autumn	Field trial	2008 to 2010	2 years	5 densities: 1,2,4,8,16 plants/m2 cutting frequencies: 1,2,3,4 cuts/year	N	N	Y	N/A	N/A	B. bituminosa shows promise as a perennial summer forage for low-rainfall zones, with a density of 8–16 plants/m2 and cutting frequency of 3 cuts/year (i.e. cut twice in summer–autumn), while C. australasicum and C. pallidum warrant further study	N/A	N/A										Y										Y
search	132	Swanepoel 2019	Swanepoel, P. A., le Roux, P. J. G., Agenbag, G. A., Strauss, J. A., & MacLaren, C. (2019). Seed-Drill Opener Type and Crop Residue Load Affect Canola Establishment, but Only Residue Load Affects Yield. Agronomy Journal, 111(4), 1658-1665. https://doi.org/10.2134/agronj2018.10.0695	Seed-Drill Opener Type and Crop Residue Load Affect Canola Establishment, but Only Residue Load Affects Yield	2019	Agronomy Journal	https://doi.org/10.2134/agronj2018.10.0695	pieterswanepoel@sun.ac.za	Western Cape	South Africa	-33.2784	18.7032	Canola	Planting technology Crop residue Crop selection	to test the effect of opener type (tine and disc openers) on canola establishment, growth and yield in different residue loads	Field trial	2016 to 2017	2 seasons	Tine opener / disc opener residue treatment: low / medium / high Preceding crop: wheat / medic	N	N	Y	N/A	N/A	Canola establishment was higher with tine openers than with disc openers, and was also the highest when crop residue load was low. Yield was not different in treatments	N/A	See adaptation								Y													Y	Y
search	133	Tadiello 2023	Tadiello, T., Acutis, M., Perego, A., Schillaci, C., & Valkama, E. (2023). Soil organic carbon under conservation agriculture in Mediterranean and humid subtropical climates: Global meta-analysis. European Journal of Soil Science, 74(1), 22, Article e13338. https://doi.org/10.1111/ejss.13338	Soil organic carbon under conservation agriculture in Mediterranean and humid subtropical climates: Global meta-analysis	2022	European Journal of Soil Science	https://doi.org/10.1111/ejss.13338	tommaso.tadiello@unimi.it	Various	Mediteranean and sub-tropical	N/A		various	no tillage soil cover crop rotation	to summarize studies on the effects of CA on SOC sequestration capability in the plough layer (0–0.3 m) in Mediterranean and humid subtropical climates (from all over the world) by using a weighted meta-analysis	Meta-analysis	N/A	N/A		Y	Y	N	SOC	This meta-analysis highlighted that, under the climates considered, the effect of CA adoption on SOC accumulation in the plough layer reached 20% in soils with SOC ≤ 40 Mg ha-1, while it only averaged 7% in soils with the SOC > 40 Mg ha-1	N/A	N/A	N/A							Y															Y
search	134	Tangolar 2024	TANGOLAR, SEMİH; PRIORI, SIMONE; TANGOLAR, SERPİL; TURAN, METİN; and AKÇA, ERHAN (2024) "Local organic and inorganic amendments to improve table grape production in Mediterranean vineyards of southern Türkiye," Turkish Journal of Agriculture and Forestry: Vol. 48: No. 3, Article 5	Local organic and inorganic amendments to improve table grape production in Mediterranean vineyards of southern Türkiye	2024	Turkish Journal of Agriculture and Forestry	https://doi.org/ 10.55730/1300-011X.3188	tangolar@cu.edu.tr	Adana	Turkiye	37.03056	35.37944	Grape	organic amendments inorganic amendments	to test various organic and inorganic materials, readily available at low cost, which can be used either individually or in combination to enhance grape yield and quality	Field trial	2017 to 2018	2 years	Basaltic pumice (P), cereal straw (S), commercial dried compost (DC), grapevine pruning residue (PR), and farm cattle manure (FM) were used alone or in different combinations	Y	N	Y	N/A	N/A	The combination of basaltic pumice+grapevine pruding residue+farm cattle manure produced the best results for yield, cluster weight, and berry weigh	N/A	See adaptation														Y					Y			Y
search	135	Tavakkoli 2004	Tavakkoli, A. R., & Oweis, T. Y. (2004). The role of supplemental irrigation and nitrogen in producing bread wheat in the highlands of Iran. Agricultural Water Management, 65(3), 225-236. https://doi.org/10.1016/j.agwat.2003.09.001	The role of supplemental irrigation and nitrogen in producing bread wheat in the highlands of Iran	2004	Agricultural Water Management	https://doi.org/10.1016/j.agwat.2003.09.001	t.oweis@cgiar.org	Maragheh	Iran	37.25000	46.25000	wheat	chemical fertiliser management irrigation management	to increase production ofbread wheat in the rainfed areas of Iran highlands by better management of SI and through identifying the amounts and time of application ofwater and nitrogen to increase the efficiency of their use	Field trial	1999 to 2002	3 years	four supplemental irrigation levels (rainfed, 1/3, 2/3 and full irrigation requirements) combined with different N rates (0, 30, 60, 90 and 120 kg ha−1)	N	N	Y	N/A	N/A	The most dramatic implication from this study is the saving in irrigation water with little loss in yield. In most cases, applying 1/3 of full irrigation with 60 kgNha−1 quadrupled yield compared with rainfed conditions. The strategy ofapplying restricted amounts of water at critical growth stages based on available soil moisture	N/A	See adaptation					Y											Y
search	136	Tedone 2023	Tedone, L., Ali, S., & De Mastro, G. (2023). The Effect of Tillage on Faba Bean (<i>Vicia faba</i> L.) Nitrogen Fixation in Durum Wheat ((<i>Triticum turgidum</i> L. subsp. <i>Durum</i> (Desf))-Based Rotation under a Mediterranean Climate. Agronomy-Basel, 13(1), 17, Article 105. https://doi.org/10.3390/agronomy13010105	The Effect of Tillage on Faba Bean (Vicia faba L.) Nitrogen Fixation in Durum Wheat ((Triticum turgidum L. subsp. Durum (Desf))-Based Rotation under a Mediterranean Climate	2023	Agronomy	https://doi.org/10.3390/agronomy13010105	luigi.tedone@uniba.it	Policoro	Italy	41.1252778	16.8666667	durum wheat and faba bean	Tillage management	to test the ability of the no-tillage soil management technique to contribute to the enhancement of the N2 fixation process by the faba bean crop under rain-fed Mediterranean conditions	Field trial	2012 to 2014	2 seasons	tillage system was the main treatment, with reduced (RT), conventional (CT), and no-tillage (NT) systems; wheat was used as reference crop for N2 fixation	N	N	Y	N/A	N/A	Our results indicated that the contribution of nitrogen from faba bean to the soil was generally positive and increased significantly, with an accumulation value of up to 48 kg ha−1 of nitrogen in the second year. Values were higher in the no till system	N/A	N/A
search	137	Tegou 2024	Tegou, A., Giannoulis, K. D., Zournatzis, E., Papadopoulos, S., Bartzialis, D., Danalatos, N. G., & Wogiatzi-Kamvoukou, E. (2024). Assessing the Impact of Irrigation and Biostimulants on the Yield and Quality Characteristics of Two Different St. John's Wort Cultivars in Their Second Growing Season. Plants-Basel, 13(24), 18, Article 3573. https://doi.org/10.3390/plants13243573	Assessing the Impact of Irrigation and Biostimulants on the Yield and Quality Characteristics of Two Different St. John’s Wort Cultivars in Their Second Growing Season	2024	Plants	https://doi.org/ 10.3390/plants13243573	kgiannoulis@uth.gr	Thessaly	Greece	39.6261	22.3818	St Johns wort	cultivar irrigation biostimulant application	to examine the impact of irrigation and biostimulant application on the overall performance of two well-known varieties (Topaz and Taubertal) of St. John’s Wort, focusing on aspects such as crop development, drug yield, essential oil content, and the quality of essential oil within a typical Mediterranean soil–climatic setting	Field trial	2022	1 season	Cultivar: Topaz/Taubertal irrigation: rainfed / 100% reference evapotranspiration biostimulant: none / seaweeds/ forumulation (amino acids, protein, sucrose, UV filter)	N	N	Y	N/A	N/A	irrigated treatments significantly increased plant height, dry biomass yield, and essential oil production per hectare. genotype played a crucial role in influencing production potential, height, flowering, and essential oil composition, with one variety demonstrating biennial blooming and modified essential oil compounds. he effects of biostimulants varied based on their composition, with some e…	N/A	See adaptation				Y					Y							Y
search	138	Testani 2020	Testani, E., Montemurro, F., Ciaccia, C., & Diacono, M. (2020). Agroecological practices for organic lettuce: effects on yield, nitrogen status and nitrogen utilisation efficiency. Biological Agriculture & Horticulture, 36(2), 84-95. https://doi.org/10.1080/01448765.2019.1689531	Agroecological practices for organic lettuce: effects on yield, nitrogen status and nitrogen utilisation efficiency	2020	Biological Agriculture and Horticulture	https://doi.org/10.1080/01448765.2019.1689531	elena.testani@crea.gov.it	Metaponto	Italy	40.40000	16.80000	lettuce	tillage management organic fertiliser management cover crop management	to investigate the response of organic lettuce to cover crop management and organic fertilisation, in terms of yield, nitrogen status and efficiency, was investigated	Field trial	2013 to 2015	2 year	green manure: vetch flattened with roller crimper and surface tillage / vetch chopped and ploughed / no vetch and tillage organic fertiliser: anaerobic waste / composted municipal solid waste / commercial organic fertiliser / no fertiliser	Y	N	Y	N/A	N/A	The roller crimper in combination with the use of organic fertilisers assured a satisfactory response to the variability in weather, in terms of both yield stability and preservation of soil fertility	N/A	See adaptation						Y													Y
search	139	Topcu 2024	Topcu, G. D., Ozkan, S. S., & Malayoglu, H. B. (2024). EFFECT OF DIFFERENT PLANT DENSITY ON THE FORAGE YIELD AND SOME FORAGE QUALITY CHARACTERISTICS OF MORINGA (<i> Moringa</i> oleifera Lam.). Turkish Journal of Field Crops, 29(2), 140-148. https://doi.org/10.17557/tjfc.1531051	EFFECT OF DIFFERENT PLANT DENSITY ON THE FORAGE YIELD AND SOME FORAGE QUALITY CHARACTERISTICS OF MORINGA	2024	Turkish Journal of Field Crops	https://doi.org/10.17557/tjfc.1531051	gulcan.demiroglu.topcu@ege.edu.tr	Bornova	Turkiye	38.45000	27.21667	Moringa	plamting density	the effects of different planting densities of Moringa oleifera Lam., a novel and unique plant in Türkiye's agriculture and animal husbandry sectors, on yield and specific feed quality characteristics were investigated	Field trial	2020 to 2021	2 seasons	four different plant densities: 20x60 cm, 30x60 cm, 40x60 cm, and 60x60 cm	Y	N	Y	N/A	N/A	Higher planting densities led to increased biomass yield, with the highest values observed at a 20x60 cm planting density. This density also demonstrated favorable results for crude protein, NDF, and ADF, suggesting its suitability for optimizing forage quality	N/A	See adaptation																				Y
search	140	Torrus-Castillo 2023	Torrús-Castillo, M., Calero, J., & García-Ruiz, R. (2023). Does olive cultivation sequester carbon?: Carbon balance along a C input gradient. Agriculture Ecosystems & Environment, 358, 14, Article 108707. https://doi.org/10.1016/j.agee.2023.108707	Does olive cultivation sequester carbon?: Carbon balance along a C input gradient	2023	Agriculture, Ecosystems and Environment	https://doi.org/10.1016/j.agee.2023.108707	rgarcia@ujaen.es	Andalusia	Spain	43.66667	10.31667	Olive	cover crops integration of livestock organic compost residue management	to assess for the annual carbon balance in the whole olive grove, including in the trees and in the soil, in commercial olive groves along a gradient of organic carbon inputs, and to delineate the contribution of the different input and output streams of C	Field trial	2020 to 2021	single analysis	olive groves with and without management practices: management practices include: i) the implementation of spontaneous cover crops, ii) integration of livestock, iii) the application of composted olive mill pomace and/or manure, and iv) the residues of tree pruning via shredding.	Y	Y	N	SOC, CO2	carbon balance of olive grove with management practices was 5x higher than without practices	N/A	N/A	N/A						Y											Y		Y			Y
search	141	Torun 2024	Torun, H. (2024). The use of cover crop for weed suppression and competition in limited-irrigation vineyards. Phytoparasitica, 52(1), 13, Article 10. https://doi.org/10.1007/s12600-024-01124-y	The use of cover crop for weed suppression and competition in limited-irrigation vineyards	2024	Phytoparasitica	https://doi.org/10.1007/s12600-024-01124-y	hilmitorun@hotmail.com	Adana Province	Turkiye	37.0000	35.3211	Grape	Cover crops	to examine the weed suppression performance of cover crops (grass pea, berseem clover, common vetch + triticale, and phacelia) in a drip-irrigated vineyard with restricted water supply	Field trial	2020 to 2023	3 years	grass pea (Lathyrus sativus L.; LTHSA), berseem clover (Trifolium alexandrinum L.; TRFAL), common vetch + triticale (Vicia sativa L. + Triticale sp.; VICSA + TTLRI), and phacelia (Phacelia tanacetifolia Benth.; PHCTA)	Y	N	Y	N/A	N/A	vetch and triticale (VICSA + TTLRI) had the highest weed suppression rate	N/A	N/A						Y
search	142	Tous 2009	Tous, J., Romero, A., Hermoso, J. F., Ninot, A., Plana, J., & Batlle, I. (2009). Agronomic and Commercial Performance of Four Spanish Carob Cultivars. Horttechnology, 19(2), 465-470. https://doi.org/10.21273/hortsci.19.2.465	Agronomic and Commercial Performance of Four Spanish Carob Cultivars	2009	HortTechnology	https://doi.org/10.21273/HORTTECH.19.2.465	joan.tous@irta.es	Terragona	Spain	41.1667	4.85	Carob	cultivar	to determine the performance of four female cultivars growing in a rainfed orchard near the coast of Tarragona (northeastern Spain) to select the most promising cultivar for planting new orchards, especially focusing on seed content and pod production	Field trial	1991 to 2005	18 years	ultivars used in this trial were Rojal and Banya de Cabra from Catalonia, Duraio from Majorca, and Matalafera from Valencia	N	N	Y	N/A	N/A	in terms ofkernel and pod production, ‘Duraio’ appeared to be the best-performing female cultivar for planting new carob orchards	N/A	See adaptation									Y
search	143	Urbanaviciute 2024	Urbanaviciute, I., Bonfiglioli, L., & Pagnotta, M. A. (2024). Selection of Durum Wheat and SSR Markers for Organic Farming in Central Italy Using AMMI Analysis. Agronomy-Basel, 14(3), 17, Article 458. https://doi.org/10.3390/agronomy14030458	Selection of Durum Wheat and SSR Markers for Organic Farming in Central Italy Using AMMI Analysis	2024	Agronomy	https://doi.org/10.3390/ agronomy14030458	pagnotta@unitus.it	Viterbo	Italy	42.42068	12.10767	Durum wheat	cultivar	to evaluate the performance of 15 durum wheat varieties, in terms of suitability for organic farming	Field trial	2018 to 2022	4 seasons	four durum wheat varieties from ICARDA (Azeghar21(56), Icajin 38(64), Sebatel2-45, HFN 94n), five varieties from Hungary (Mv-Makaroni, Mv-Pelsodur, Mv-Vekadur, MVTD15-19, MVTD20-19), three varieties from Italy (Cappelli called Senatore Cappelli, Iride, Saragolla), and three Fuego, Gibraltar, and Vulci varieties released by Syngenta Company and Sonno Agricoltura	Y	N	Y	N/A	N/A	most stable and high yield was determined for the Fuego, Iride, and Mv-Pelsodur genotypes	N/A	See adaptation									Y
search	144	Usanmaz 2019	Usanmaz, S., Kahramanoglu, I., Alas, T., & Okatan, V. (2019). PERFORMANCE AND OIL QUALITY OF SEVEN OLIVE CULTIVARS UNDER HIGH DENSITY PLANTING SYSTEM IN NORTHERN CYPRUS. Pakistan Journal of Botany, 51(5), 1775-1781. https://doi.org/10.30848/pjb2019-5(42)	PERFORMANCE AND OIL QUALITY OF SEVEN OLIVE CULTIVARS UNDER HIGH DENSITY PLANTING SYSTEM IN NORTHERN CYPRUS	2019	Pakistan Journal of Botany	http://dx.doi.org/10.30848/PJB2019-5(42)	ibrahimcy84@yahoo.com, ikahramanoglu@eul.edu.tr	Guzelyurt	Cyprus	35.18626	32.97246	olive	cultivar	to test the performance and oil quality of five commercial clones grown in high-density systems in Northern Cyprus in comparison with two local cultivars	Field trial	2013 to 2017	6 seasons	Commercial clones: ‘Arbequina’, cv. ‘Arbosana’, cv. ‘Tosca’, cv. ‘Sikitita’ and cv. ‘Koroneiki’ local varieties: ‘Kato Drys’ and cv. ‘Klirou’	Y	N	Y	N/A	N/A	Present study indicates that Arbequina, Arbosana and Koroneiki are suitable to be trained high-density in Northern Cyprus	N/A	See adaptation									Y
search	145	Ventura 2020	Ventura, F., Poggi, G. M., Vignudelli, M., Bosi, S., Negri, L., Fakaros, A., & Dinelli, G. (2022). An Assessment of Proso Millet as an Alternative Summer Cereal Crop in the Mediterranean Basin. Agronomy-Basel, 12(3), 18, Article 609. https://doi.org/10.3390/agronomy12030609	Phenological stages of Proso millet (Panicummiliaceum L.) encoded in BBCH scale	2020	International Journal of Biometeorology	https://doi.org/10.1007/s00484-020-01891-3	francesca.ventura@unibo.it	Ravena Bologna	Italy	44.26639 44.51500	12.13000 11.40583	proso millet	Crop selection	to encode phenology of Proso Millet using BBCH scale	Field trial	2019	1 season	Proso millet in two locations	Y	N	Y	N/A	N/A	ble to grow successfully in non-irrigated and non-fertilized conditions, with a rapid life cycle and good competitiveness with weeds in open field conditions. Overall, the crop showed a good agronomic performance despite the adverse weather pattern during the season	N/A	N/A								Y
search	146	Ventura 2022	Ventura, F., Vignudelli, M., Poggi, G. M., Negri, L., & Dinelli, G. (2020). Phenological stages of Proso millet (<i>Panicum miliaceum</i> L.) encoded in BBCH scale. International Journal of Biometeorology, 64(7), 1167-1181. https://doi.org/10.1007/s00484-020-01891-3	An Assessment of Proso Millet as an Alternative Summer Cereal Crop in the Mediterranean Basin	2022	Agronomy	https://doi.org/10.3390/agronomy12030609	francesca.ventura@unibo.it	Ravena Bologna	Italy	44.26639 44.51500	12.13000 11.40583	proso millet	Crop selection	to characterize proso millet adaptability to drought and low-input field conditions especially considering water-related traits, such as water use efficiency	Field trial	2019 to 2021	3 year	Proso millet in two locations compared to maize	Y	N	Y	N/A	N/A	proso millet showed, in non-irrigated conditions, stable yield and water use efficiency (on average 0.30 kg/m2 and 1.83 kg/m3)	N/A	See adaptation								Y
search	147	Vicenti-Vicente 2016	Vicente-Vicente, J. L., García-Ruiz, R., Francaviglia, R., Aguilera, E., & Smith, P. (2016). Soil carbon sequestration rates under Mediterranean woody crops using recommended management practices: A meta-analysis. Agriculture Ecosystems & Environment, 235, 204-214. https://doi.org/10.1016/j.agee.2016.10.024	Soil carbon sequestration rates under Mediterranean woody crops using recommended management practices: A meta-analysis	2016	Agriculture, Ecosystems and Environment	http://dx.doi.org/10.1016/j.agee.2016.10.024	jvicente@ujaen.es, jlvicentevi@gmail.com (J.L. Vicente-Vicente), rgarcia@ujaen.es (R. García-Ruiz)	N/A	Global Mediterranean	N/A		olive, grape, almond	cover crops organic amendments	to derive a C response ratio, soil C sequestration rate and soil C sequestration efficiency under recommended management practices, compared to conventional management of olive and almond orchards, and vineyards	Meta-analysis	N/A	N/A		Y	Y	N	SOC	he highest soil C sequestration rate (5.3 t C ha_x0001_1 yr_x0001_1) was observed following the application OA in olive orchards (especially after olive mill pomace application), whereas CC management achieved the lowest C sequestration rates (1.1, 0.78 and 2.0 t C ha_x0001_1 yr_x0001_1, for olive orchards, vineyards and almond orchards, respectively). Mediterranean sub-climates of low annual pre…	N/A	N/A	N/A						Y													Y
search	148	Visconti 2024	Visconti, F., Peiró, E., Pesce, S., Balugani, E., Baixauli, C., & de Paz, J. M. (2024). Straw mulching increases soil health in the inter-row of citrus orchards from Mediterranean flat lands. European Journal of Agronomy, 155, 14, Article 127115. https://doi.org/10.1016/j.eja.2024.127115	Straw mulching increases soil health in the inter-row of citrus orchards from Mediterranean flat lands	2024	European Journal of Agronomy	https://doi.org/10.1016/j.eja.2024.127115	fernando.visconti@csic.es	Paiporta and Sueca	Spain	39.4173 39.2100	-0.4178 -0.3064	Citrus	Soil cover: Mulch	to investigate if rice straw mulching enhances the physical, chemical and biological soil health features including SOC in the alleyways of citrus orchards	Field trial	2019 to 2021	2.5 years	Citrus orchard, alley soil mulched with rice straw citrus orchard, alley soil kept bare using herbicide	Y	Y	N	SOC, CO2	SOC mass fraction increased 10% more under straw than in the bare soil	N/A	N/A	N/A																						Y
search	149	Vitale 2017	Vitale L., Polimeno F., Ottaiano L., Maglione G., Tedeschi A., Mori M., De Marco A., Di Tommasi P., Magliulo V. (2017): Fertilizer type influences tomato yield and soil N2O emissions. Plant Soil Environ., 63: 105–110	Fertilizer type influences tomato yield and soil N2O emissions	2017	Plant Soil and Environment	doi: 10.17221/678/2016-PSE	luca.vitale@cnr.it	Ponticelli	Italy	40.866896399856145	14.350792551337307	Tomato	Nitrogen inhibitor chemical fertiliser organic fertiliser	to evalutate yield and N2O emisions of three fertilisation types on tomatoes	Field trial	2012	1 year	Three fetiilser types: ammonium nitrate minarl ferilizer with nitrification inhibitor organo-mineral fertiliser	Y	Y	N	N2O	lowest N2O in mineral fertiliser with nitrification inhibitor organo-mineral fertiliser had lower N2O compared to mineral fertiliser The study hypothesizes that the lower N2O fluxes in organo-mineral plots compared to mineral plots were due to the reduced C and N availability in the soil, as a consequence of slow mineralization of organic component, and to a better nutrient use efficiency by plan…	N/A	N/A	Organo mineral fertilizer had highest fruiy production					Y													Y	Y
search	150	Volpi 2018a	Volpi, I., Laville, P., Bonari, E., Di Nasso, N. N. O., & Bosco, S. (2018). Nitrous oxide mitigation potential of reduced tillage and N input in durum wheat in the Mediterranean. Nutrient Cycling in Agroecosystems, 111(2-3), 189-201. https://doi.org/10.1007/s10705-018-9922-x	Nitrous oxide mitigation potential of reduced tillage and N input in durum wheat in the Mediterranean	2018	Nutrient Cycling in Agroecosystems	https://doi.org/10.1007/s10705-018-9922-x	i.volpi@santannapisa.it	Pisa	Italy	43.6667	10.3167	Tuscany	tilllage management chemical fertiliser management	to assess in a Mediterranean environment: (1) the N2O emissions mitigation potential of reducing tillage intensity and nitrogen rate and (2) the consequent effects on crop productivity	Field trial	2013 to 2015	2 seasons	tillage by ploughing (P) (at 30 cm deep) and minimum tillage with disk harrow (MT) (at 10 cm deep) zero fertilization (N0), 110 kg N ha-1 (N1) and 170 kg N ha-1 (N2)	Y	Y	N	N2O	Reducing tillage from ploughing to minimum tillage had no effect on average daily N2O flux, while decreasing the N rate from 170 to 110 kg N ha-1 reduced the average daily N2O flux, without negatively affecting the grain yield	NA	N/A	See mitigation					Y
search	151	Volpi 2018b	Volpi, I., Antichi, D., Ambus, P. L., Bonari, E., Nassi o Di Nasso, N., & Bosco, S. (2018). - Minimum tillage mitigated soil N2O emissions and maximized crop yield in faba bean in a Mediterranean environment. - 178, - 21. - https://www.scopus.com/inward/record.uri?eid=2-s2.0-85038843345&doi=10.1016%2fj.still.2017.12.016&partnerID=40&md5=636afb667953e7deec7e9efdbf4df2d4	Minimum tillage mitigated soil N2O emissions and maximized crop yield in faba bean in a Mediterranean environment	2018	Soil Tillage and Research	https://doi.org/10.1016/j.still.2017.12.016	i.volpi@santannapisa.it	Pisa	Italy	43.6667	10.3167	Faba bean	tillage management	to evaluate the effects of two tillage systems, ploughing (P) and minimum tillage (MT), on the following parameters: N2O emissions, grain yield, N assimilated in plant biomass and biological N2 fixation	Field trial	2014 to 2015	2 seasons	minimum tillage (MT), performed via disk harrow at a depth of 10 cm, and; mouldboard ploughing (P), performed at a depth of 30 cm	Y	Y	N	N2O	minimum tillage is more suitable than ploughing in this environment, both to maximize faba bean grain yield and to reduce cumulative N2O emissions by up to 80%	N/A	N/A	See Mitigation
search	152	Ward 2012	Ward, P. R., Flower, K. C., Cordingley, N., Weeks, C., & Micin, S. F. (2012). Soil water balance with cover crops and conservation agriculture in a Mediterranean climate. Field Crops Research, 132, 33-39. https://doi.org/10.1016/j.fcr.2011.10.017	Soil water balance with cover crops and conservation agriculture in a Mediterranean climate	2012	Field Crops Research	https://doi.org/10.1016/j.fcr.2011.10.017	Phil.Ward@csiro.au	Mingenew Cundredin	Australia	-28.9333333 -31.6333333	115.2833333 117.2333333	cereal	cover crop crop rotation	to investigte the impacts of cover cropping on evaporation from the soil, both over the summer/autumn fallow period, and in the subsequent cro and to quanitfy deep drainage in crops following cover crops	Field trial	2007 to 2009	3 years	(1) maximum carbon input (cereal/cereal/cereal rotation); (2) maximum diversity (cereal/legume/brassica rotation) (4) ‘district practice’ or ‘conventional’ (cereal/cereal/legume rotation)	N	N	Y	N/A	N/A	The inclusion of cover crops in farming systems in regions with a Mediterranean climate is unlikely to have major impacts on the water balance	N/A	N/A						Y	Y
search	153	Ward 2014	Ward, P. R., Lawes, R. A., & Ferris, D. (2014). Soil-water dynamics in a pasture-cropping system. Crop & Pasture Science, 65(10), 1016-1021. https://doi.org/10.1071/cp14046	Soil-water dynamics in a pasture-cropping system	2014	Crop and Pasture Science	http://dx.doi.org/10.1071/CP14046	Phil.Ward@csiro.au	Moora	Australia	-30.7825	115.8627778	barley and lupin	pature cropping (crop rotation)	to determine (i) the impact of a crop in a subtropical pasture-cropping system on deep drainage and potential groundwater recharge; and (ii) the impacts of both the pasture and the crop on temporal patterns of water use from the soil	Field trial	2009 to 2012	4 years	pasture only, crop only, pasture-cropped	N	N	Y	N/A	N/A	Pasture cropping will be as effective as pasture alone in terms of reducing deep drainage and the risk of dryland salinity	N/A	pasture cropping resulted in marginally but significantly lower WUE than crop monoculture, because of reduced crop yield and increased system water use							Y
search	154	Wilczewski 2023	Wilczewski, E., Jug, I., Lipiec, J., Galezewski, L., Durdevic, B., Kocira, A., Brozovic, B., Markovic, M., & Jug, D. (2023). Tillage system regulates the soil moisture tension, penetration resistance and temperature responses to the temporal variability of precipitation during the growing season. International Agrophysics, 37(4), 391-399. <Go to ISI>://WOS:001077717100001	Tillage system regulates the soil moisture tension, penetration resistance and temperature responses to the temporal variability of precipitation during the growing season	2023	International Agrophysics	https://doi.org/10.31545/intagr/171478	edward@pbs.edu.pl	Čačinci	Croatia	45.61316	17.86336	Maize wheat soybean	tillage management	to investigate the relationship between the tillage system applied and the soil moisture tension, penetration resistance, soil moisture content, and temperature responses to the temporal variability of precipitation	Field trial	2021 to 2023	3 seasons	standard tillage / conservation soil tillage shallow maize, soybean, wheat rotation (2021 to 2023)	N	Y	Y	SOC	he adoption of conservation tillage shallow as compared to standard tillage favourably increased the sequestration of soil organic matter	conservation tillage increased the field water capacity and decreased the difference between minimum and maximum soil temperature. Soil moisture tensions were similar for both tillage systems	N/A	N/A
search	155	Yates 2021	Yates, R. J., Harrison, R. J., Loi, A., Steel, E. J., Edwards, T. J., Nutt, B. J., Porqueddu, C., Gresta, F., & Howieson, J. G. (2021). Sourcing <i>Rhizobium leguminosarum</i> biovar <i>viciae</i> strains from Mediterranean centres of origin to optimize nitrogen fixation in forage legumes grown on acid soils. Grass and Forage Science, 76(1), 33-43. https://doi.org/10.1111/gfs.12524	Sourcing Rhizobium leguminosarum biovar viciae strains from Mediterranean centres of origin to optimize nitrogen fixation in forage legumes grown on acid soils	2021	Grass and Forage Science	https://doi.org/10.1111/gfs.12524	ron.yates@murdoch.edu.au	Brooktown	Australia	-32.2811723	116.8403889	(Forage legumes) P. sativum, Vicia sativa and Vicia villosa	rhixobial innoculants	to improve the robustness of a specific forage legume/rhizobia symbiosis to increase nitrogen fixation in low pH, infertile soils	Field trial	2014 to 2015	2 seasons	P sativum cv. Kaspa with and without innoculant innoculant comes from commercial and sourced from farming systems in Australia and Europe	Y	N	Y	N/A	N/A	Strains from farm systems were identified that optimise symbiotic associations with field peas and vetch in soils with low fertility, carbon and pH.	N/A	N/A
search	156	Zapata-Sierra 2017	Zapata-Sierra, A. J., & Manzano-Agugliaro, F. (2017). Controlled deficit irrigation for orange trees in Mediterranean countries. Journal of Cleaner Production, 162, 130-140. https://doi.org/10.1016/j.jclepro.2017.05.208	Controlled deficit irrigation for orange trees in Mediterranean countries	2017	Journal of Cleaner Production	http://dx.doi.org/10.1016/j.jclepro.2017.05.208	ajzapata@ual.es (A.J. Zapata-Sierra), fmanzano@ual.es (F. Manzano-Agugliaro)	Almeria	Spain	36.83583	-2.07028	Orange	irrigation management	to determine the minimum irrigation threshold in orange trees where the production and crop quality is least affected, thus increasing the sustainability of orange tree crops	Field trial	not stated	1 season	Irrigated with: 100% crop water needs/ 50% of water crop water needs with 100% need met during critical periods / 75% of water needs / 50% of water needs, 75% of water needs during critical phase I and 100% water needs in critical phase II	Y	N	Y	N/A	N/A	controlled deficit irrigation reduces water used by 5% compared with constant deficit irrigation and improves productivity by 4%	N/A	See adaptation																Y
search	157	Zhang 2000	Zhang, H., Pala, M., Oweis, T., & Harris, H. (2000). Water use and water-use efficiency of chickpea and lentil in a Mediterranean environment. Australian Journal of Agricultural Research, 51(2), 295-304. https://doi.org/10.1071/ar99059	Water use and water-use efficiency of chickpea and lentil in a Mediterranean environment	2000	Australian Journal of Agricultural Research	https://doi.org/10.1071/AR99059	heping.zhang@per.clw.csiro.au	Tel Hadya	Syria	36.0167	36.9333	Chick pea and durum wheat	Crop selection	to examine water use and water-use efficiency of chickpea and lentil over a range of climatic conditions	Field trial	1986 to 1998	12 seasons	Chickpea: grown after wheat that had 4 diffferent concentrations of N fertiliser, 3 intensities of grazing lentils: conventional tillage and zero tillage	N	N	Y	N/A	N/A	these long-term experiments have demonstrated that lentil is better adapted to Mediterranean environments than chickpea, produces higher grain yield, and therefore has higher water-use efficienc	N/A	See adaptation								Y
search	158	Ziche 2024	Ziche, Z. I., Mezzapesa, G. N., Dragonetti, G., & Piscitelli, L. (2024). Unveiling the Opportunities of Unexplored Use of Cover Crop in Mediterranean Agriculture through Systematic Review and Meta-Analysis. Sustainability, 16(17), 19, Article 7362. https://doi.org/10.3390/su16177362	Unveiling the Opportunities of Unexplored Use of Cover Crop in Mediterranean Agriculture through Systematic Review and Meta-Analysis	2024	Sustainability	https://doi.org/10.3390/ su16177362	mezzapesa@iamb.it	N/A	Italy Spain USA Turkey Portugal France Tunisia South Africa	N/A		various	cover crop	to investigate the standpoint adopted by the scientific community on cover crops under the Mediterranean climate	Meta-analysis				Y	Y	Y	SOC	N/A	an interest of the scientific community in the capacity of cover crops to contribute to nutrient management, weed control, and soil amelioration	N/A	N/A						Y
[truncated: 6 more columns]
